# Supplementary material for: Methoxylated Cinnamic Esters with Antiproliferative and Antimetastatic Effects on Human Lung Adenocarcinoma Cells
Source: MDPI journal article supplement (doi:10.3390/life13071428), 2023-06-22
Supplement: s1 [file s1]

## Supplementary material

# Methoxylated Cinnamic Esters with Antiproliferative and Antimetastatic Effects on Human Lung Adenocarcinoma Cells

João Graciano Sampaio <sup>1</sup>, Carolina Girotto Pressete <sup>2</sup>, Adilson Vidal Costa <sup>3</sup>, Felipe Terra Martins <sup>4</sup>, Graziela Domingues de Almeida Lima <sup>2</sup>, Marisa Ionta <sup>2,\*</sup> and Róbson Ricardo Teixeira <sup>1,\*</sup>

<sup>1</sup> Grupo de Síntese e Pesquisa de Compostos Bioativos (GSPCB), Departamento de Química, Universidade Federal de Viçosa, Viçosa-MG, 36570-900 Brazil; joaogracianojg@hotmail.com

<sup>2</sup> Programa de Pós-Graduação em Biociências Aplicadas à Saúde, Instituto de Ciências Biomédicas, Universidade Federal de Alfenas, Alfenas-MG, 37130-000 Brazil; carolina.pressete@sou.unifal-mg.edu.br (C.G.p.); graziela.lima@unifal-mg.edu.br (G.D.d.A.L.)

<sup>3</sup> Departamento de Química e Física, Universidade Federal do Espírito Santo, Alto Universitário, s/n, Guararema, Alegre-ES, 29500-000 Brazil; avcosta@hotmail.com

<sup>4</sup> Departamento de Química, Universidade Federal de Goiás, Goiânia-GO, 74690-900 Brazil; felipe@ufg.br

\*Correspondence: marisa.ionta@unifal-mg.edu.br (M.I.); robsonr.teixeira@ufv.br (R.R.T.)

## **INFRARED (IR) SPECTRA OF COMPOUNDS**

**4a–4p AND 5a–5p**

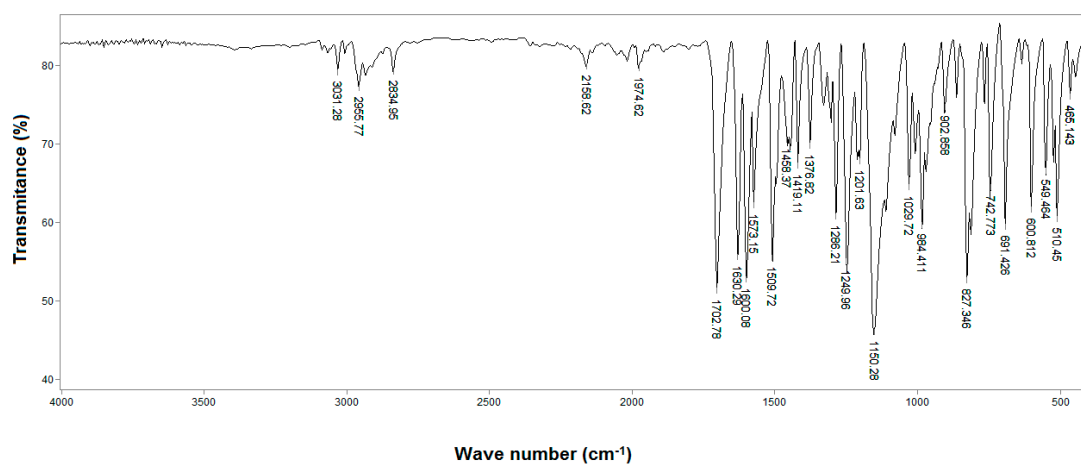

**Figure S1** – Infrared spectrum (ATR) of **4a**.

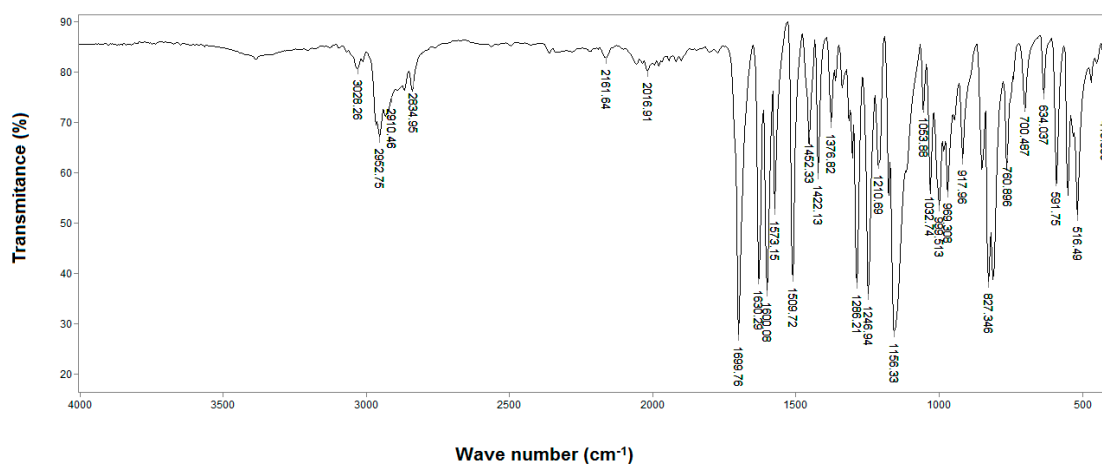

**Figure S2** – Infrared spectrum (ATR) of **4b**.

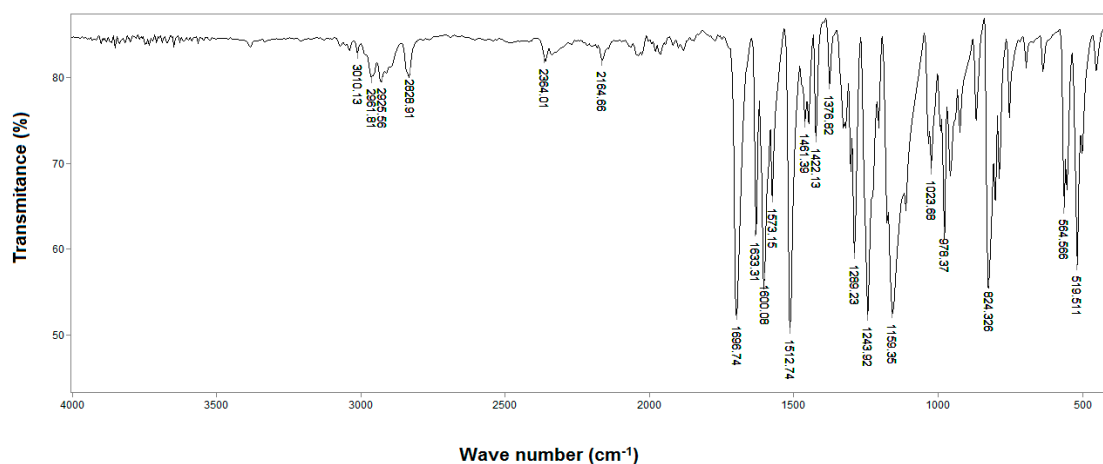

**Figure S3** – Infrared spectrum (ATR) of **4c**.

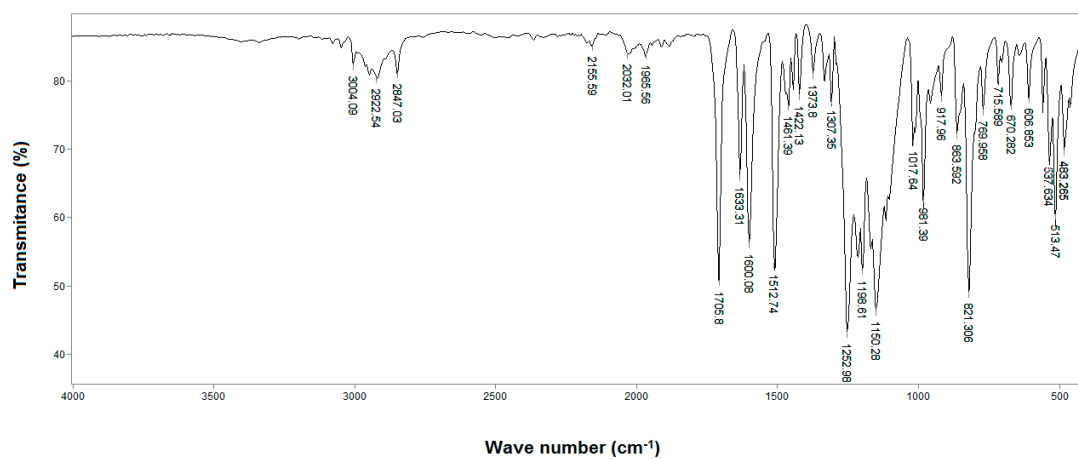

**Figure S4** – Infrared spectrum (ATR) of **4d**.

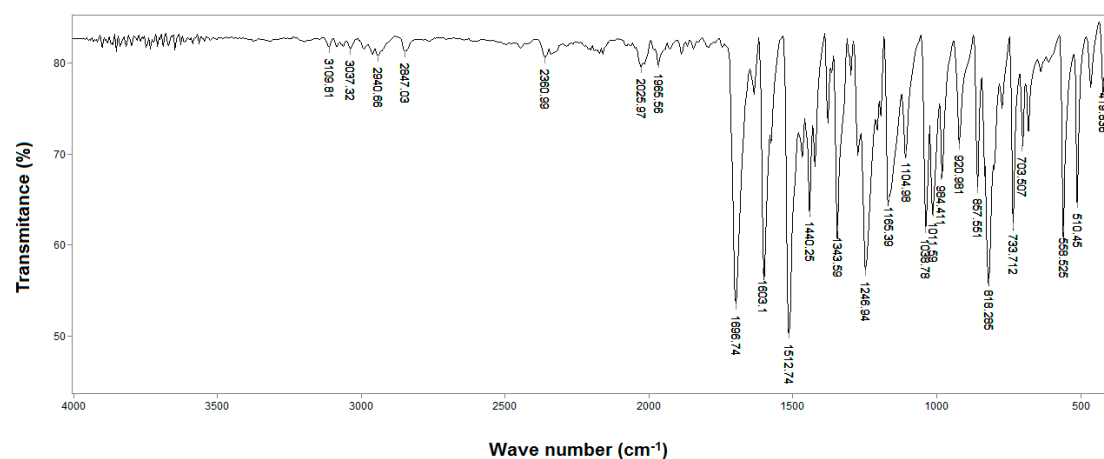

Figure S5 – Infrared spectrum (ATR) of 4e.

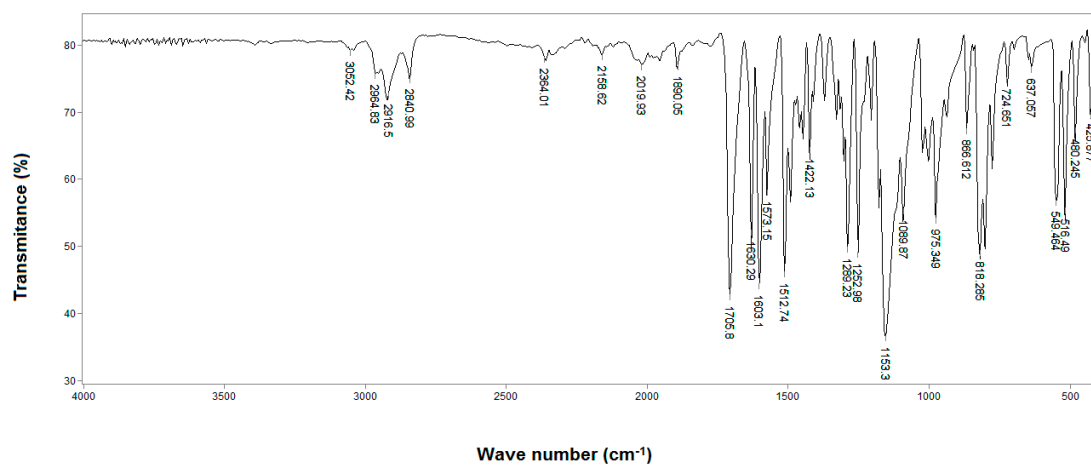

Figure S6 – Infrared spectrum (ATR) of 4f.

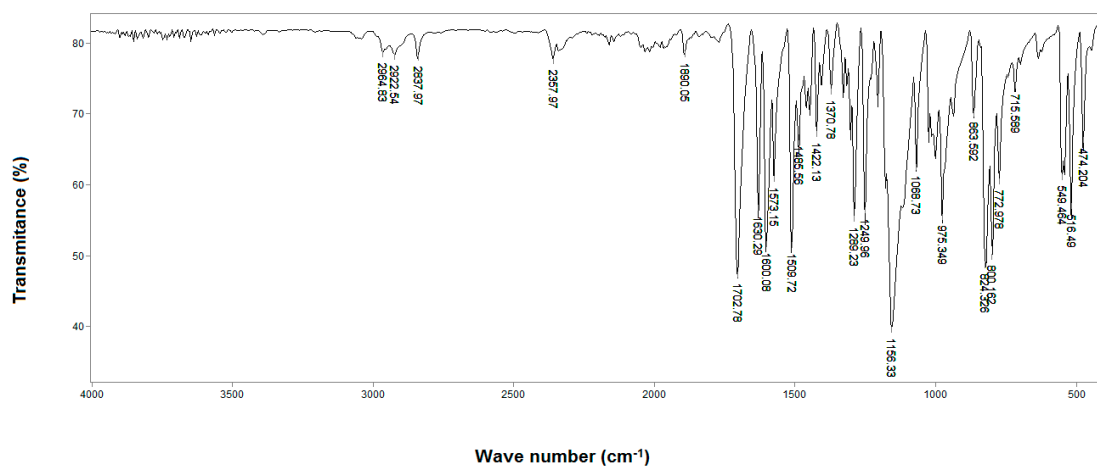

Figure S7 – Infrared spectrum (ATR) of 4g.

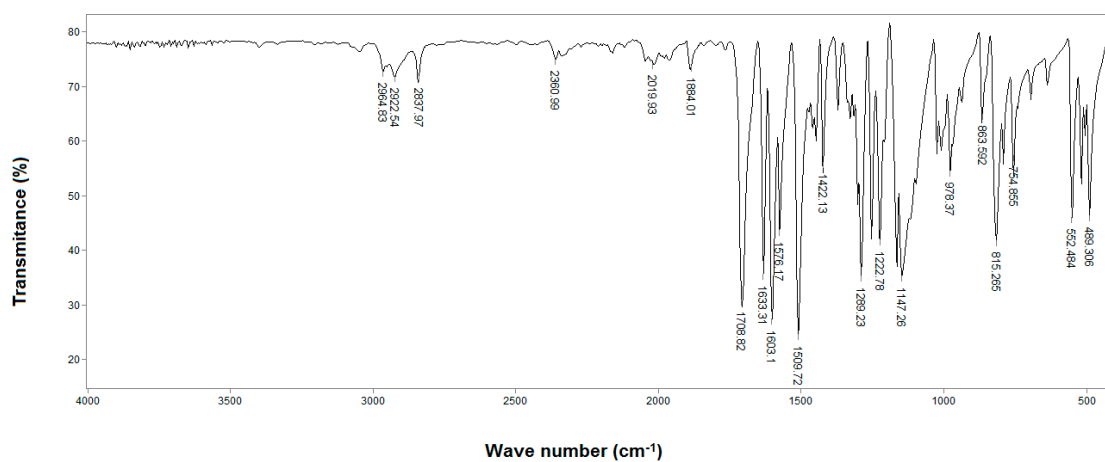

Figure S8 – Infrared spectrum (ATR) of 4h.

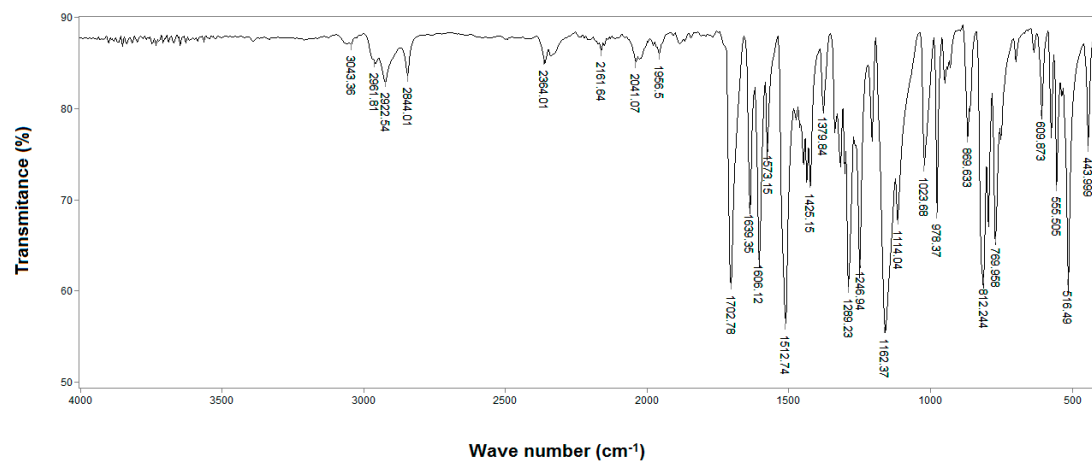

**Figure S9** – Infrared spectrum (ATR) of **4i**.

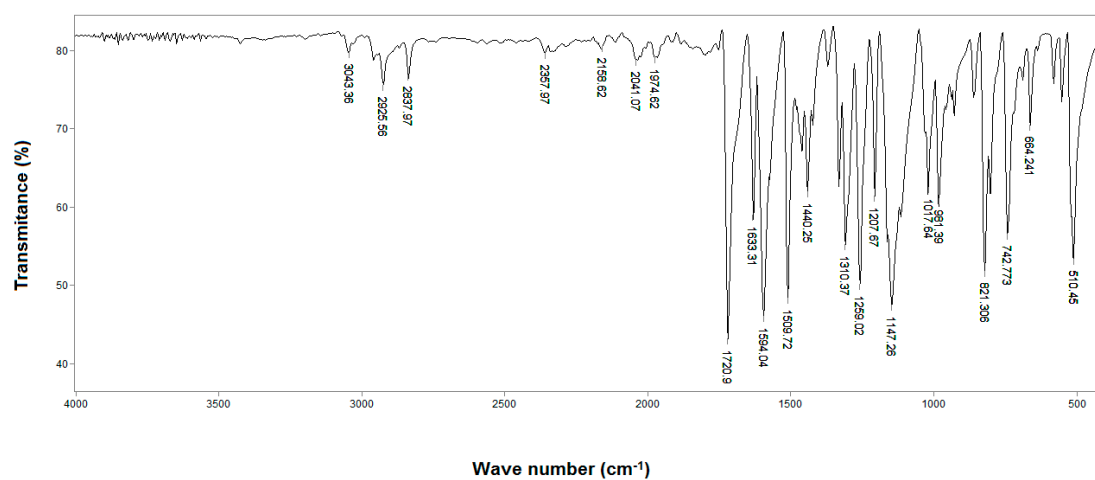

**Figure S10** – Infrared spectrum (ATR) of **4j**.

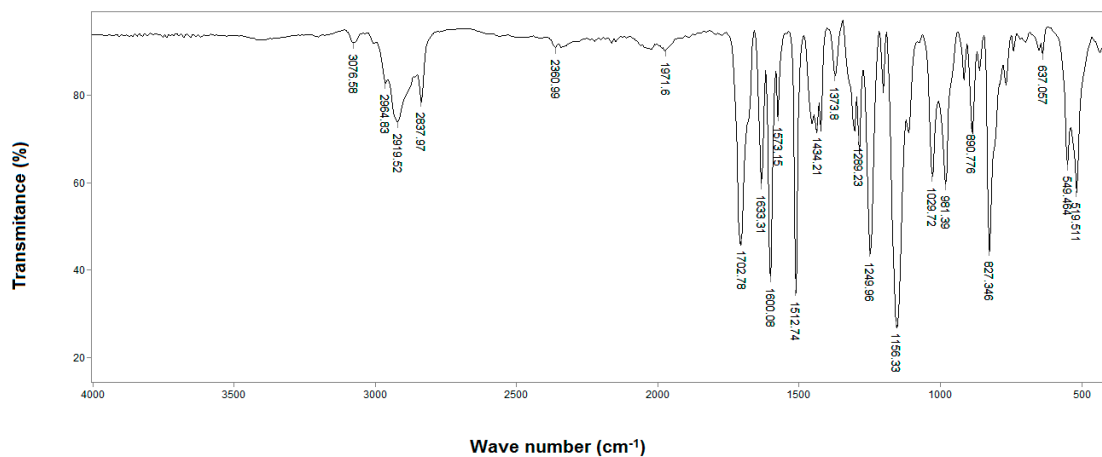

**Figure S11** – Infrared spectrum (ATR) of **4k**.

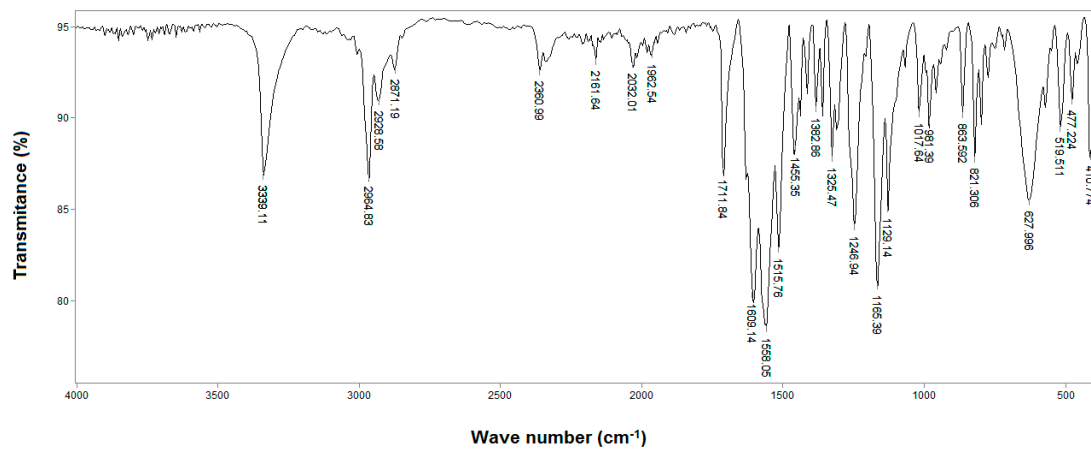

**Figure S12** – Infrared spectrum (ATR) of **4l**.



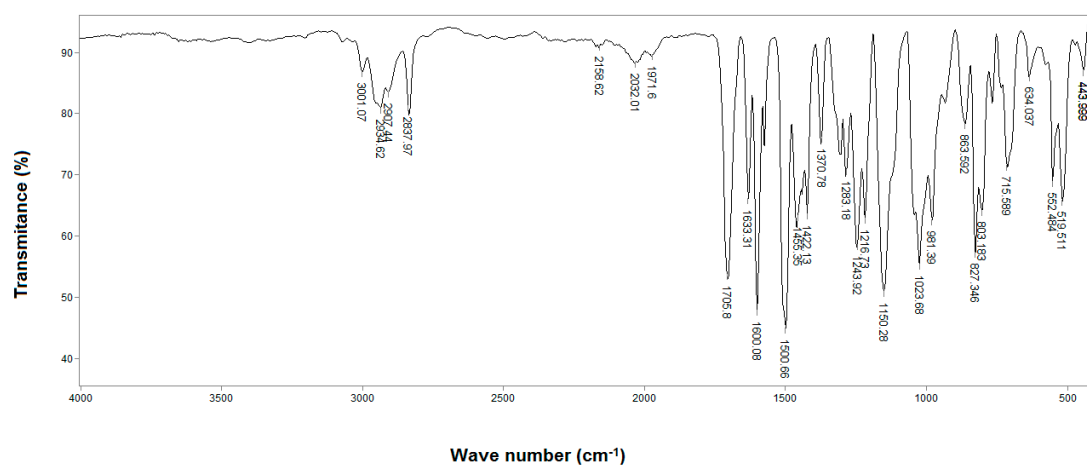

**Figure S13** – Infrared spectrum (ATR) of **4m**.

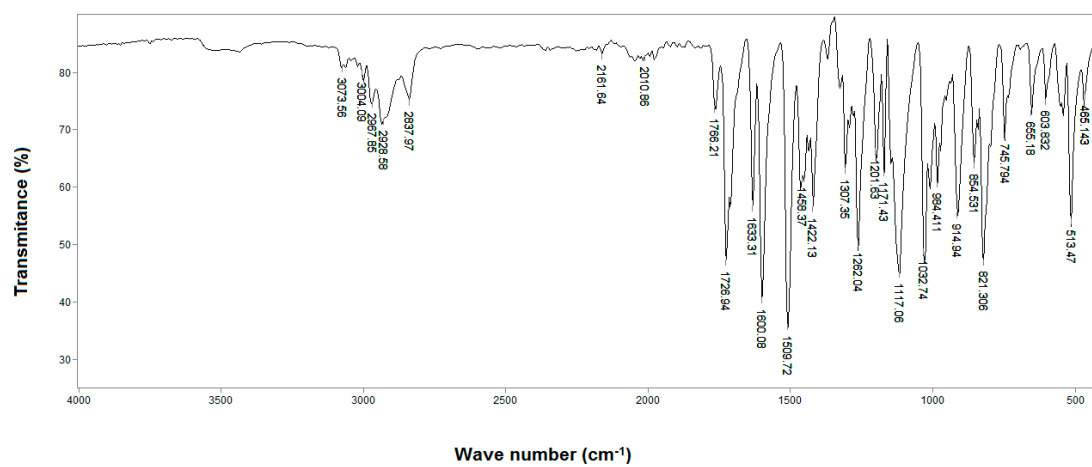

**Figure S14** – Infrared spectrum (ATR) of **4n**.

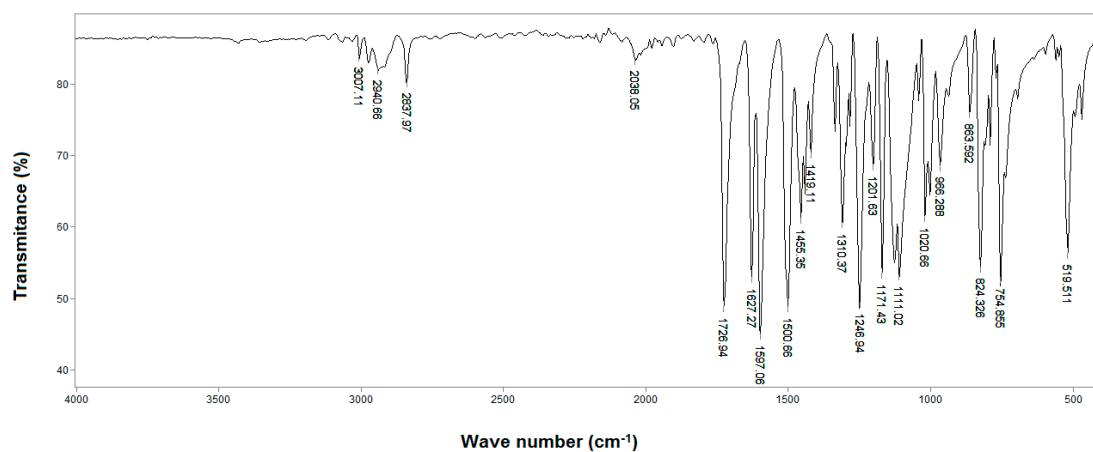

Figure S15 – Infrared spectrum (ATR) of 4o.

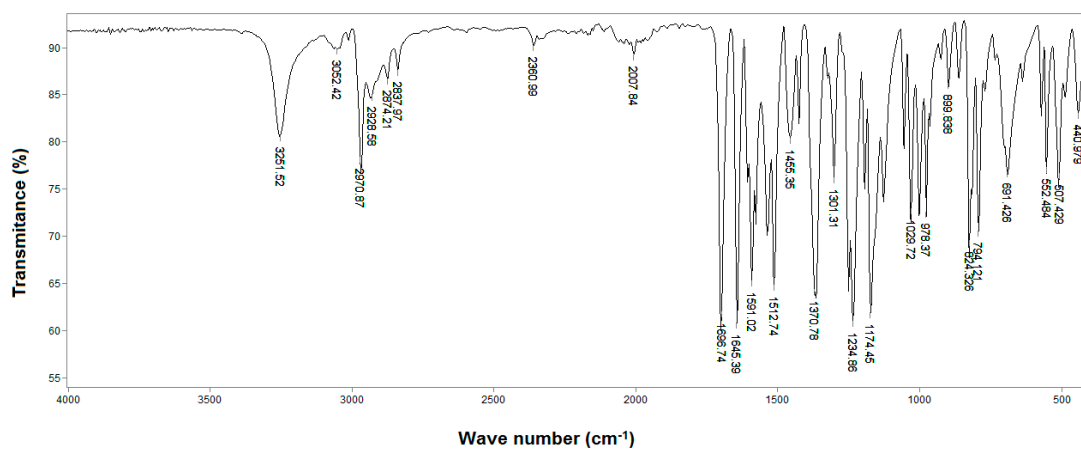

Figure S16 – Infrared spectrum (ATR) of 4p.

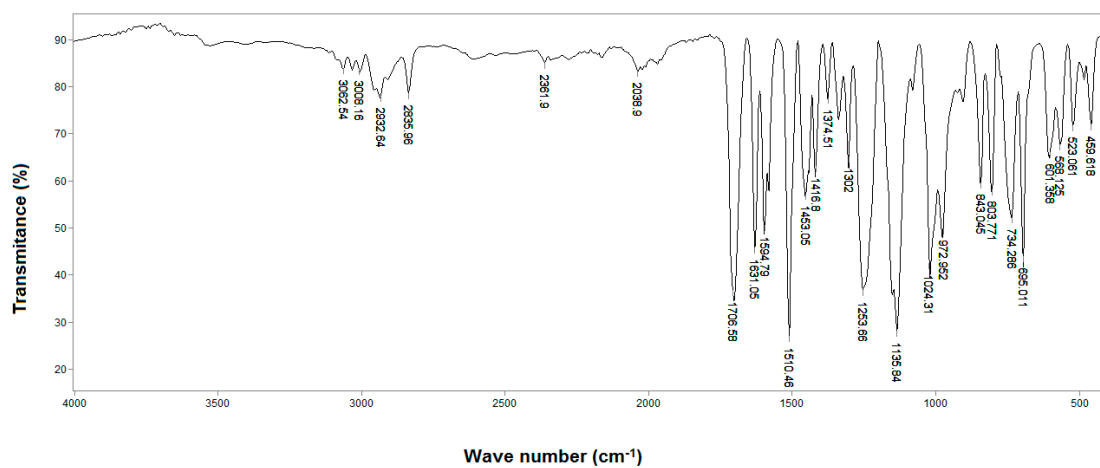

**Figure S17** – Infrared spectrum (ATR) of **5a**.

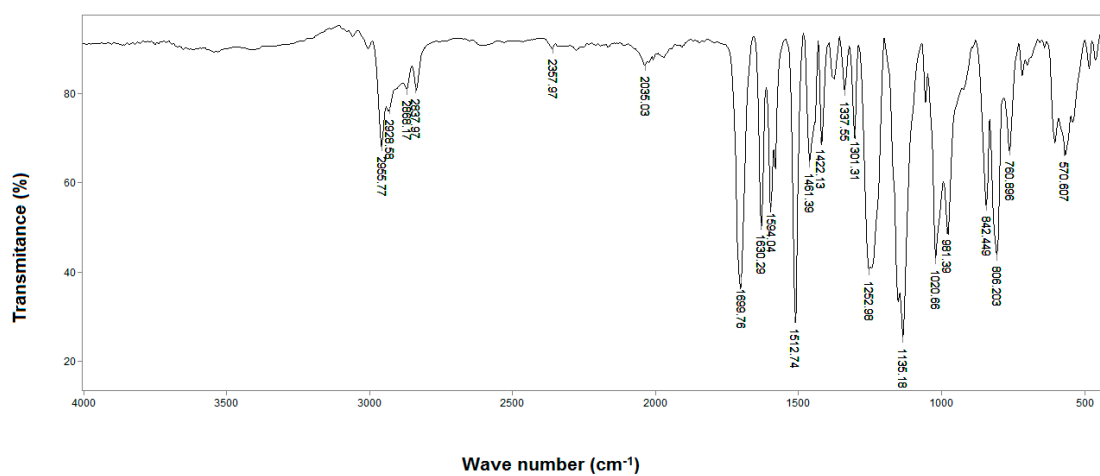

**Figure S18** – Infrared spectrum (ATR) of **5b**.

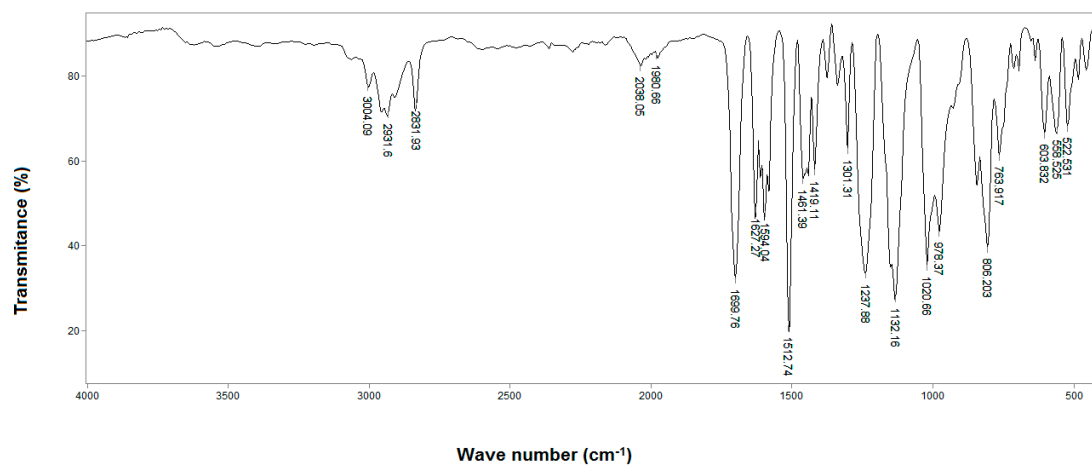

**Figure S19** – Infrared spectrum (ATR) of **5c**.

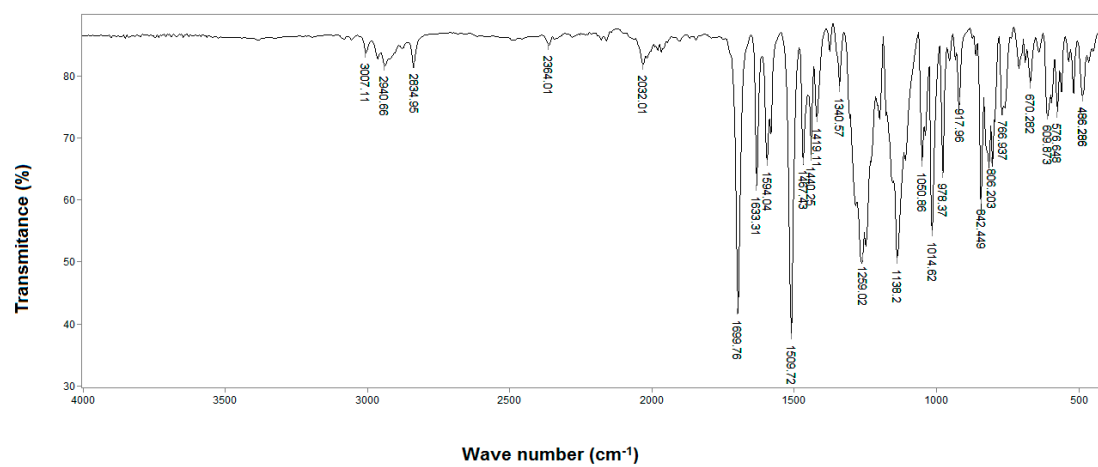

**Figure S20** – Infrared spectrum (ATR) of **5d**.

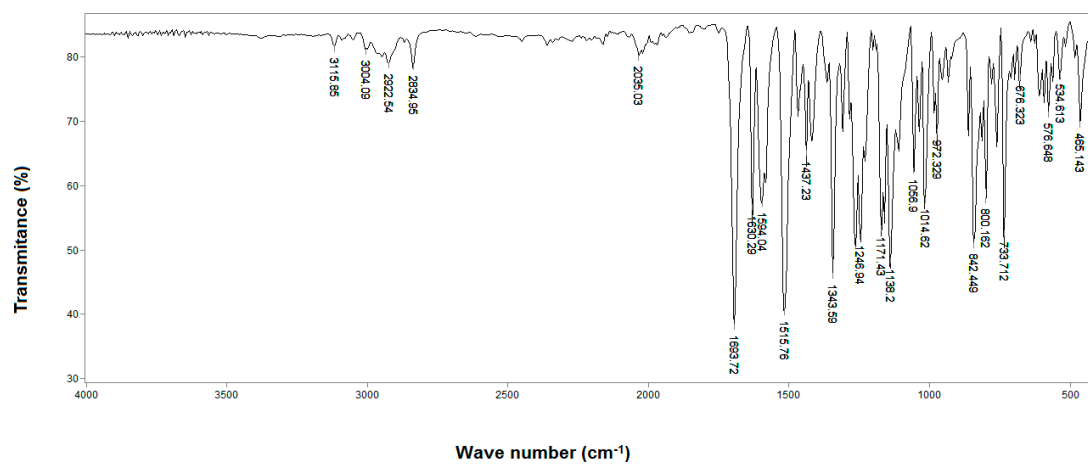

Figure S21 – Infrared spectrum (ATR) of **5e**.

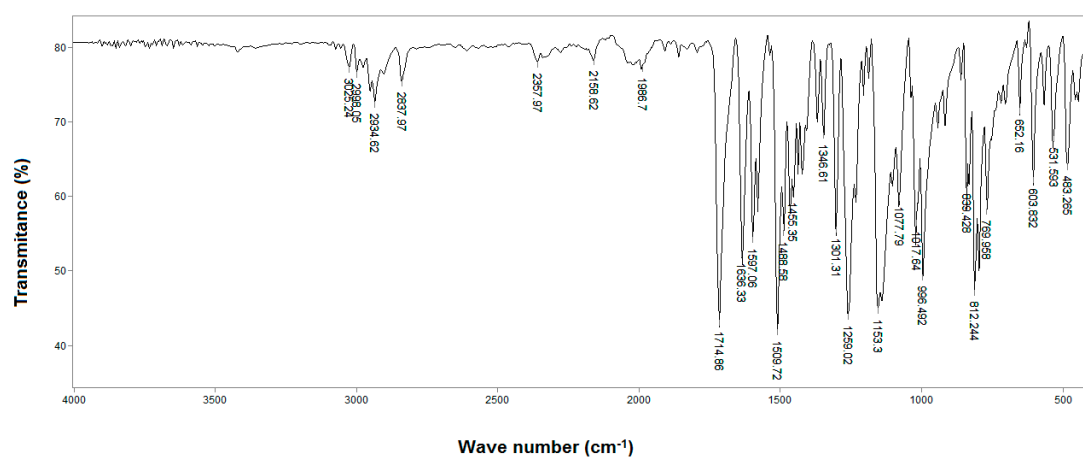

Figure S22 – Infrared spectrum (ATR) of **5f**.

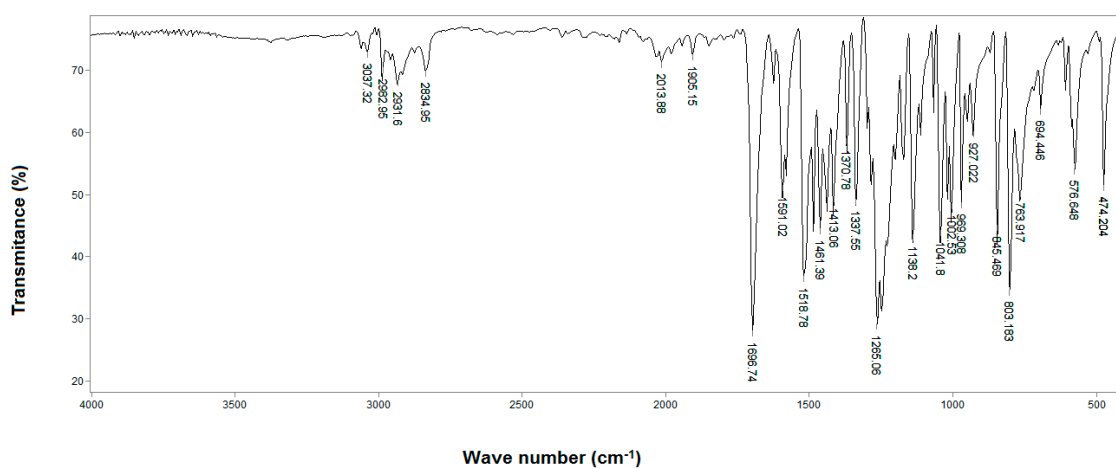

**Figure S23** – Infrared spectrum (ATR) of **5g**.

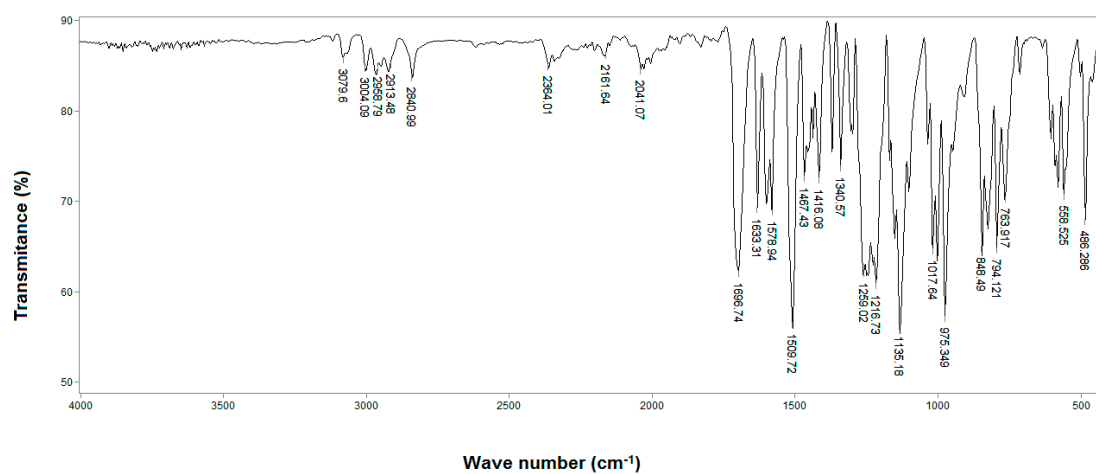

**Figure S24** – Infrared spectrum (ATR) of **5h**.

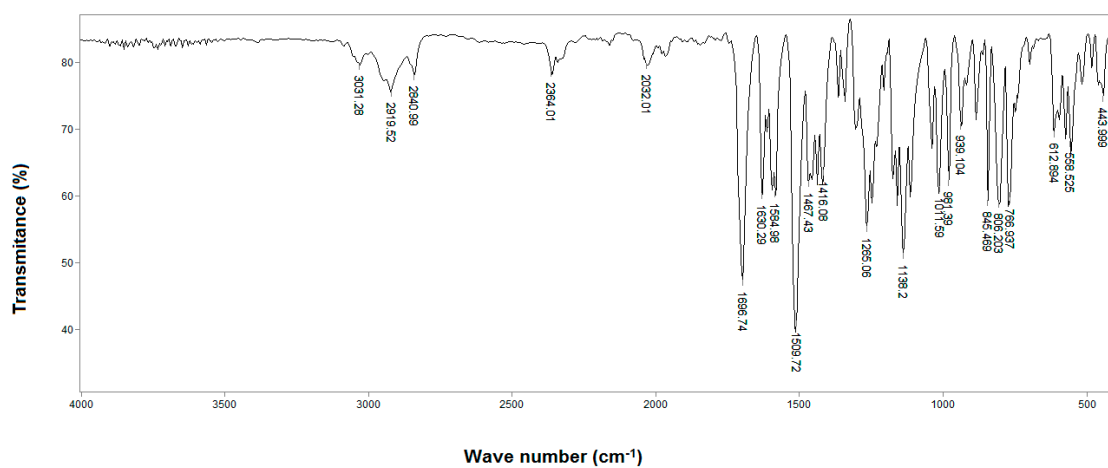

**Figure S25** – Infrared spectrum (ATR) of **5i**.

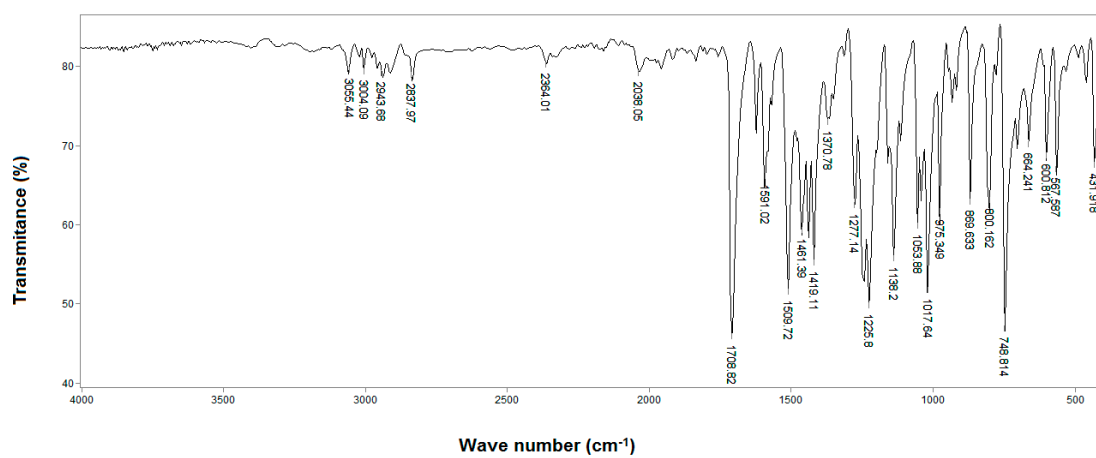

**Figure S26** – Infrared spectrum (ATR) of **5j**.

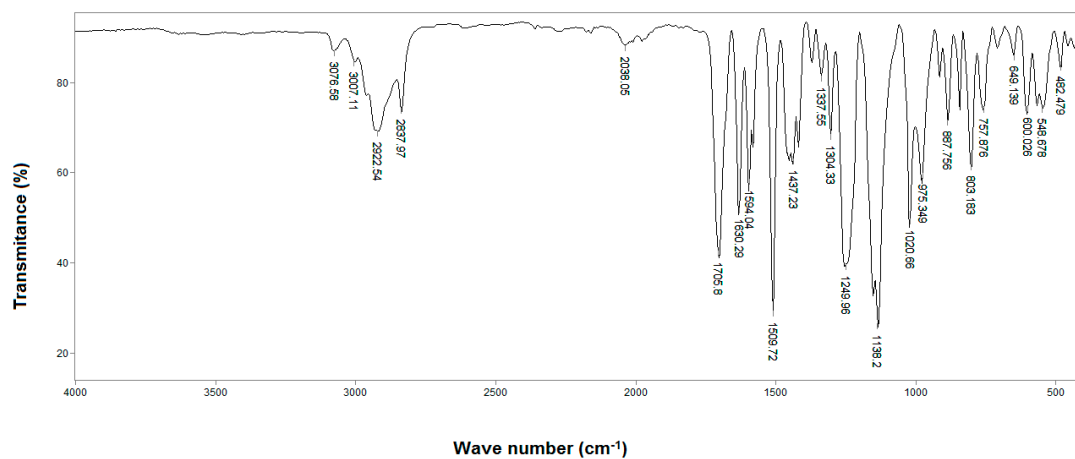

Figure S27 – Infrared spectrum (ATR) of 5k.

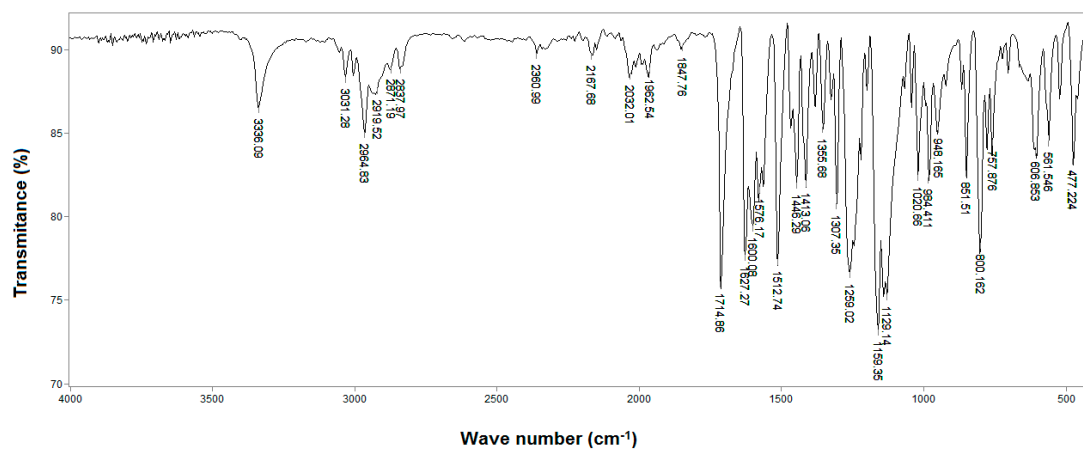

Figure S28 – Infrared spectrum (ATR) of 5l.



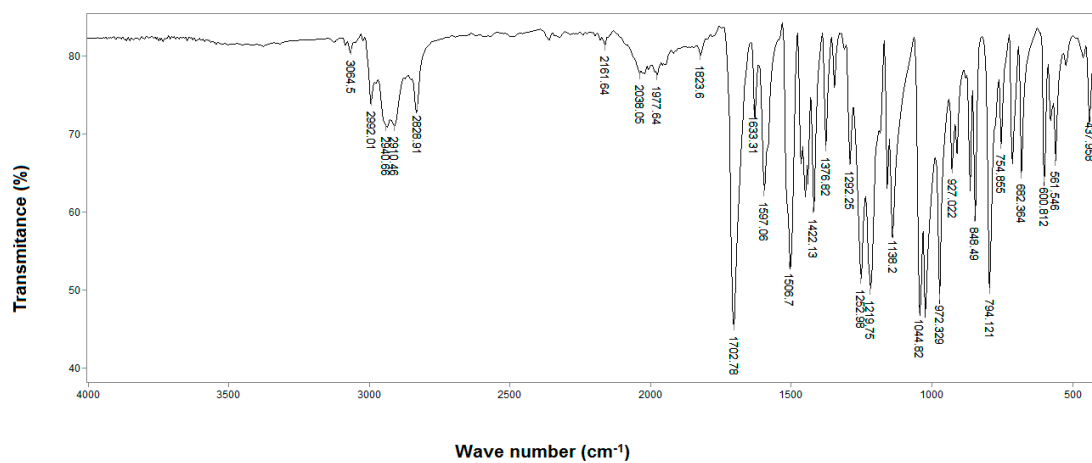

Figure S29 – Infrared spectrum (ATR) of 5m.

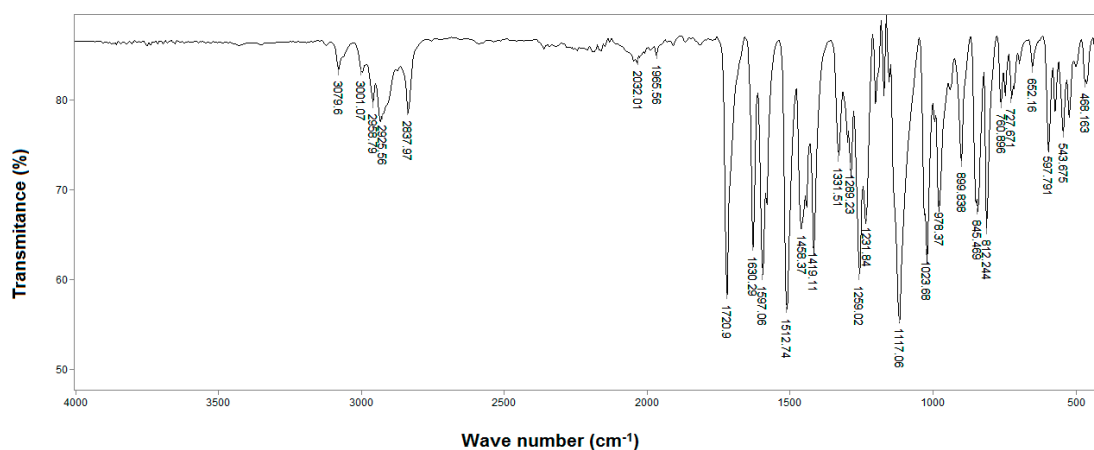

Figure S30 – Infrared spectrum (ATR) of 5n.

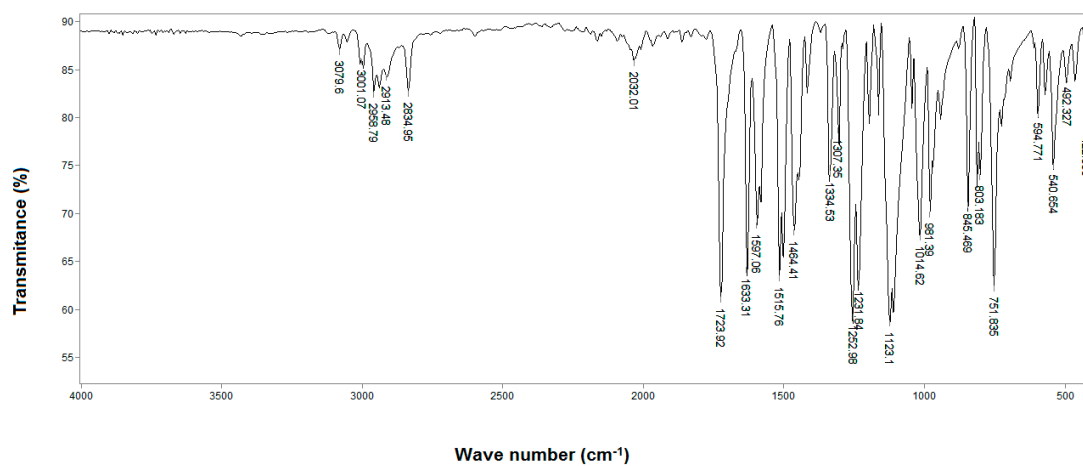

Figure S31 – Infrared spectrum (ATR) of 5o.

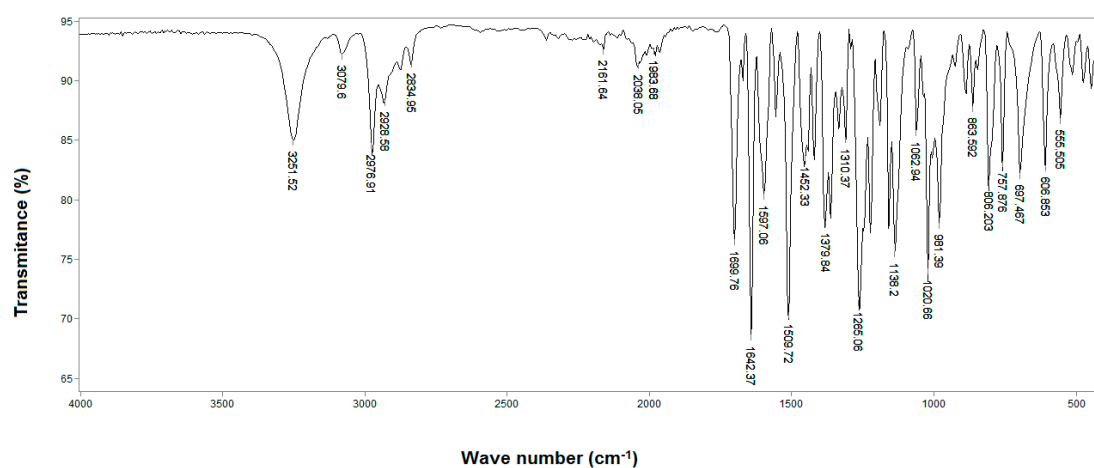

Figure S32 – Infrared spectrum (ATR) of 5p.

**$^1\text{H}$  NUCLEAR MAGNETIC RESONANCE (NMR) SPECTRA OF  
COMPOUNDS 4a–4p AND 5a–5p**

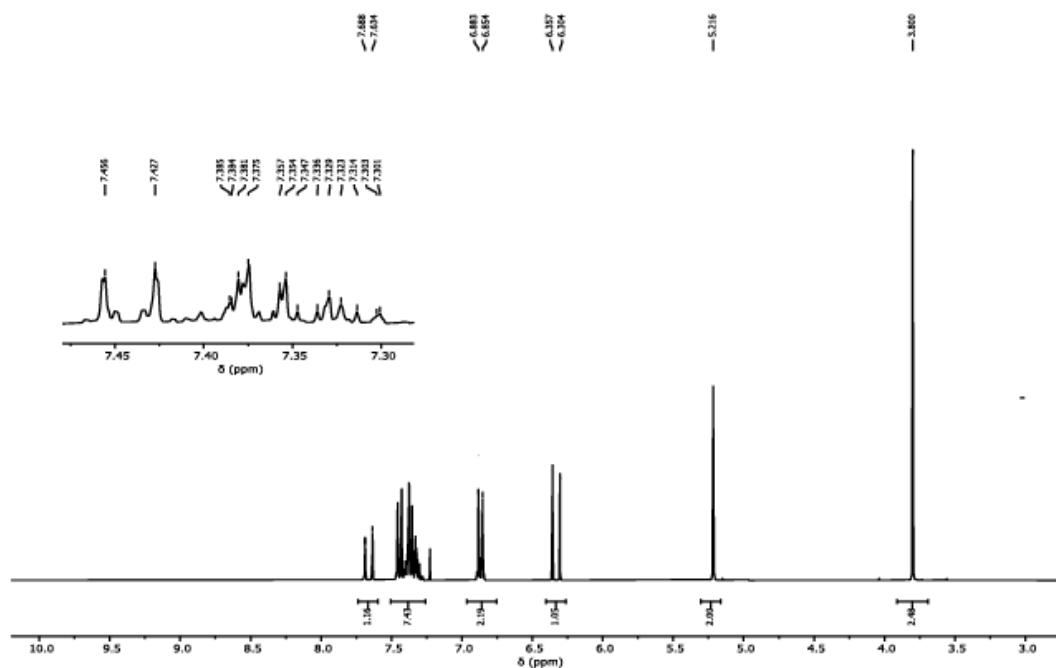

**Figure S33** – <sup>1</sup>H NMR spectrum (300 MHz, CDCl<sub>3</sub>) of **4a**.

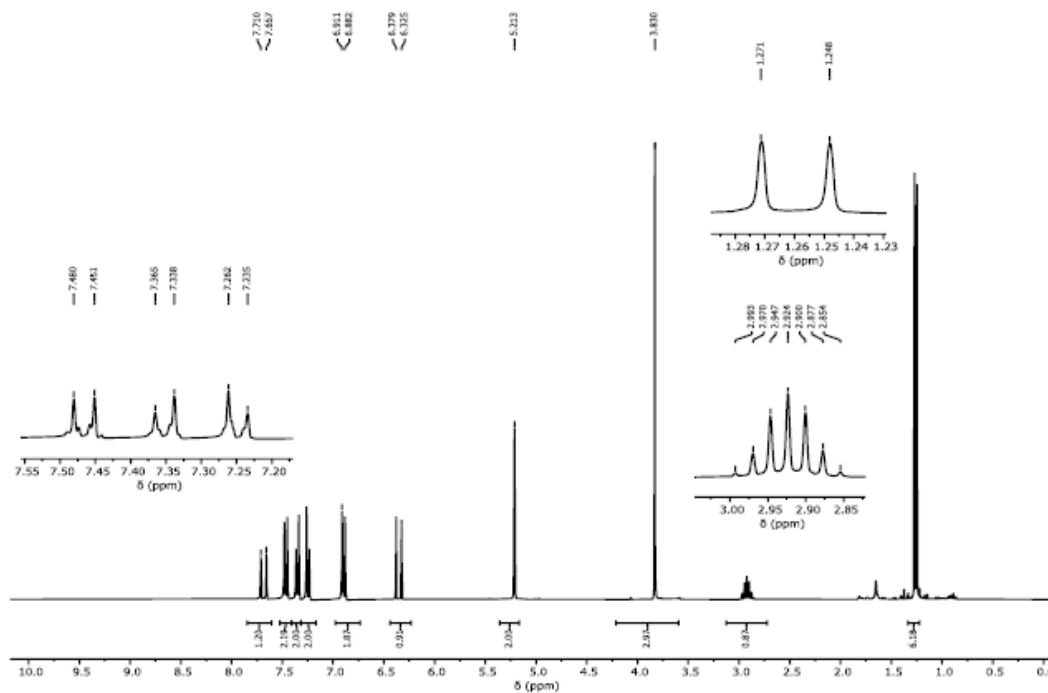

**Figure S34** – <sup>1</sup>H NMR spectrum (300 MHz, CDCl<sub>3</sub>) of **4b**.

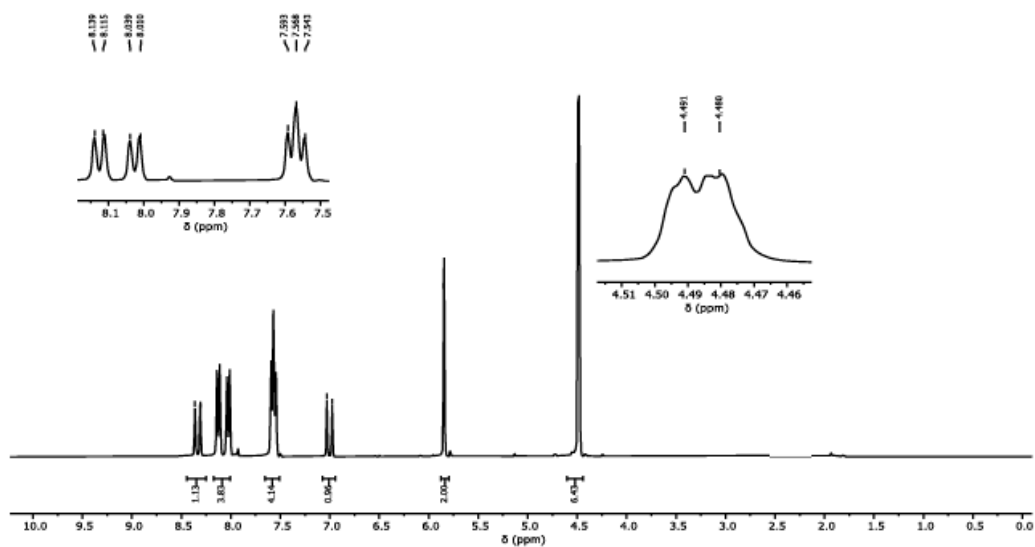

Figure S35 – <sup>1</sup>H NMR spectrum (300 MHz, CDCl<sub>3</sub>) of **4c**.

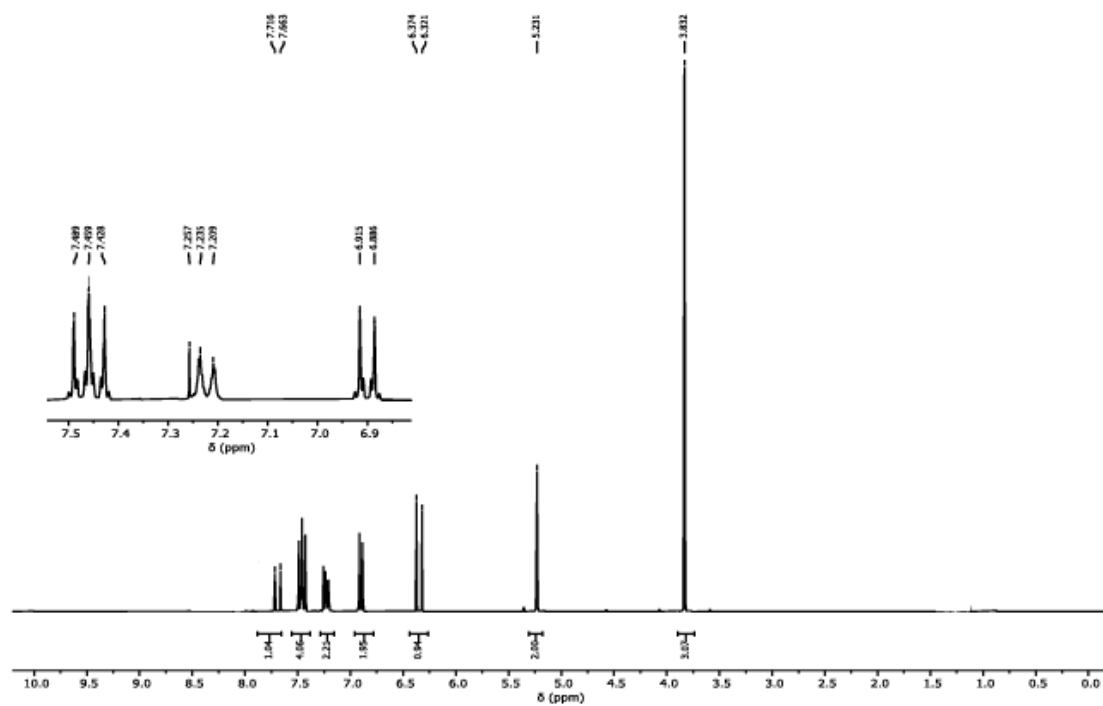

Figure S36 – <sup>1</sup>H NMR spectrum (300 MHz, CDCl<sub>3</sub>) of **4d**.

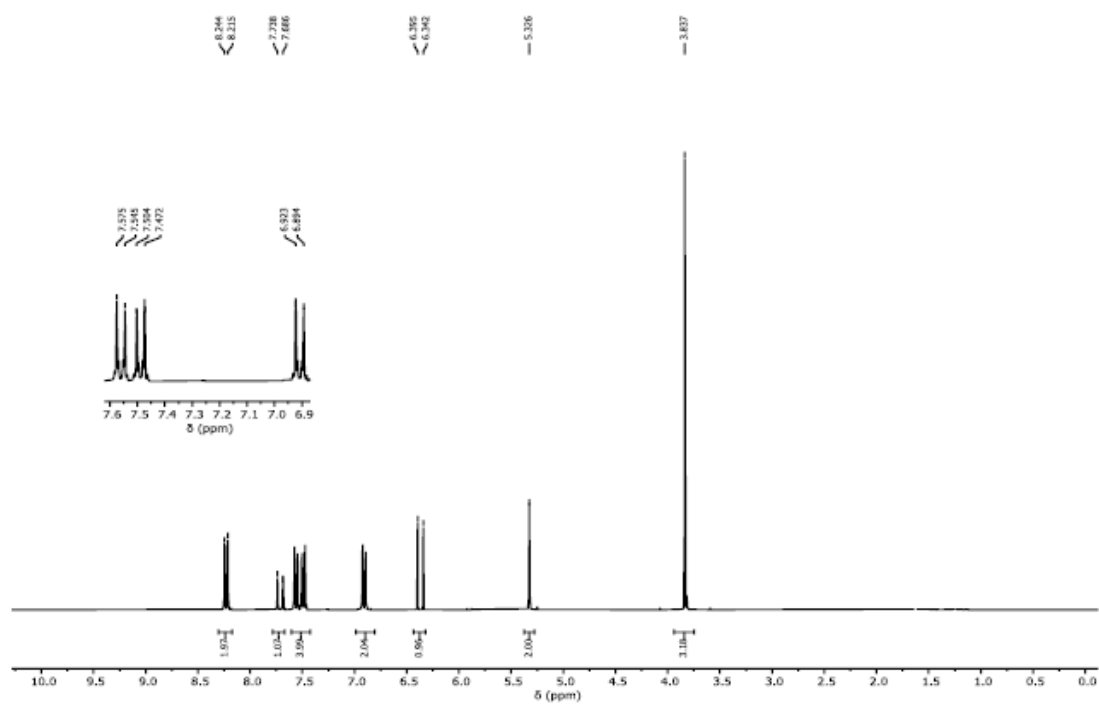

Figure S37 – <sup>1</sup>H NMR spectrum (300 MHz, CDCl<sub>3</sub>) of **4e**.

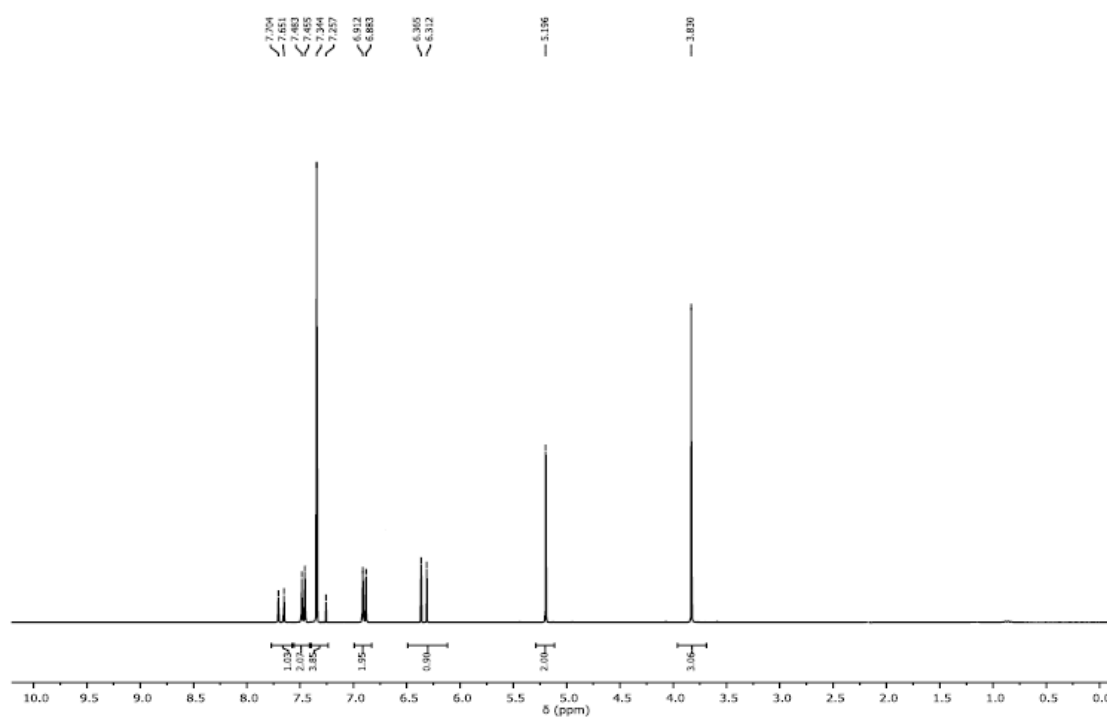

Figure S38 – <sup>1</sup>H NMR spectrum (300 MHz, CDCl<sub>3</sub>) of **4f**.

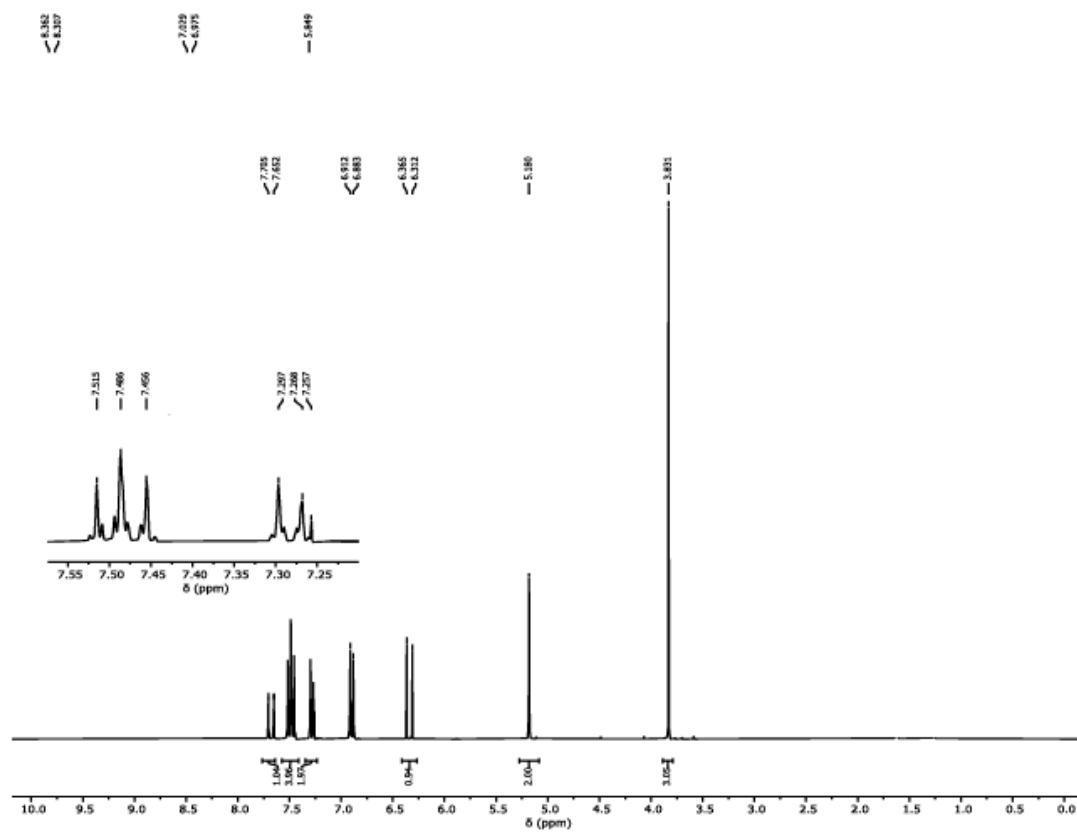

**Figure S39** – <sup>1</sup>H NMR spectrum (300 MHz, CDCl<sub>3</sub>) of **4g**.

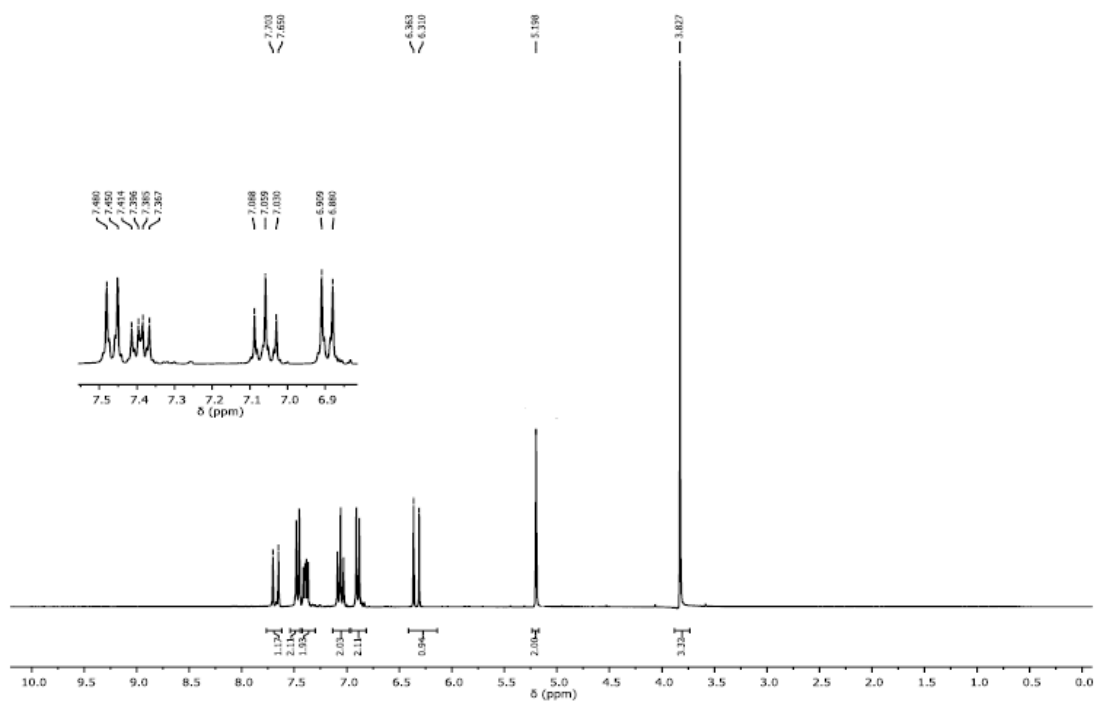

**Figure S40** – <sup>1</sup>H NMR spectrum (300 MHz, CDCl<sub>3</sub>) of **4h**.

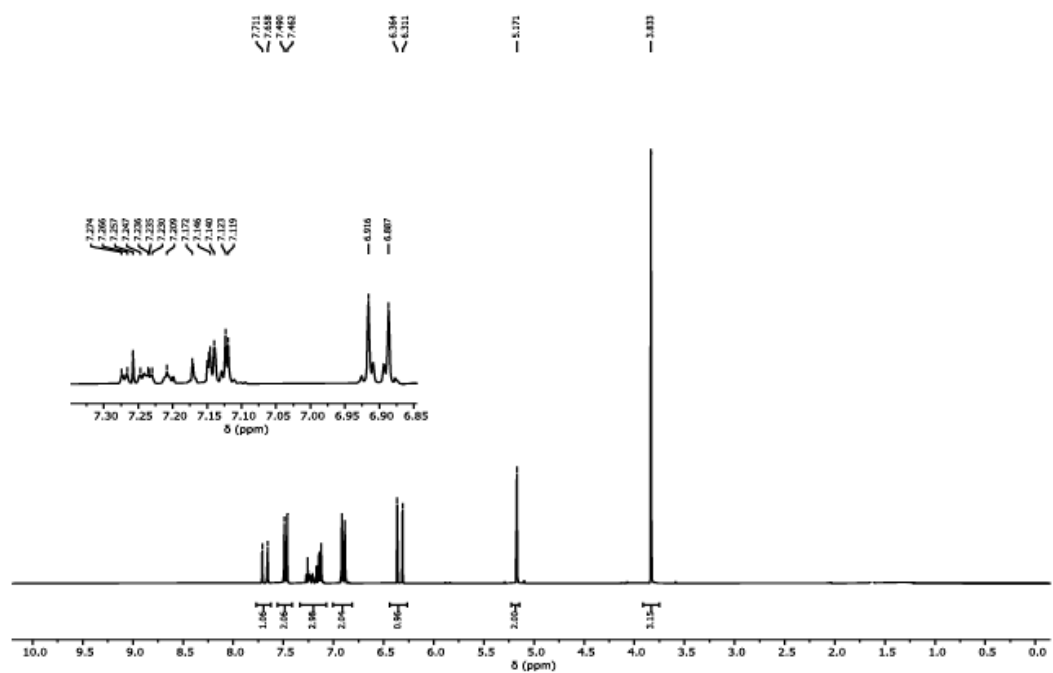

**Figure S41** – <sup>1</sup>H NMR spectrum (300 MHz, CDCl<sub>3</sub>) of **4i**.

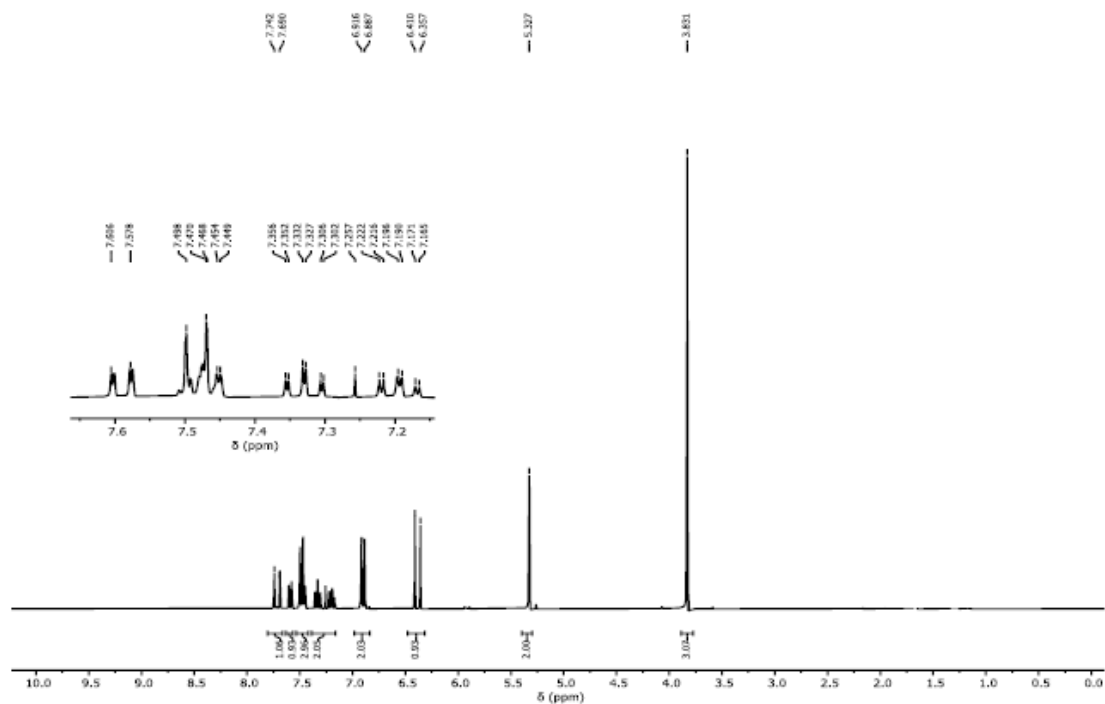

**Figure S42** – <sup>1</sup>H NMR spectrum (300 MHz, CDCl<sub>3</sub>) of **4j**.



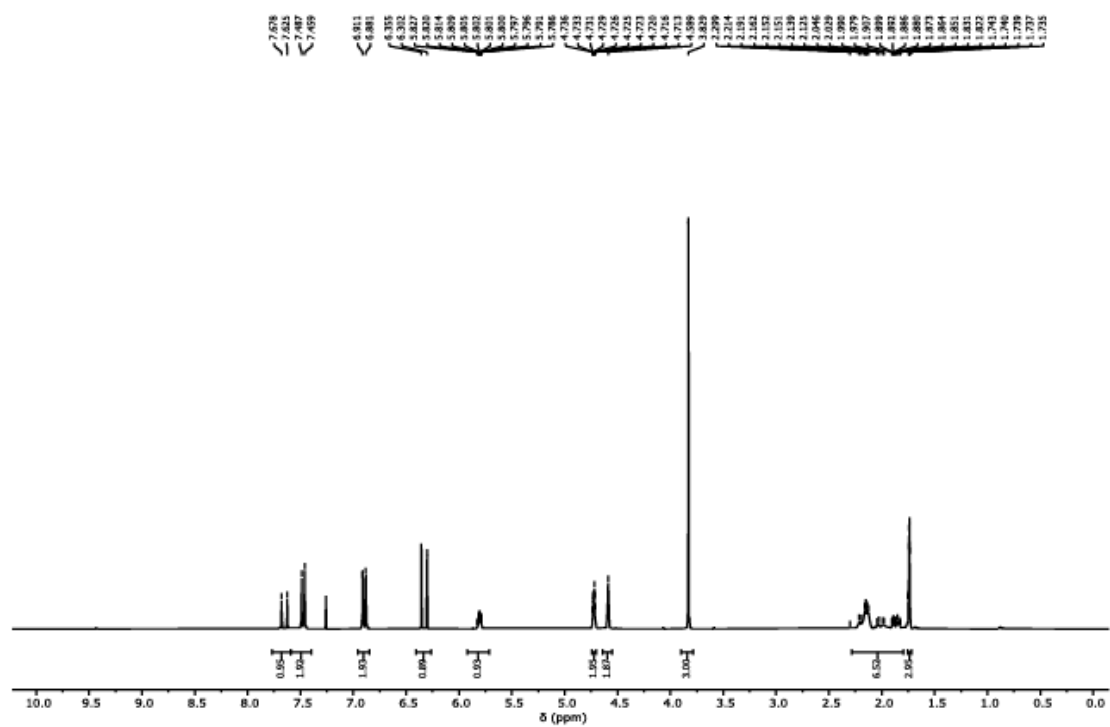

Figure S43 –  $^1\text{H}$  NMR spectrum (300 MHz,  $\text{CDCl}_3$ ) of **4k**.

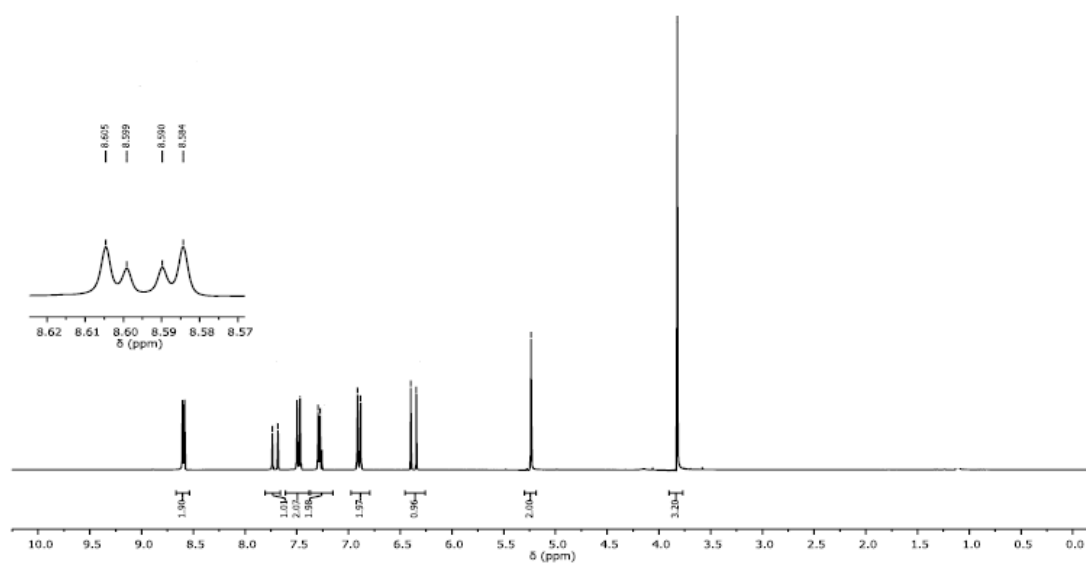

Figure S44 –  $^1\text{H}$  NMR spectrum (300 MHz,  $\text{CDCl}_3$ ) of **4l**.

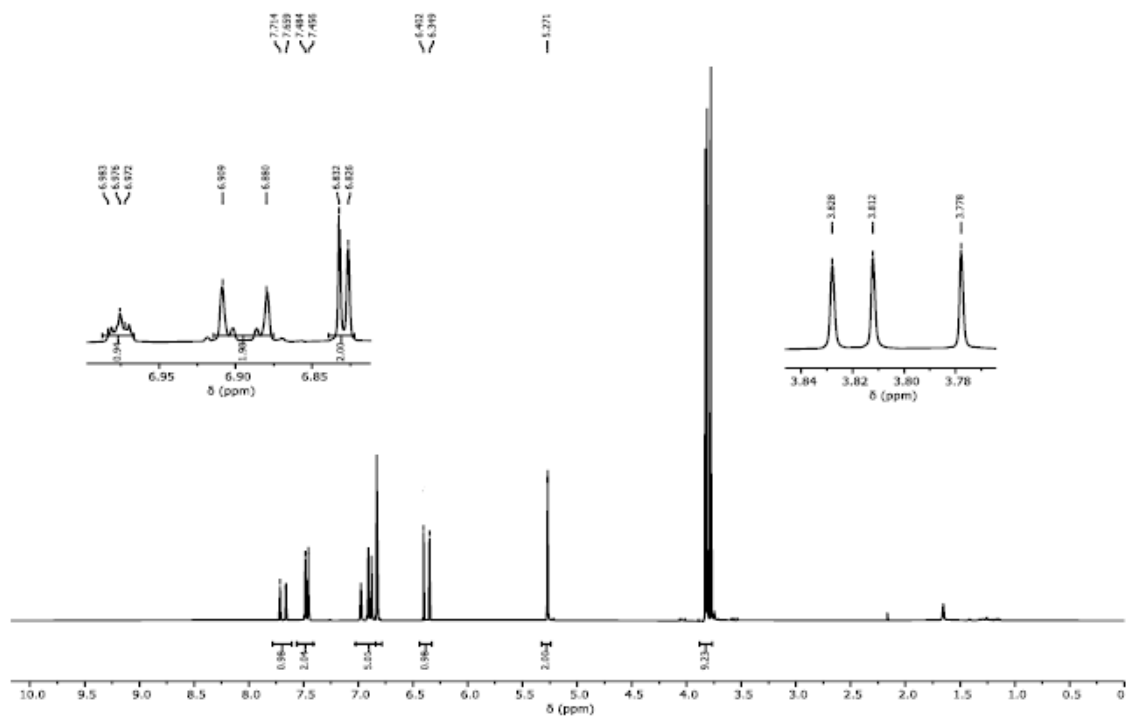

**Figure S45** – <sup>1</sup>H NMR spectrum (300 MHz, CDCl<sub>3</sub>) of **4m**.

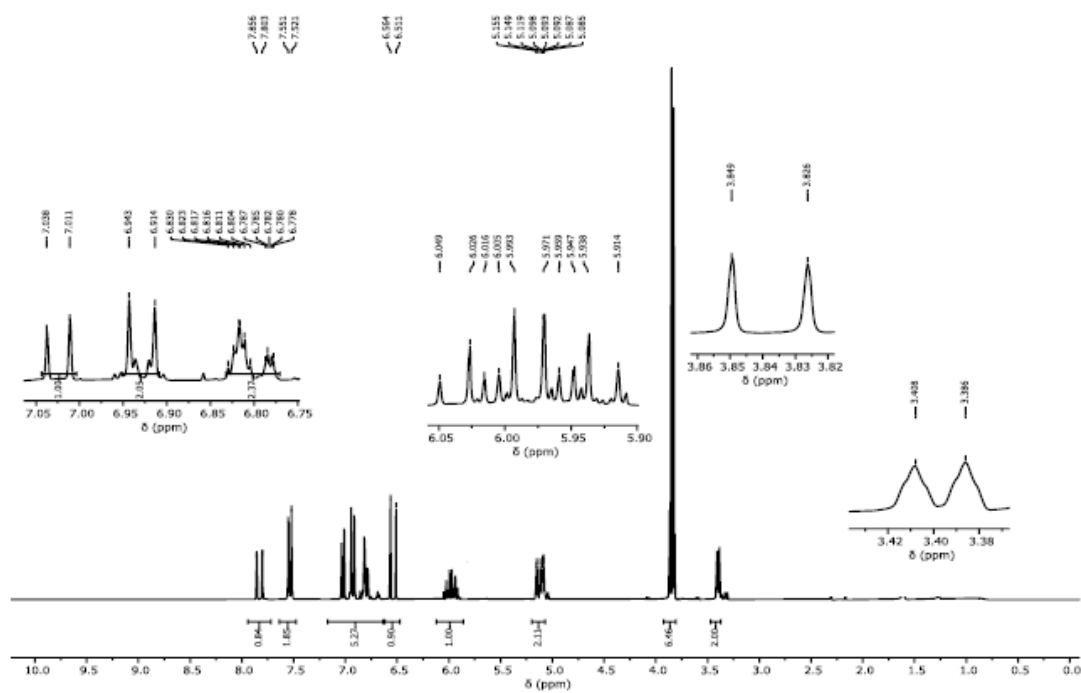

**Figure S46** – <sup>1</sup>H NMR spectrum (300 MHz, CDCl<sub>3</sub>) of **4n**.

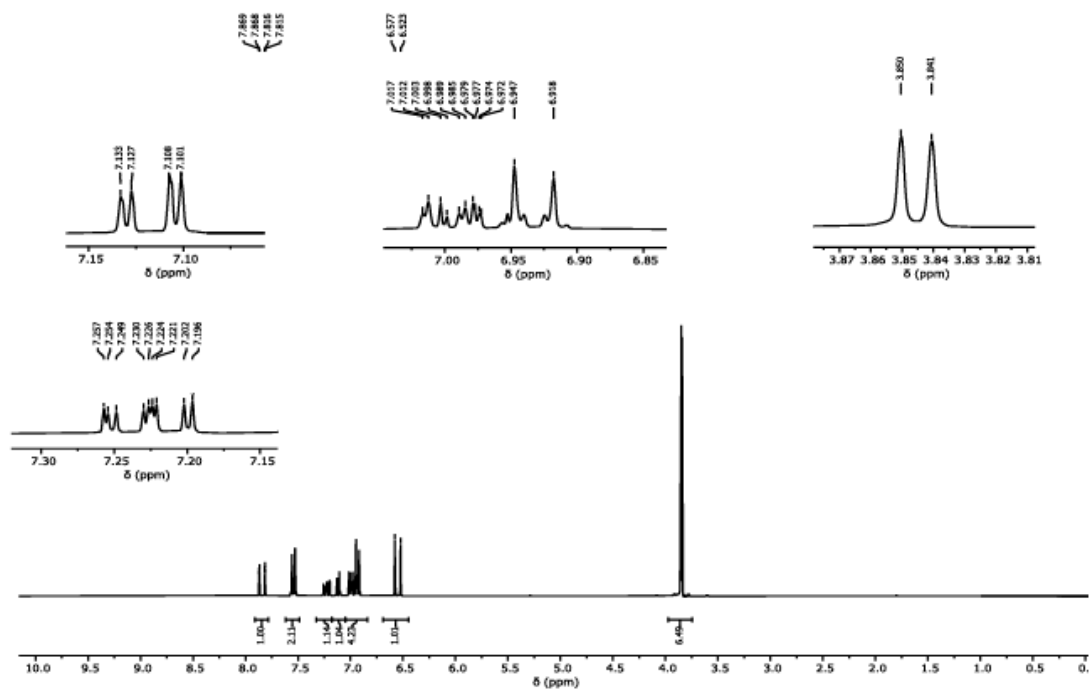

**Figure S47** – <sup>1</sup>H NMR spectrum (300 MHz, CDCl<sub>3</sub>) of **4o**.

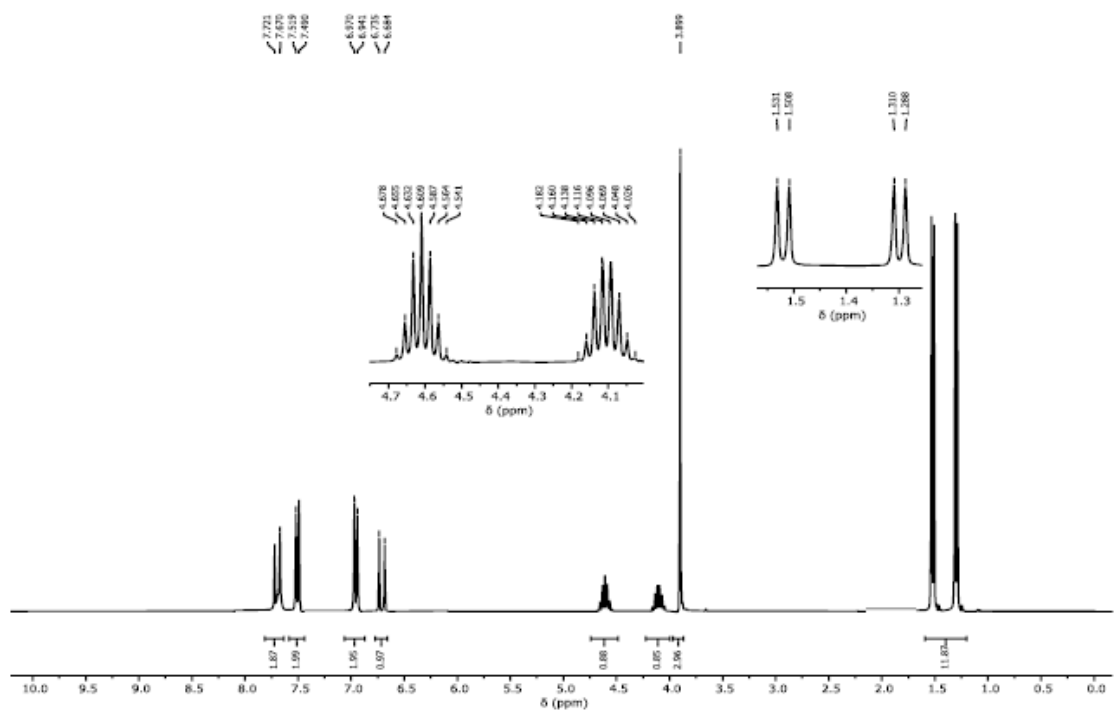

**Figure S48** – <sup>1</sup>H NMR spectrum (300 MHz, CDCl<sub>3</sub>) of **4p**.

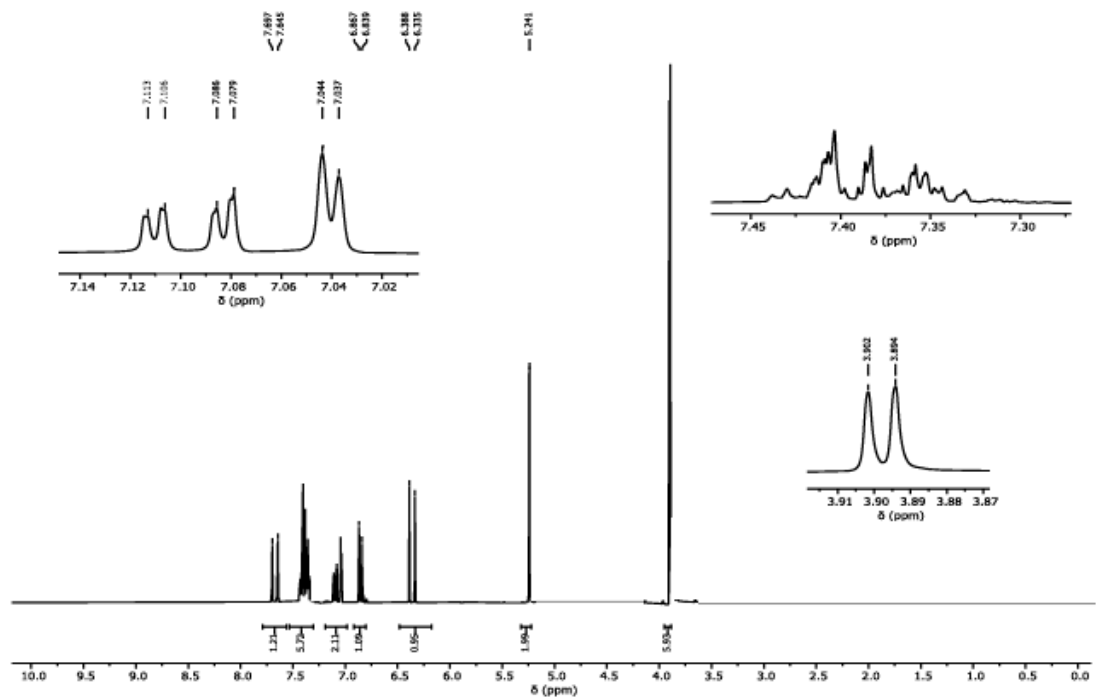

**Figure S49** – <sup>1</sup>H NMR spectrum (300 MHz, CDCl<sub>3</sub>) of **5a**.

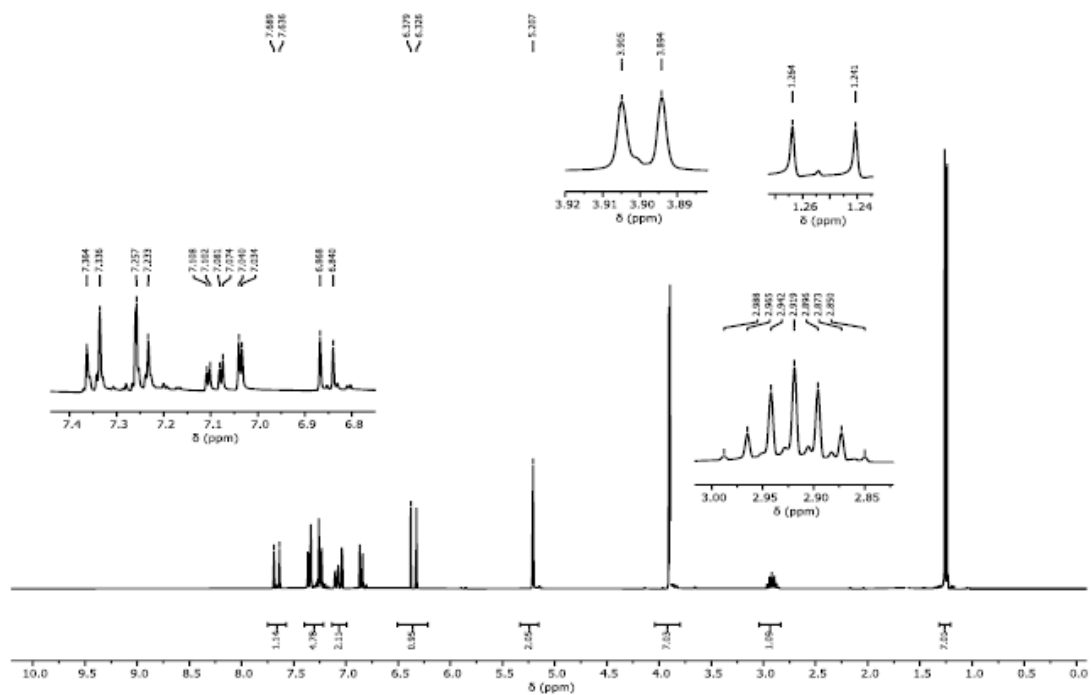

**Figure S50** – <sup>1</sup>H NMR spectrum (300 MHz, CDCl<sub>3</sub>) of **5b**.

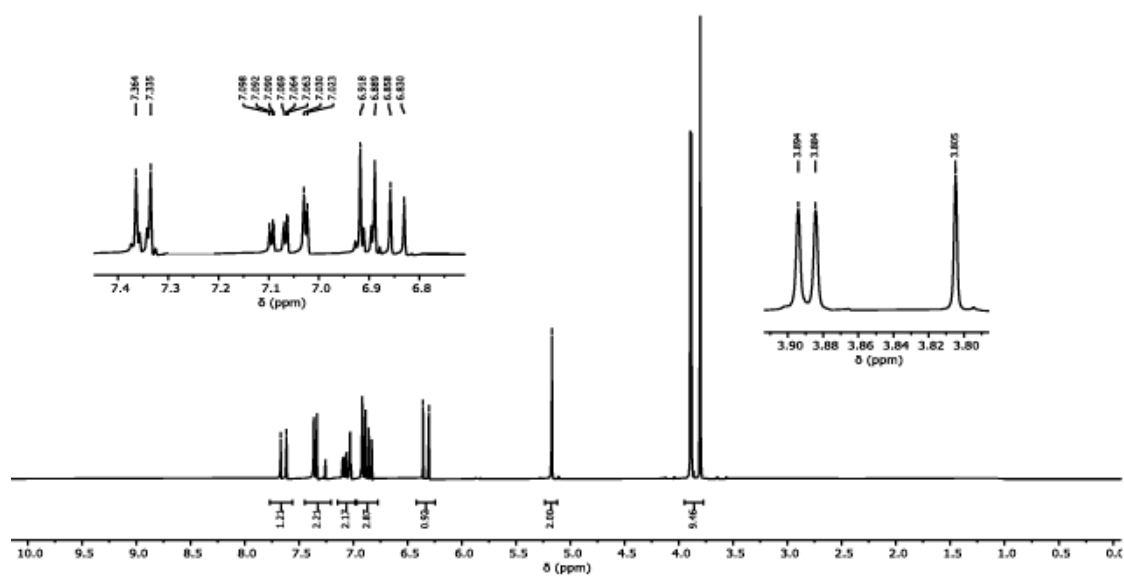

**Figure S51** – <sup>1</sup>H NMR spectrum (300 MHz, CDCl<sub>3</sub>) of **5c**.

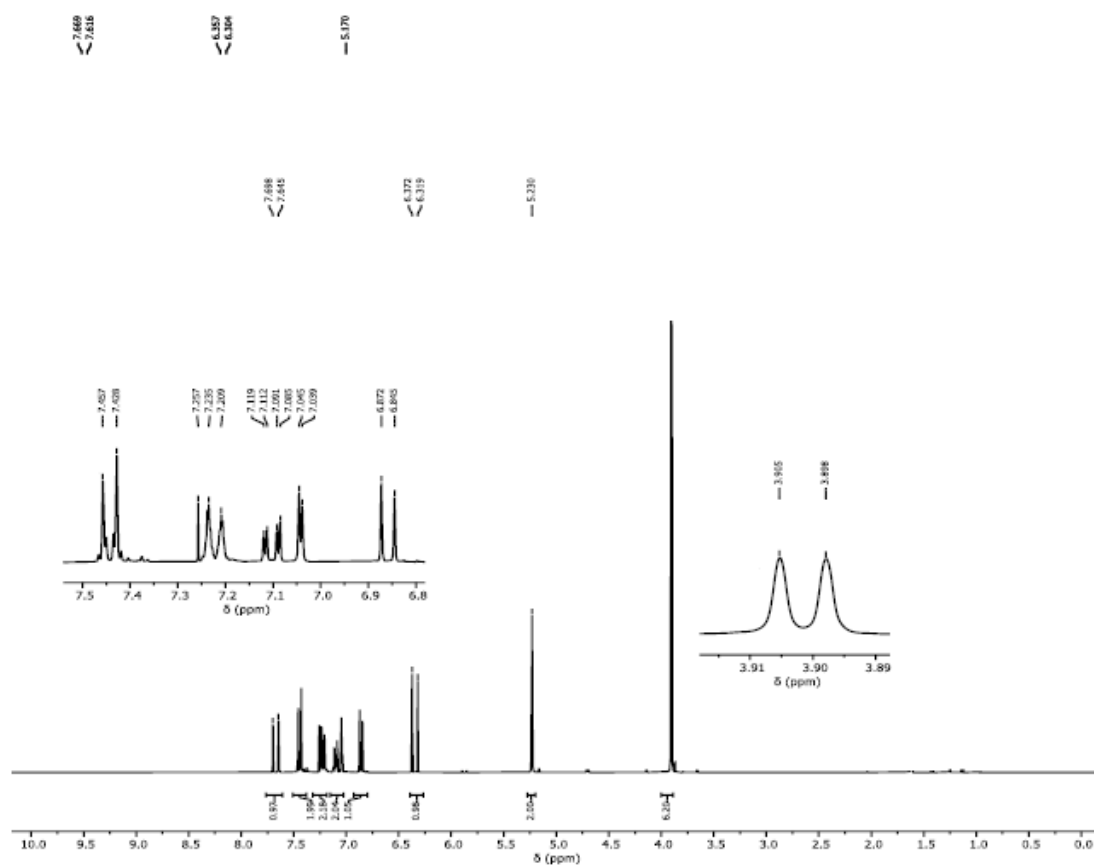

**Figure S52** – <sup>1</sup>H NMR spectrum (300 MHz, CDCl<sub>3</sub>) of **5d**.

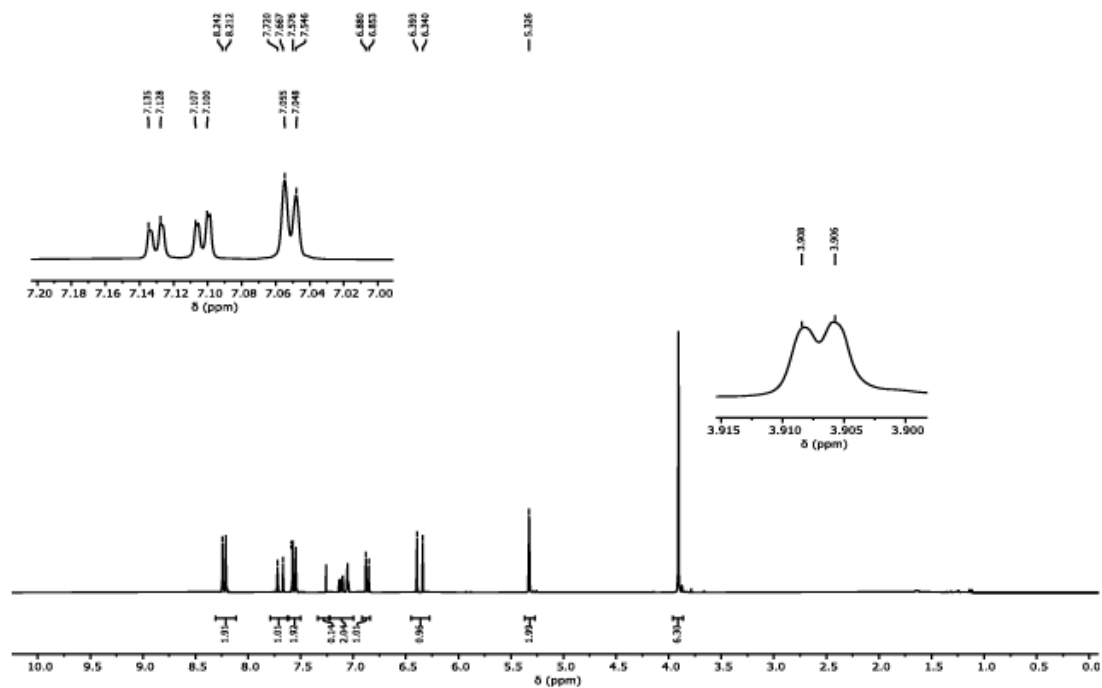

**Figure S53** – <sup>1</sup>H NMR spectrum (300 MHz, CDCl<sub>3</sub>) of **5e**.

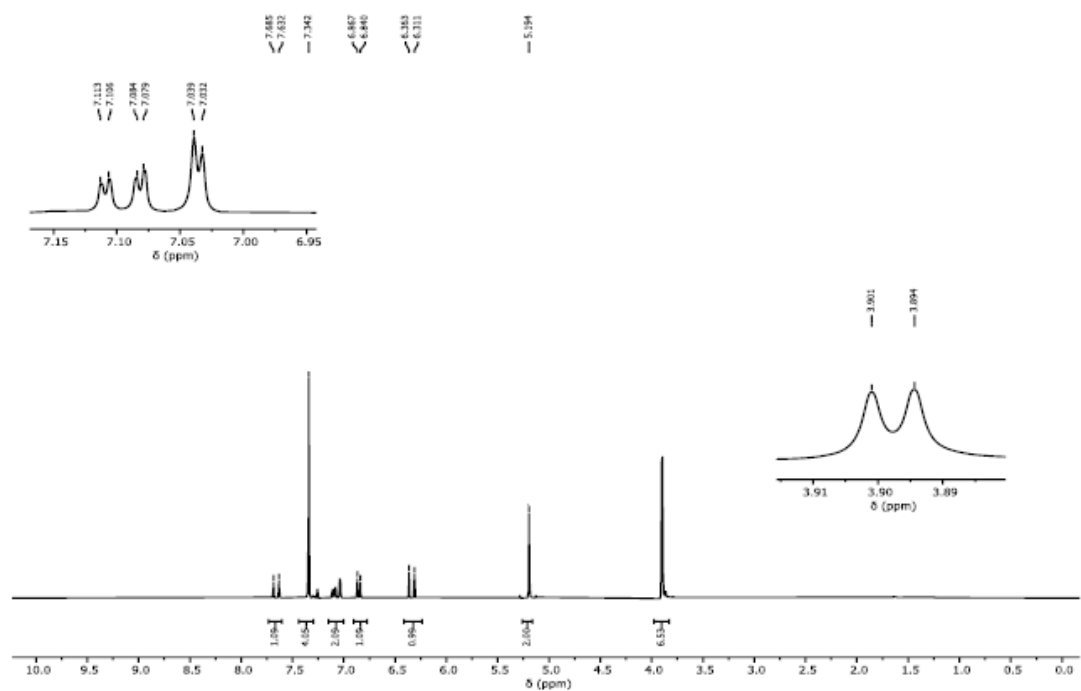

**Figure S54** – <sup>1</sup>H NMR spectrum (300 MHz, CDCl<sub>3</sub>) of **5f**.

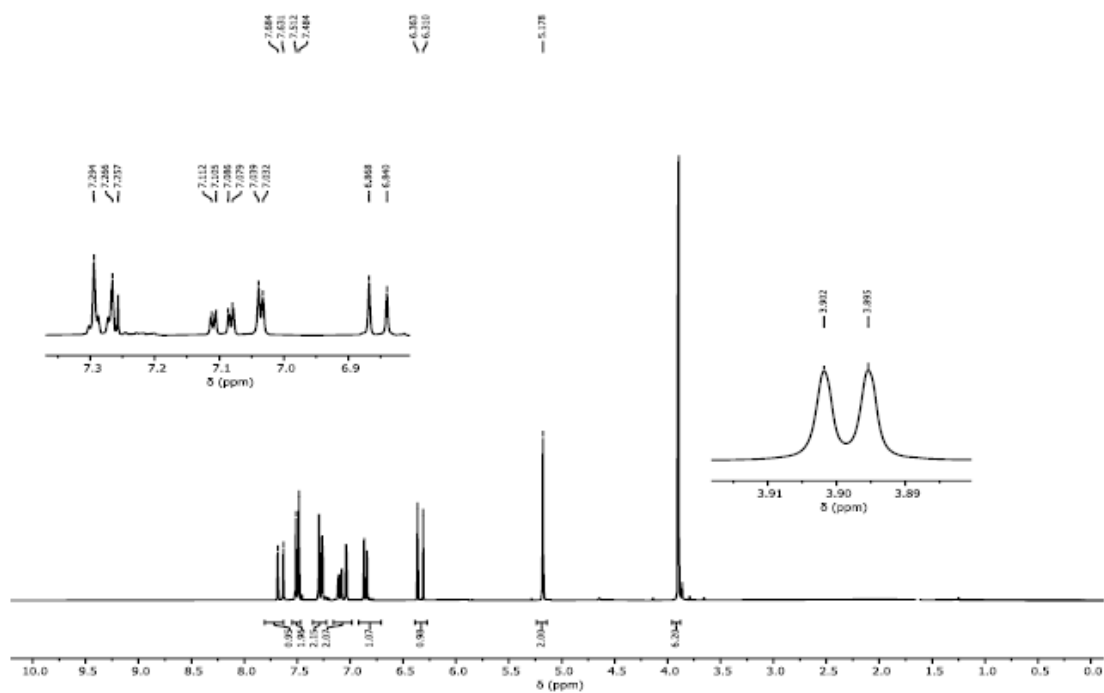

**Figure S55** – <sup>1</sup>H NMR spectrum (300 MHz, CDCl<sub>3</sub>) of **5g**.

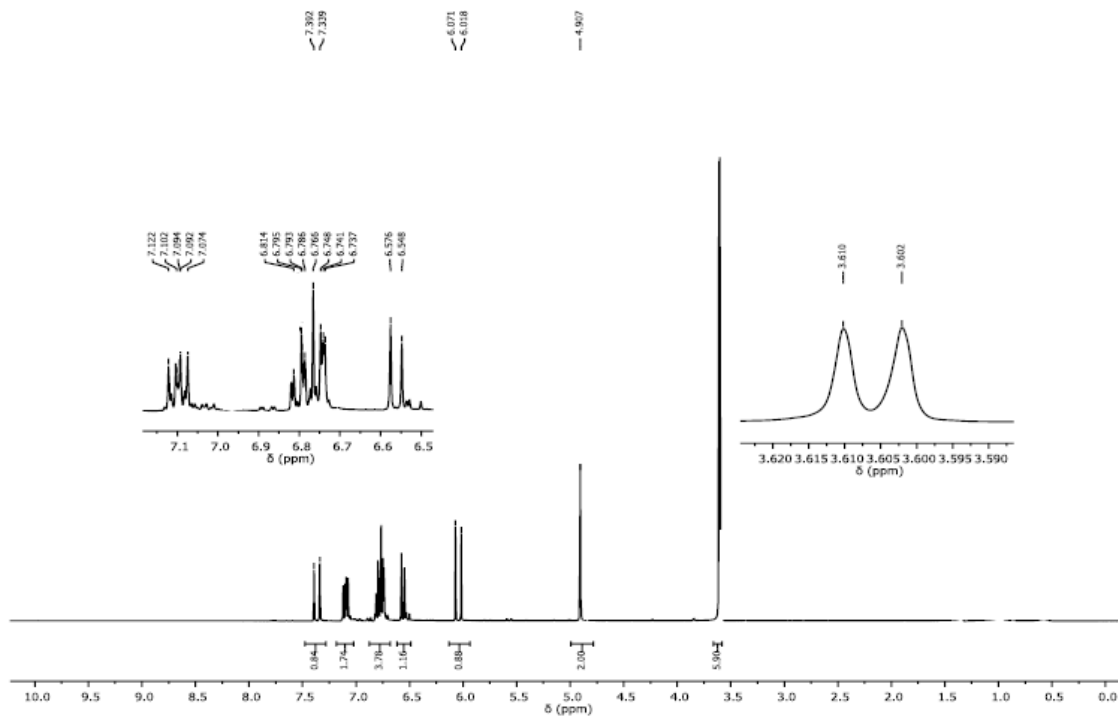

**Figure S55** – <sup>1</sup>H NMR spectrum (300 MHz, CDCl<sub>3</sub>) of **5h**.

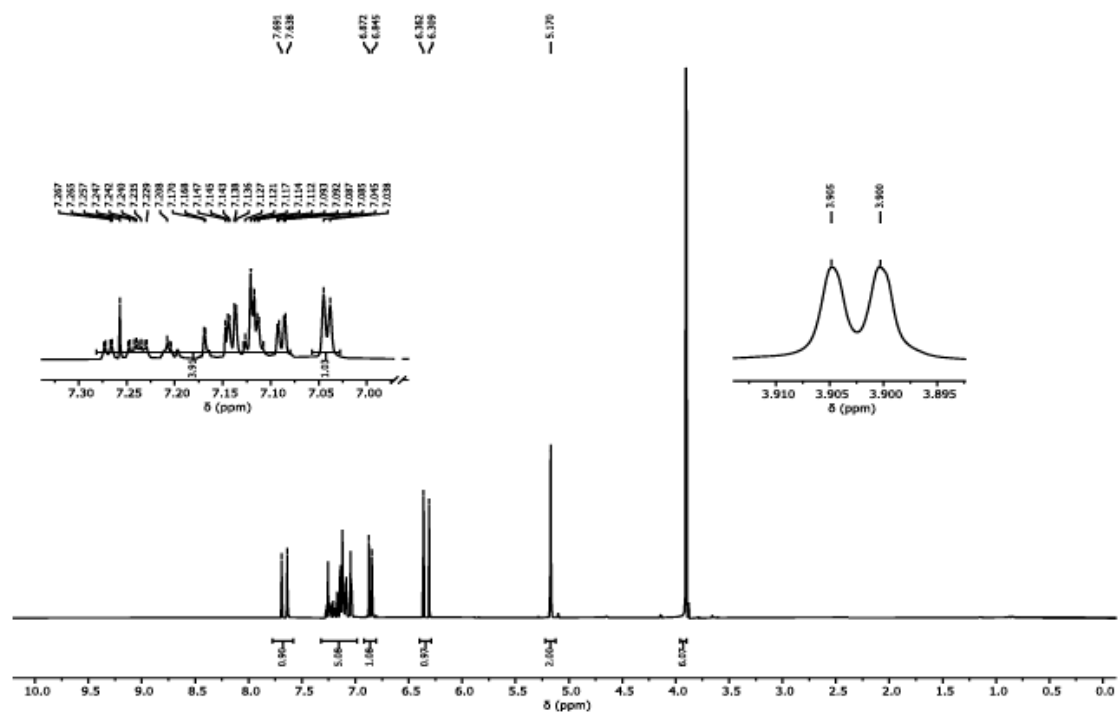

**Figure S57** – <sup>1</sup>H NMR spectrum (300 MHz, CDCl<sub>3</sub>) of **5i**.

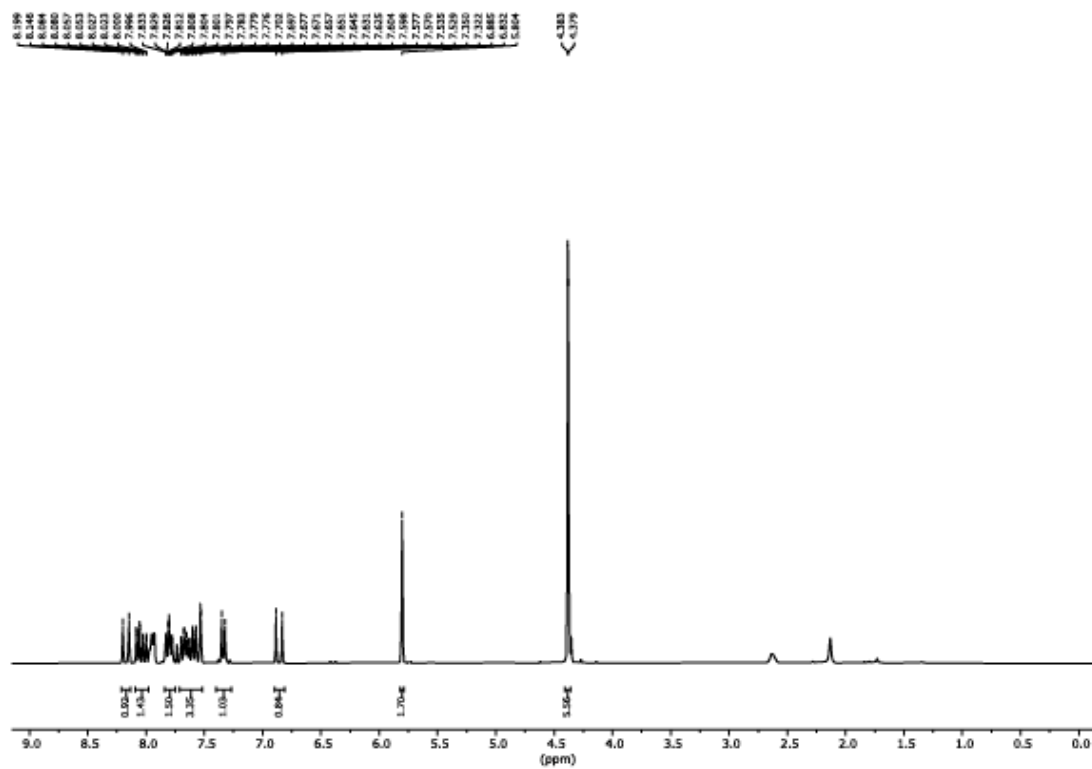

**Figure S58** – <sup>1</sup>H NMR spectrum (300 MHz, CDCl<sub>3</sub>) of **5j**.



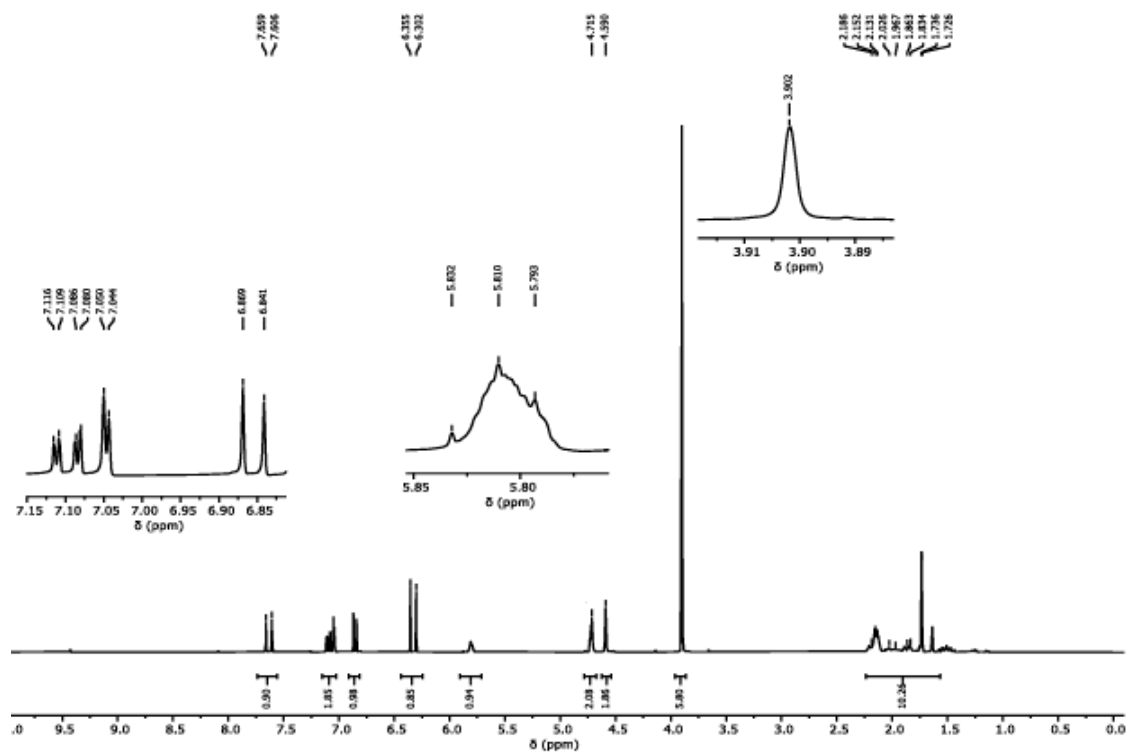

Figure S59 – <sup>1</sup>H NMR spectrum (300 MHz, CDCl<sub>3</sub>) of 5k.

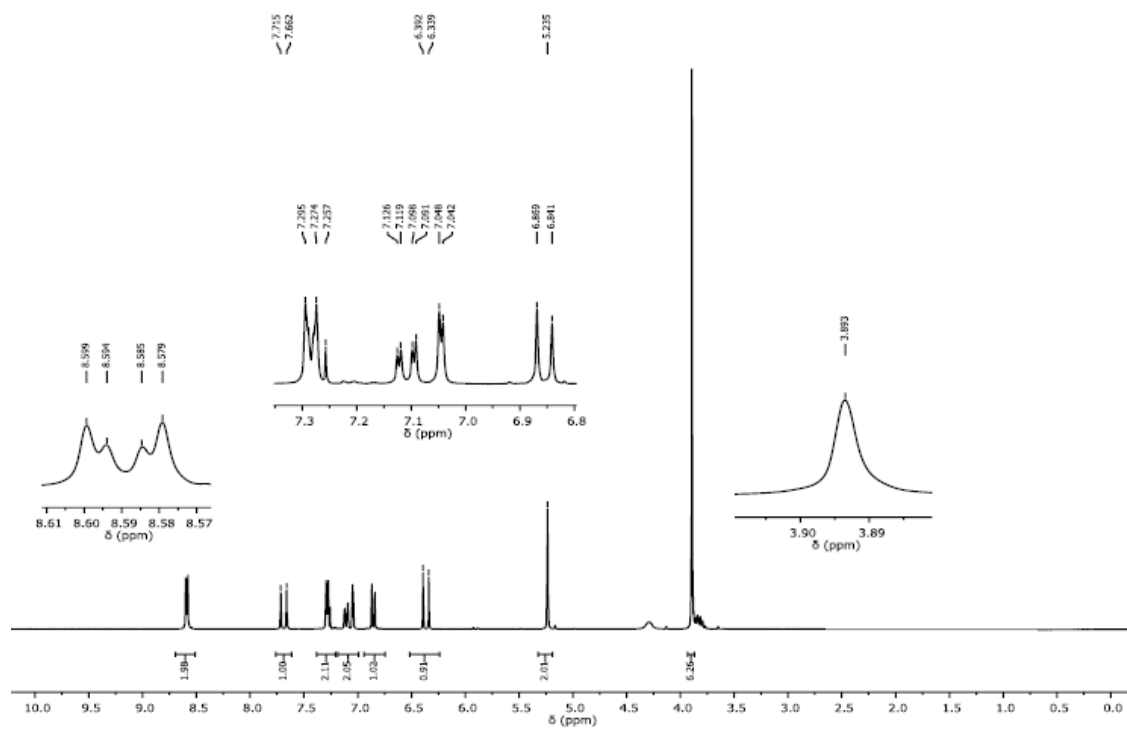

Figure S60 – <sup>1</sup>H NMR spectrum (300 MHz, CDCl<sub>3</sub>) of 5l.

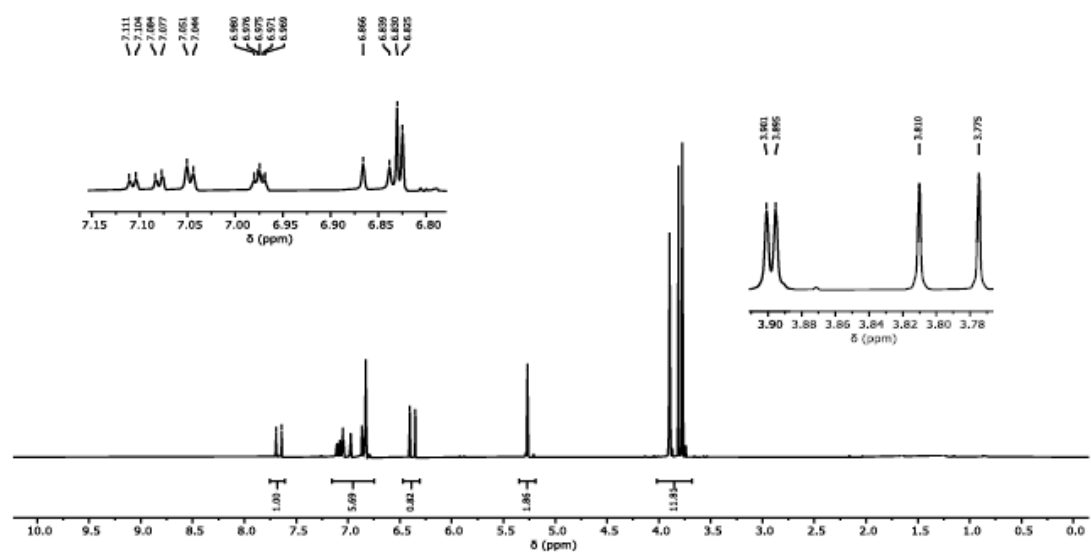

**Figure S61** –  $^1\text{H}$  NMR spectrum (300 MHz,  $\text{CDCl}_3$ ) of **5m**.

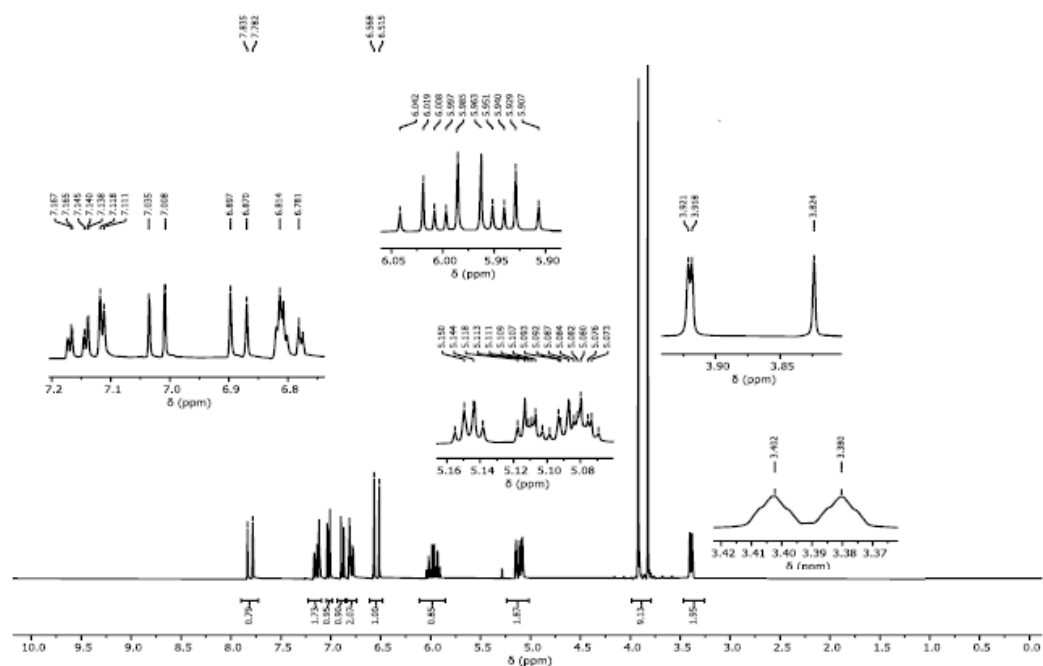

**Figure S62** –  $^1\text{H}$  NMR spectrum (300 MHz,  $\text{CDCl}_3$ ) of **5n**.

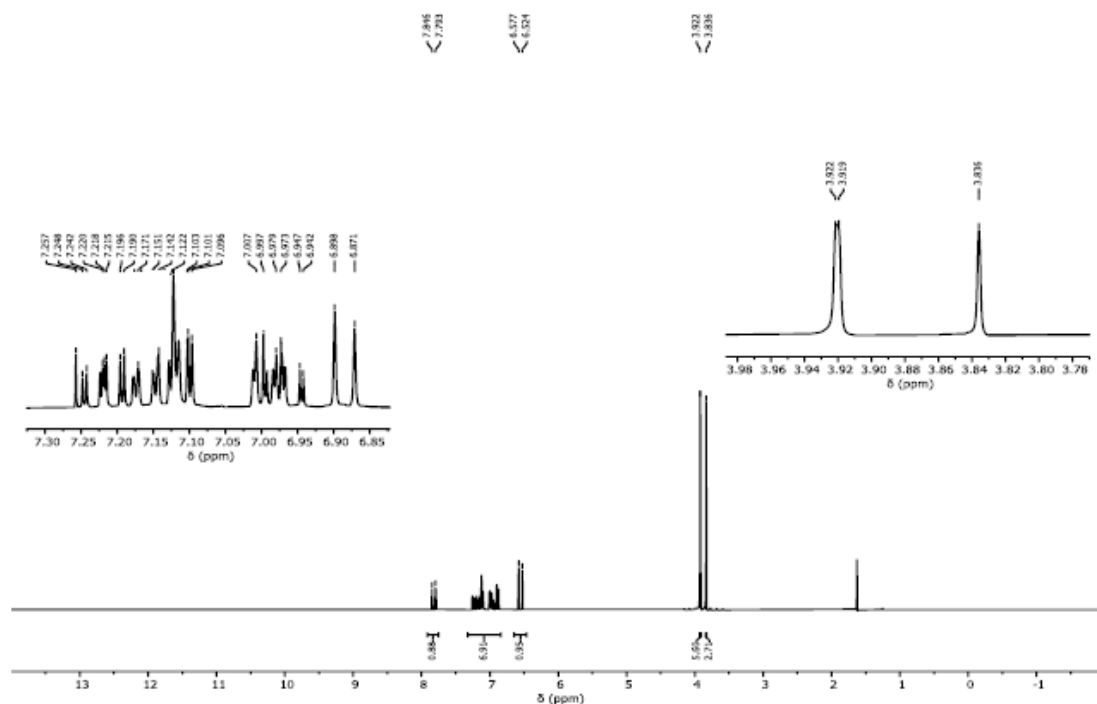

**Figure S63** – <sup>1</sup>H NMR spectrum (300 MHz, CDCl<sub>3</sub>) of **5o**.

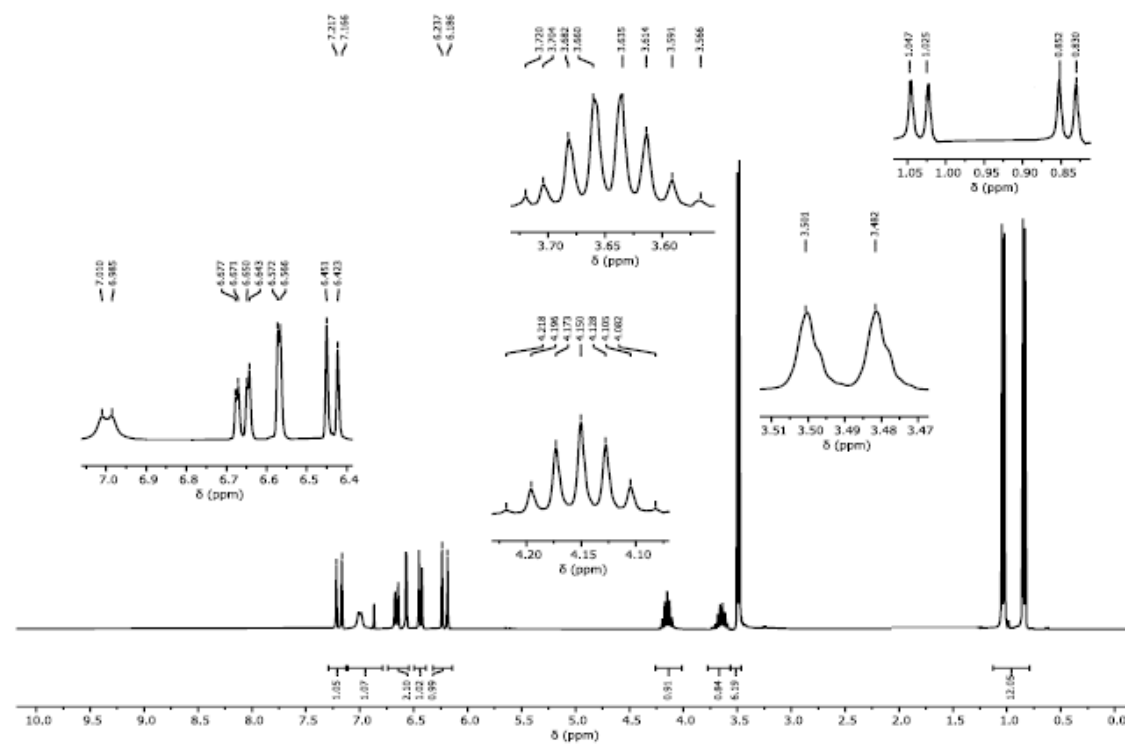

**Figure S64** – <sup>1</sup>H NMR spectrum (300 MHz, CDCl<sub>3</sub>) of **5p**.

**$^{13}\text{C}$  NUCLEAR MAGNETIC RESONANCE (NMR) SPECTRA  
OF COMPOUNDS 4a–4p AND 5a–5p**

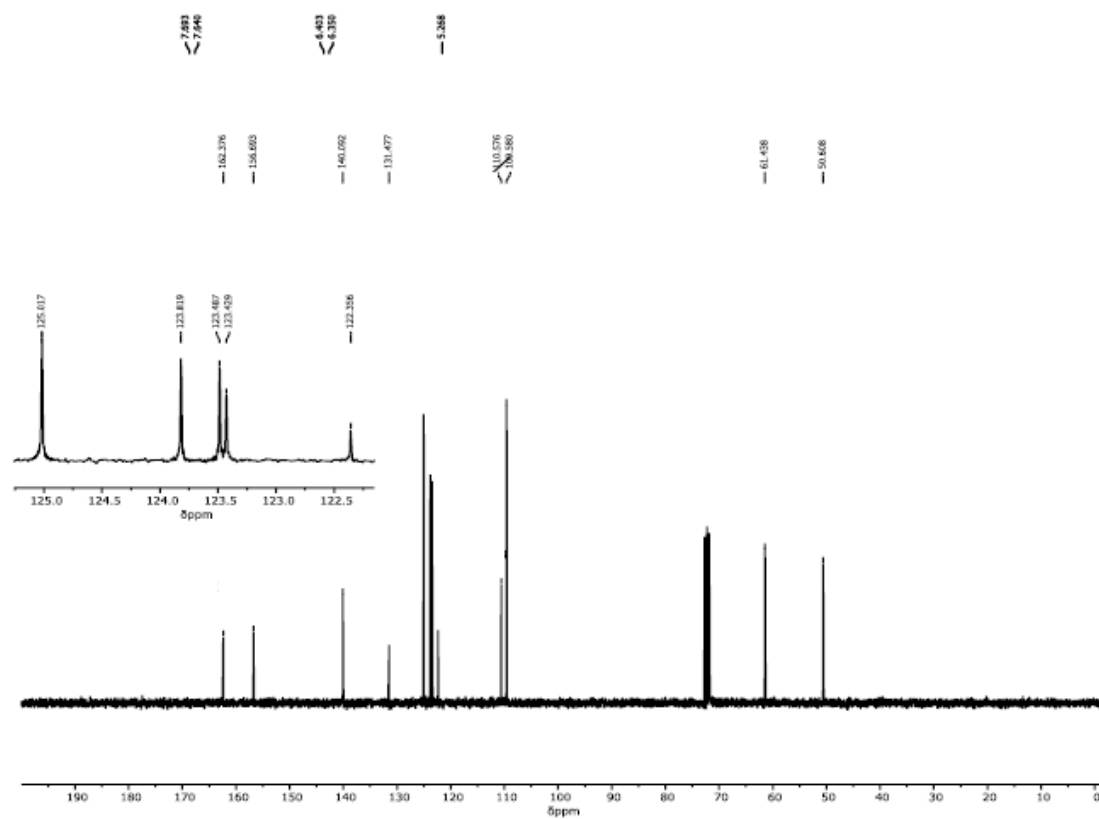

Figure S65 – <sup>13</sup>C NMR spectrum (75 MHz, CDCl<sub>3</sub>) of **4a**.

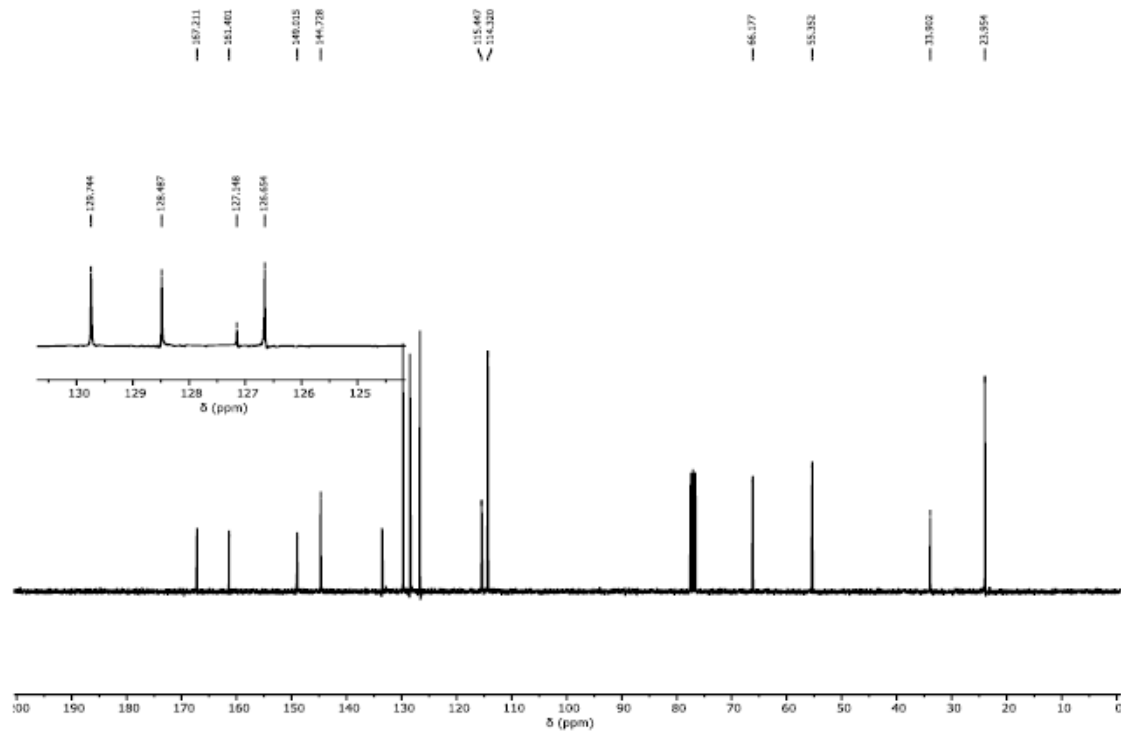

Figure S66 – <sup>13</sup>C NMR spectrum (75 MHz, CDCl<sub>3</sub>) of **4b**.

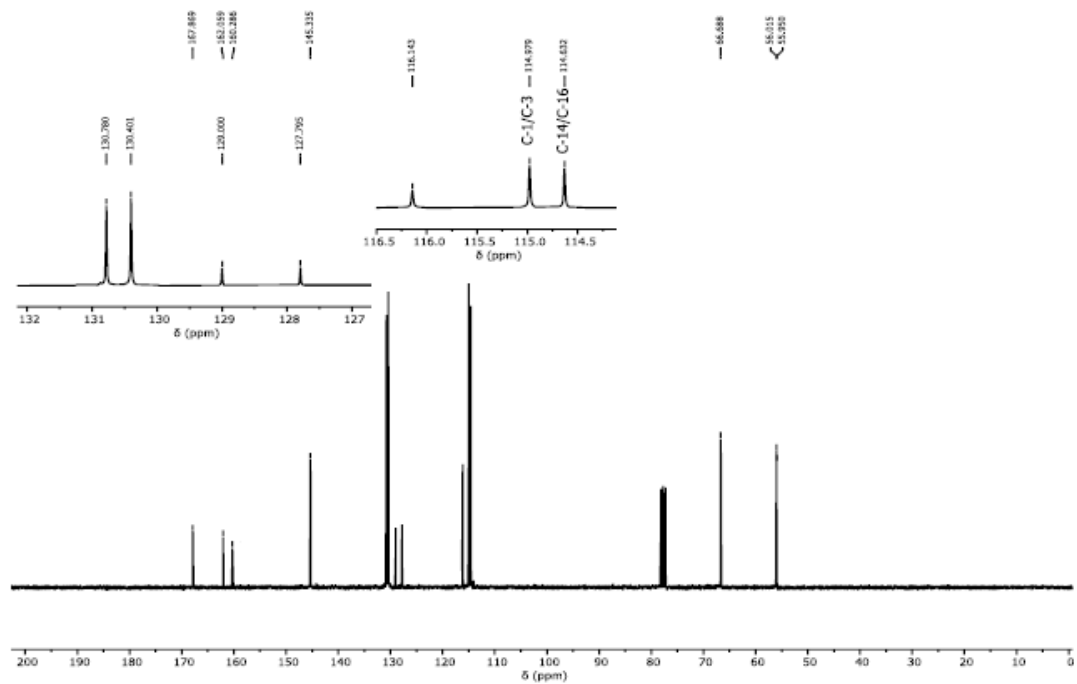

**Figure S67** –  $^{13}\text{C}$  NMR spectrum (75 MHz,  $\text{CDCl}_3$ ) of **4c**.

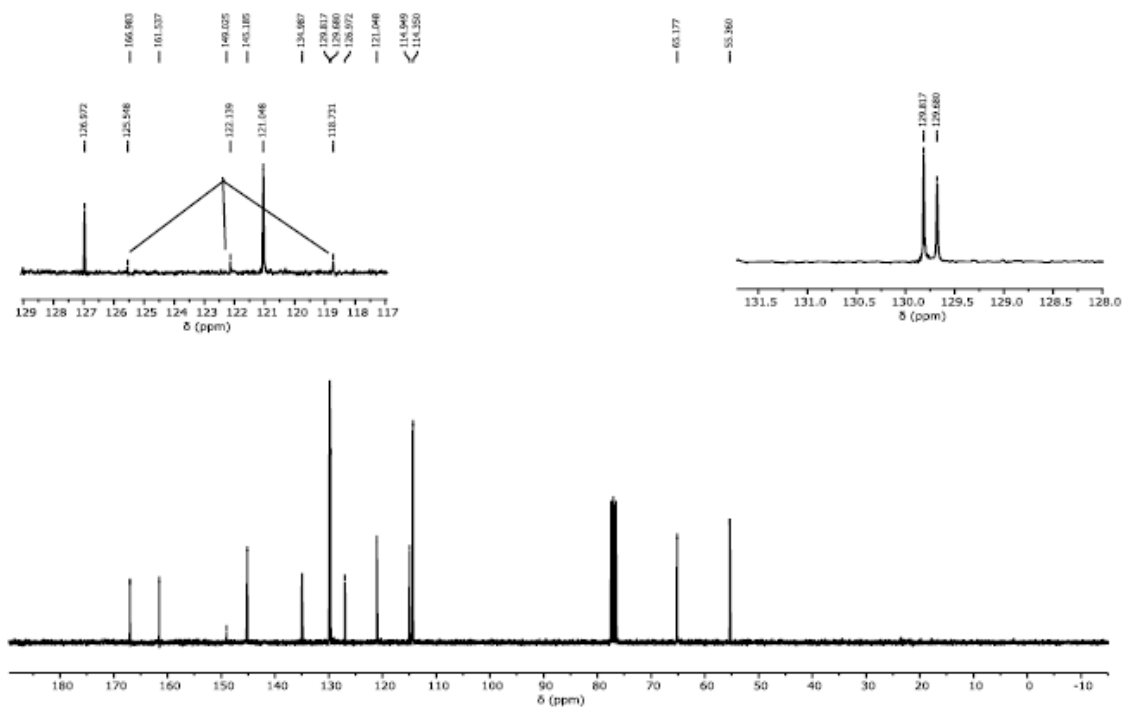

**Figure S68** –  $^{13}\text{C}$  NMR spectrum (75 MHz,  $\text{CDCl}_3$ ) of **4d**.

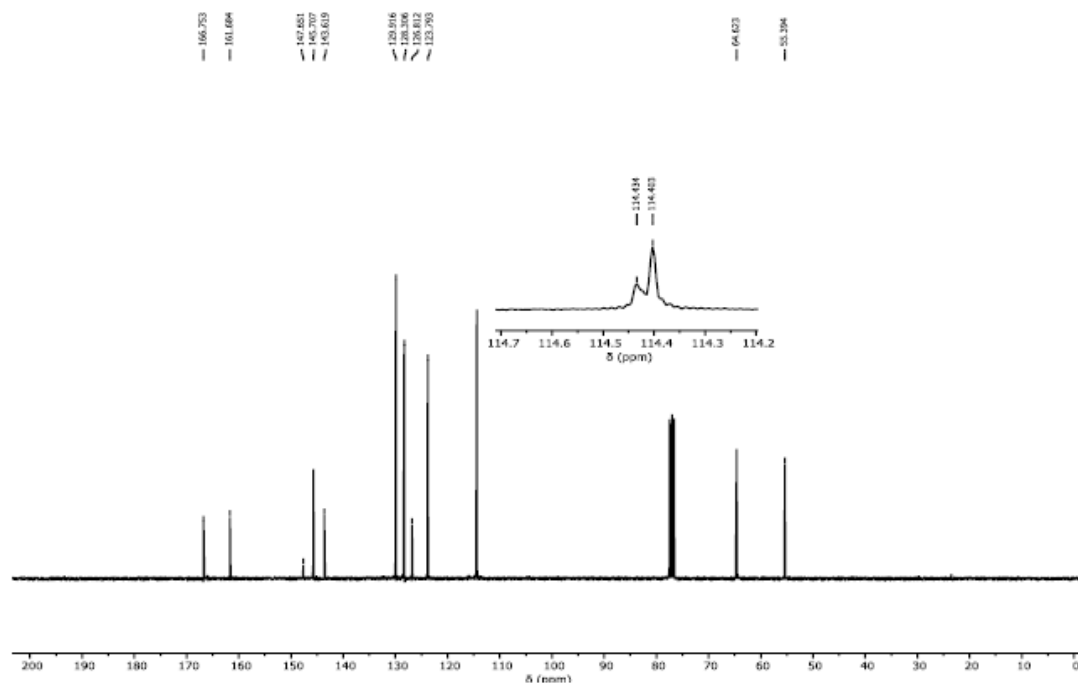

Figure S69 –  $^{13}\text{C}$  NMR spectrum (75 MHz,  $\text{CDCl}_3$ ) of **4e**.

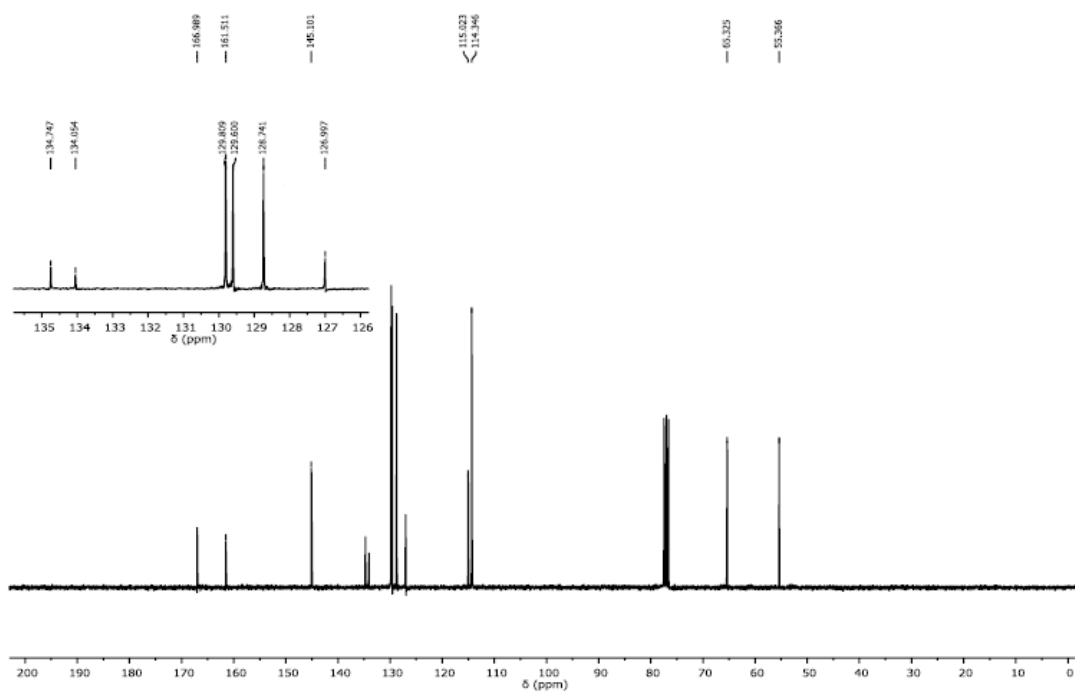

Figure S70 –  $^{13}\text{C}$  NMR spectrum (75 MHz,  $\text{CDCl}_3$ ) of **4f**.

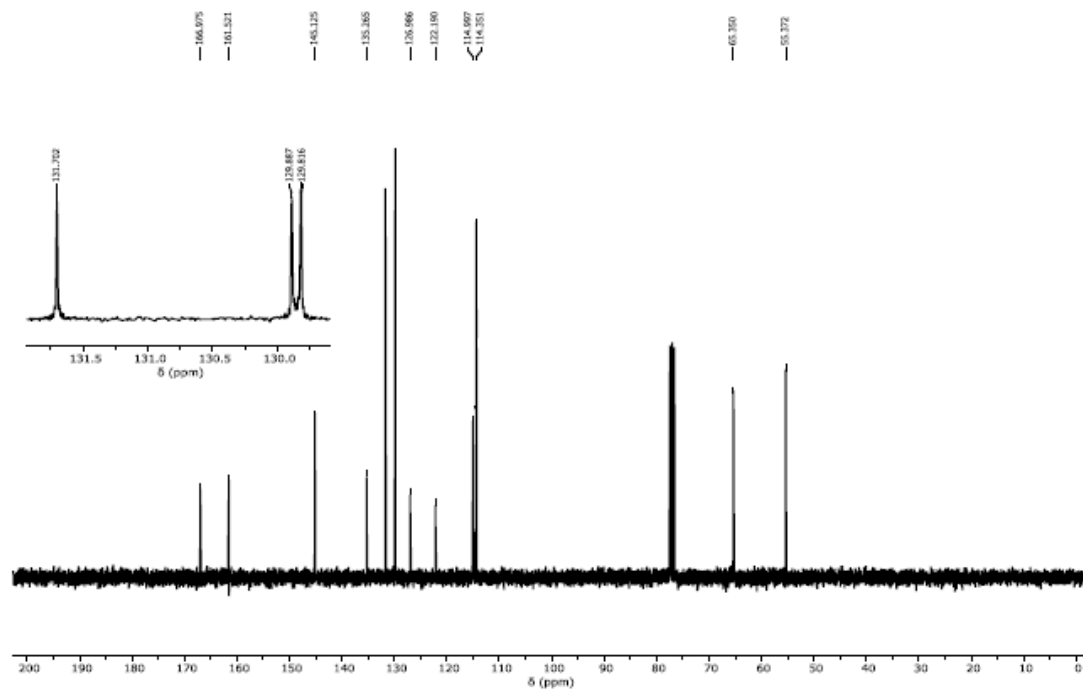

Figure S71 –  $^{13}\text{C}$  NMR spectrum (75 MHz,  $\text{CDCl}_3$ ) of **4g**.

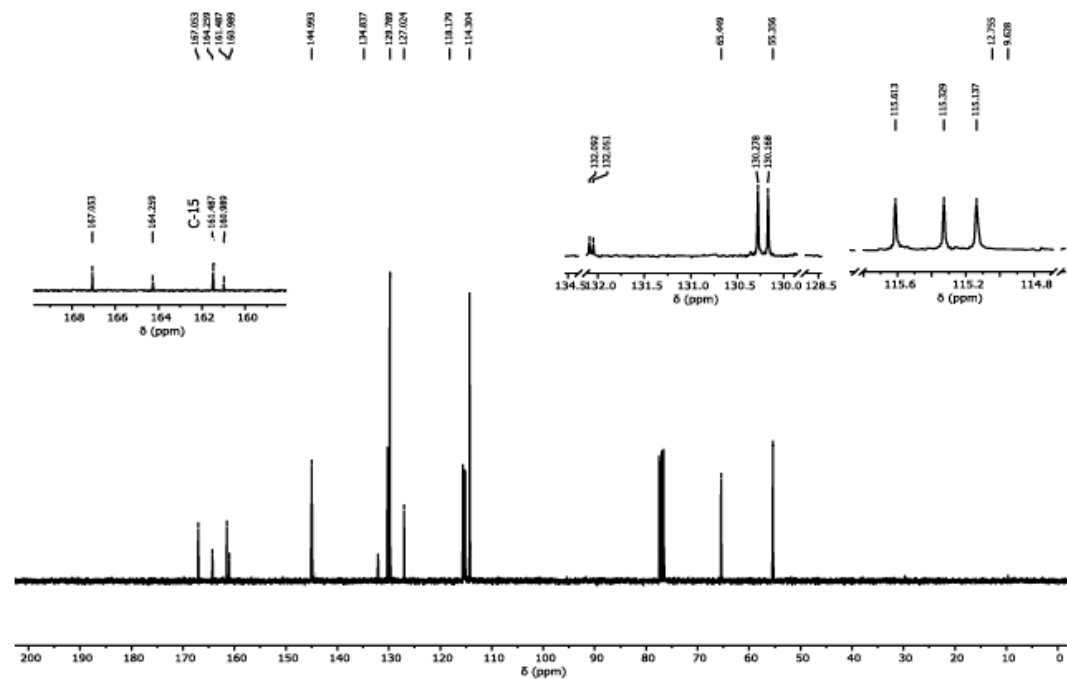

Figure S72 –  $^{13}\text{C}$  NMR spectrum (75 MHz,  $\text{CDCl}_3$ ) of **4h**.



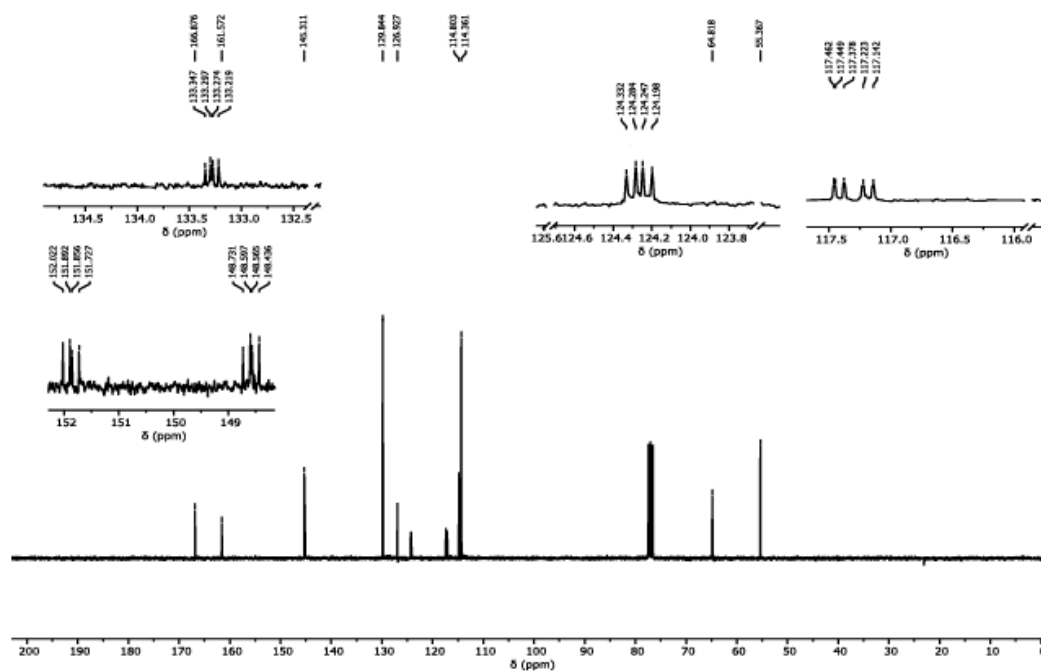

Figure S73 –  $^{13}\text{C}$  NMR spectrum (75 MHz,  $\text{CDCl}_3$ ) of **4i**.

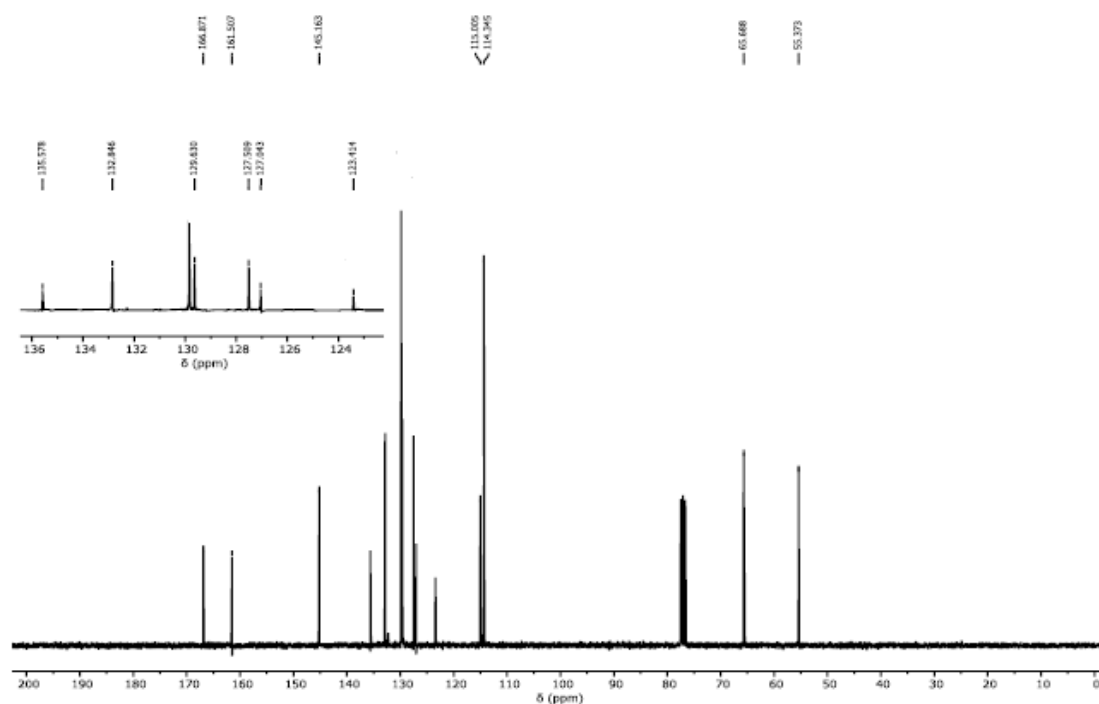

Figure S74 –  $^{13}\text{C}$  NMR spectrum (75 MHz,  $\text{CDCl}_3$ ) of **4j**.

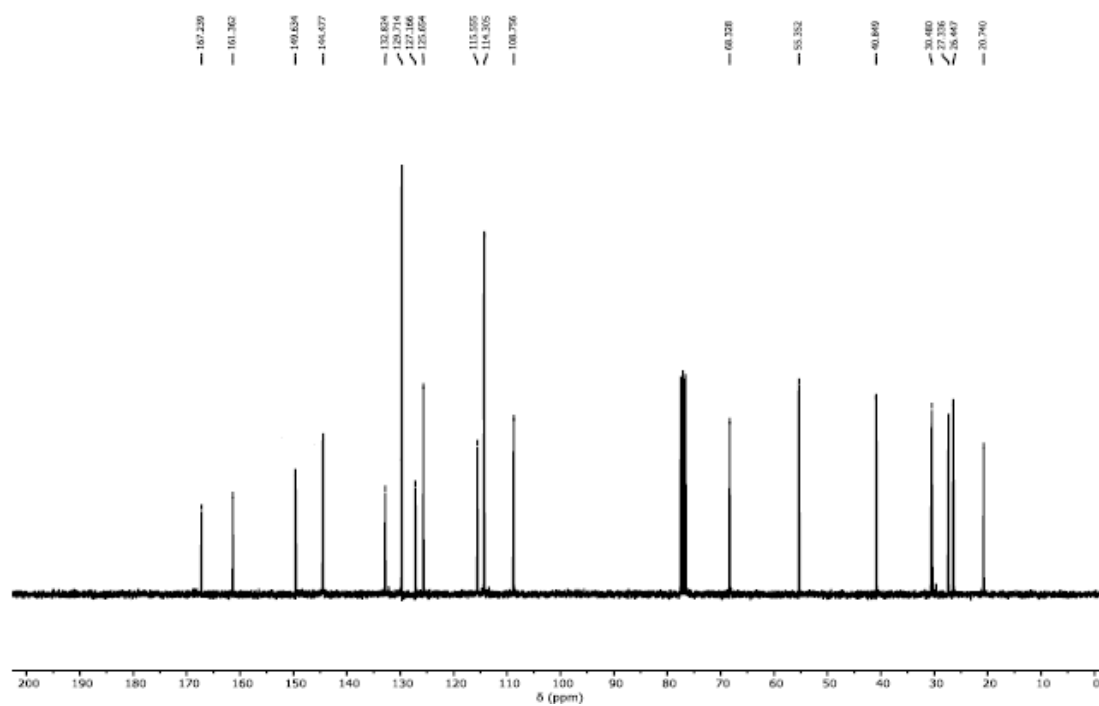

Figure S75 –  $^{13}\text{C}$  NMR spectrum (75 MHz,  $\text{CDCl}_3$ ) of **4k**.

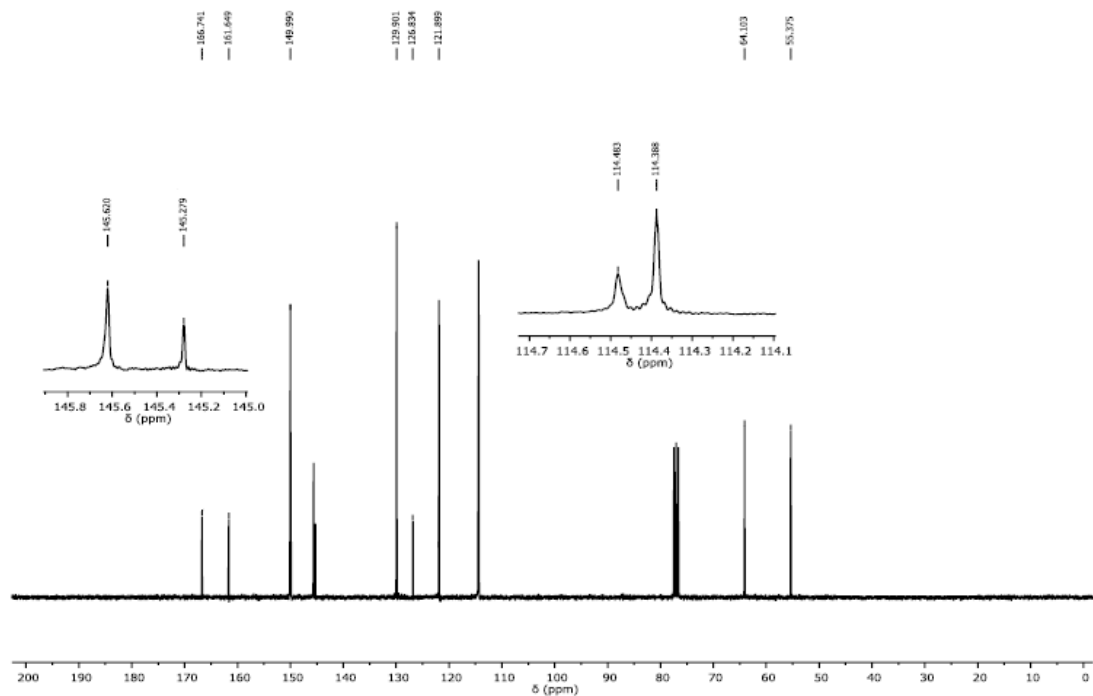

Figure S76 –  $^{13}\text{C}$  NMR spectrum (75 MHz,  $\text{CDCl}_3$ ) of **4l**.

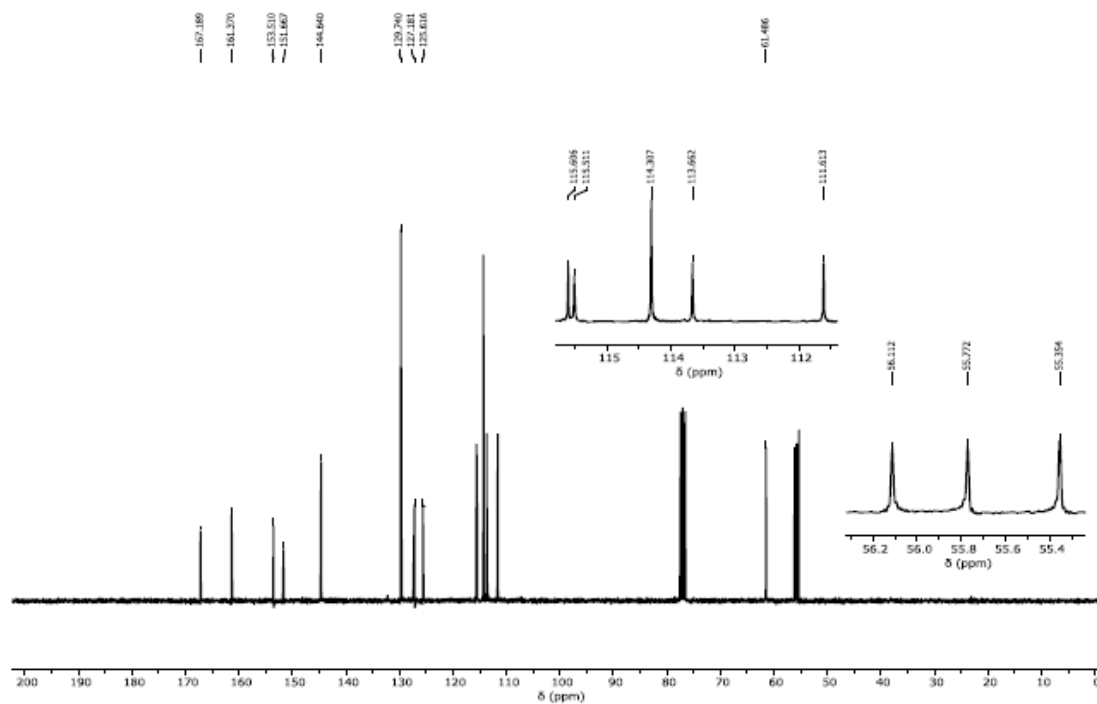

**Figure S77** – <sup>13</sup>C NMR spectrum (75 MHz, CDCl<sub>3</sub>) of **4m**.

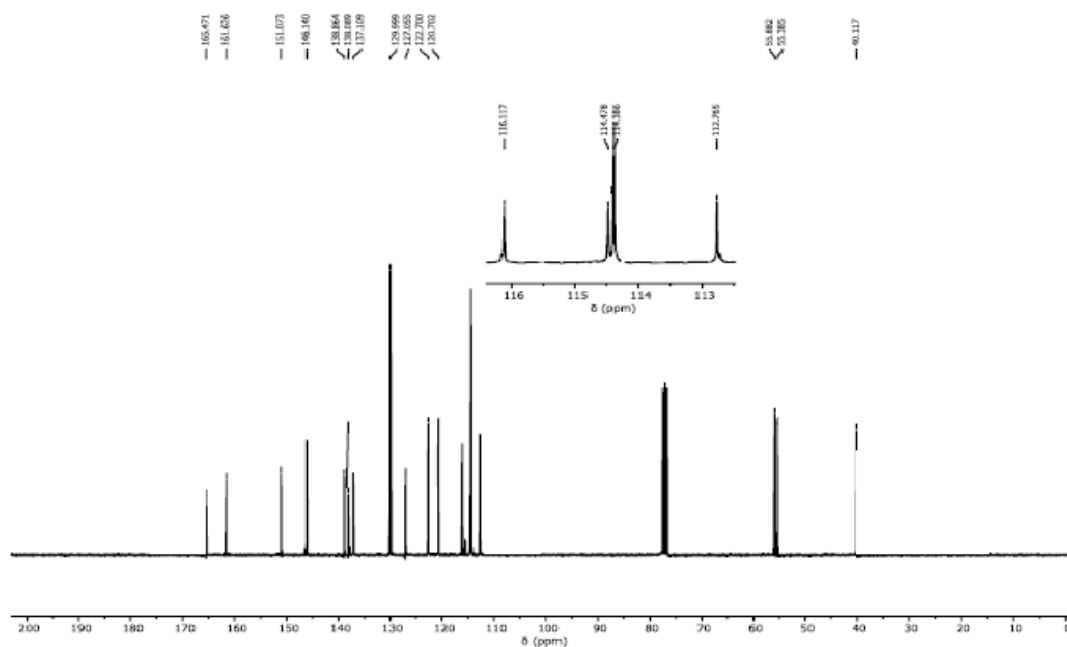

**Figure S78** – <sup>13</sup>C NMR spectrum (75 MHz, CDCl<sub>3</sub>) of **4n**.

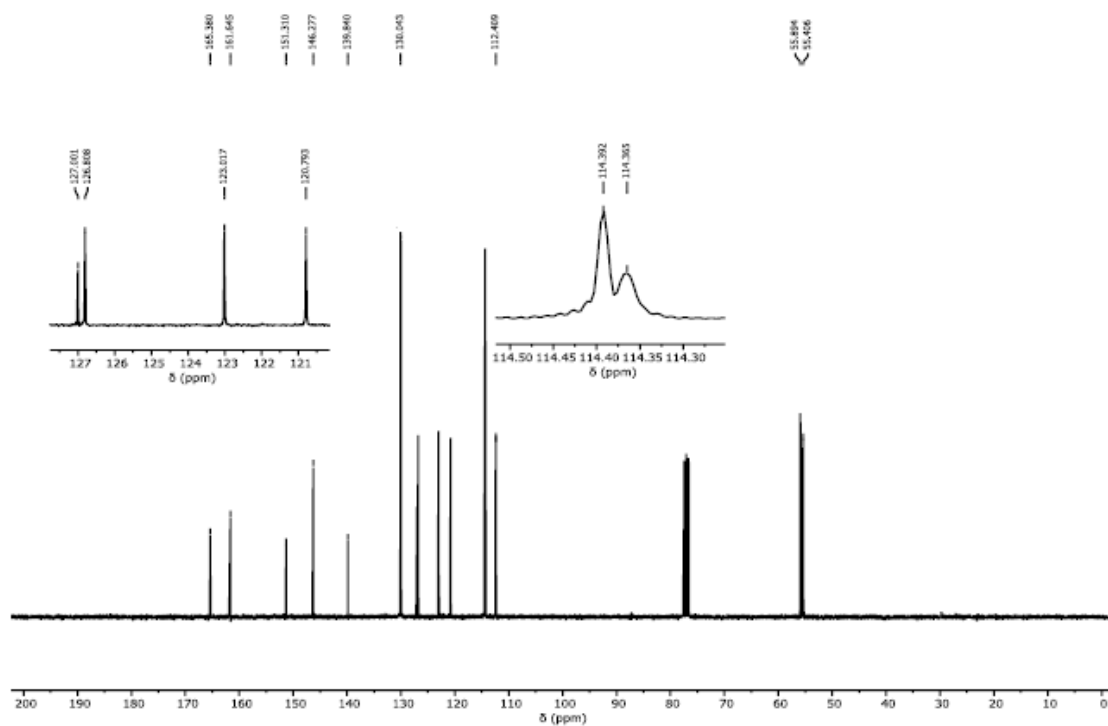

Figure S79 –  $^{13}\text{C}$  NMR spectrum (75 MHz,  $\text{CDCl}_3$ ) of **4o**.

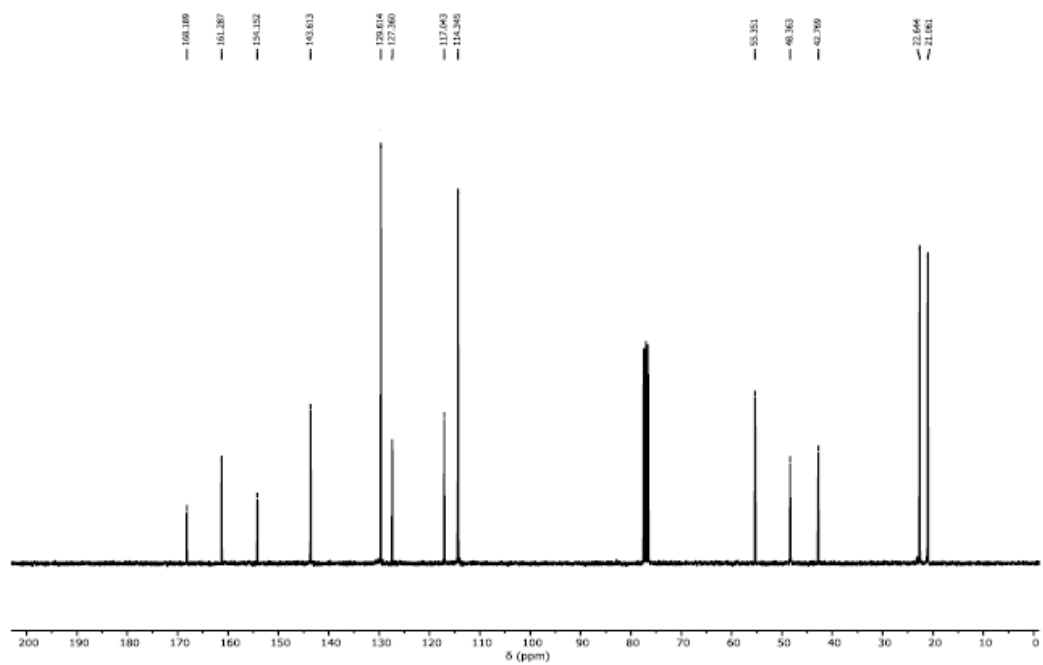

Figure S70 –  $^{13}\text{C}$  NMR spectrum (75 MHz,  $\text{CDCl}_3$ ) of **4p**.

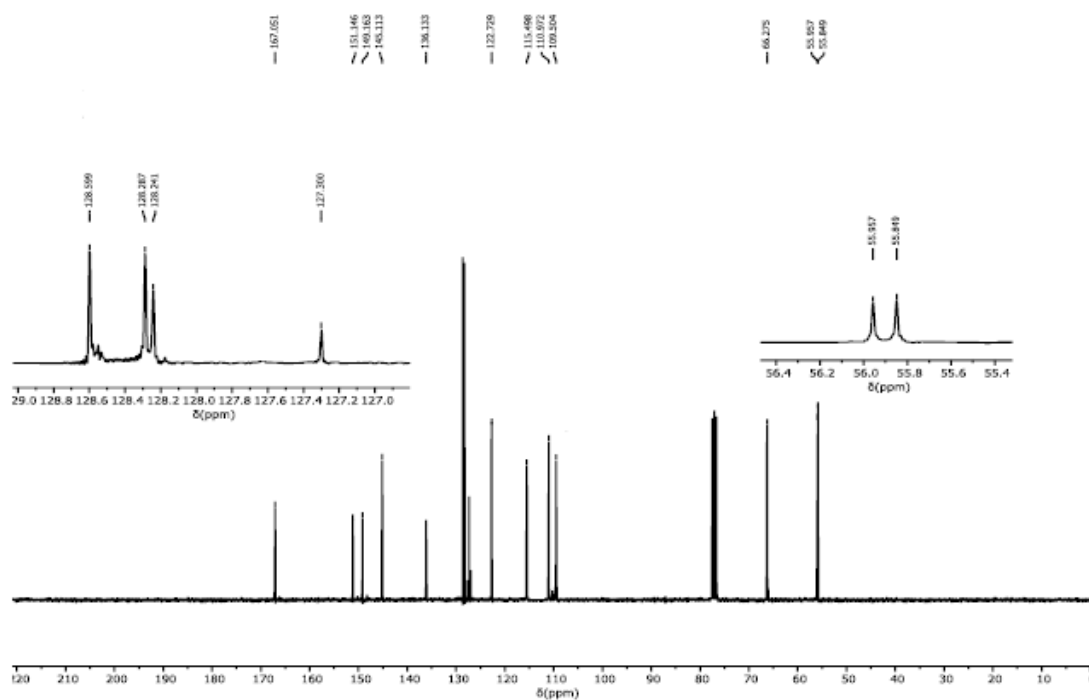

**Figure S71** –  $^{13}\text{C}$  NMR spectrum (75 MHz,  $\text{CDCl}_3$ ) of **5a**.

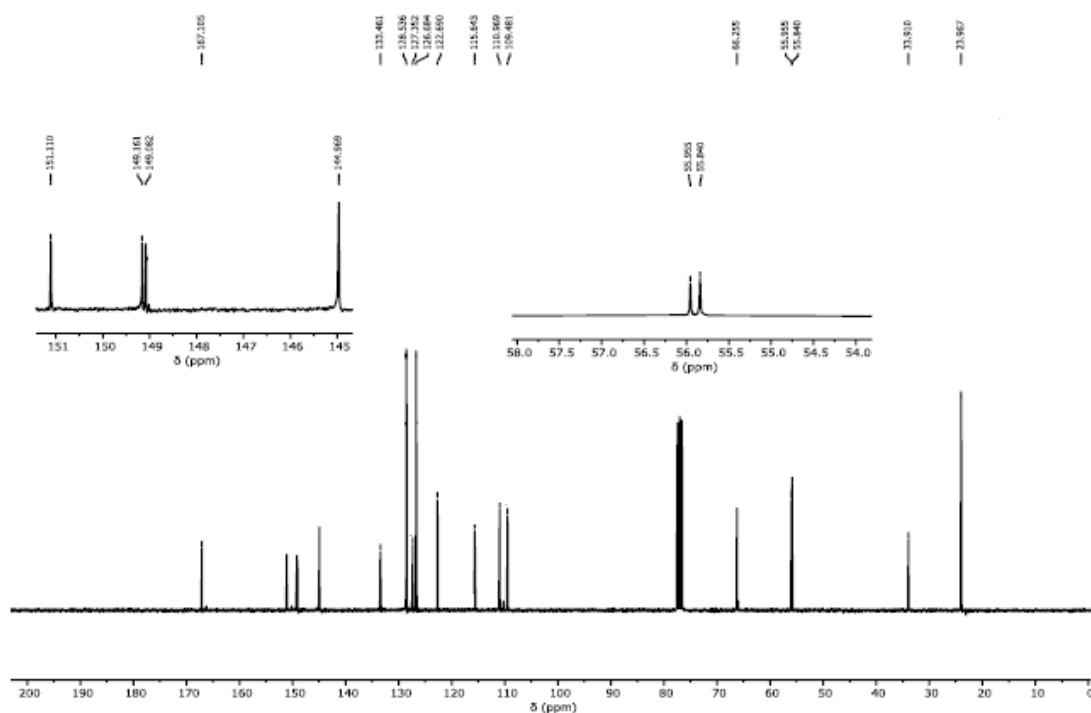

**Figure S72** –  $^{13}\text{C}$  NMR spectrum (75 MHz,  $\text{CDCl}_3$ ) of **5b**.

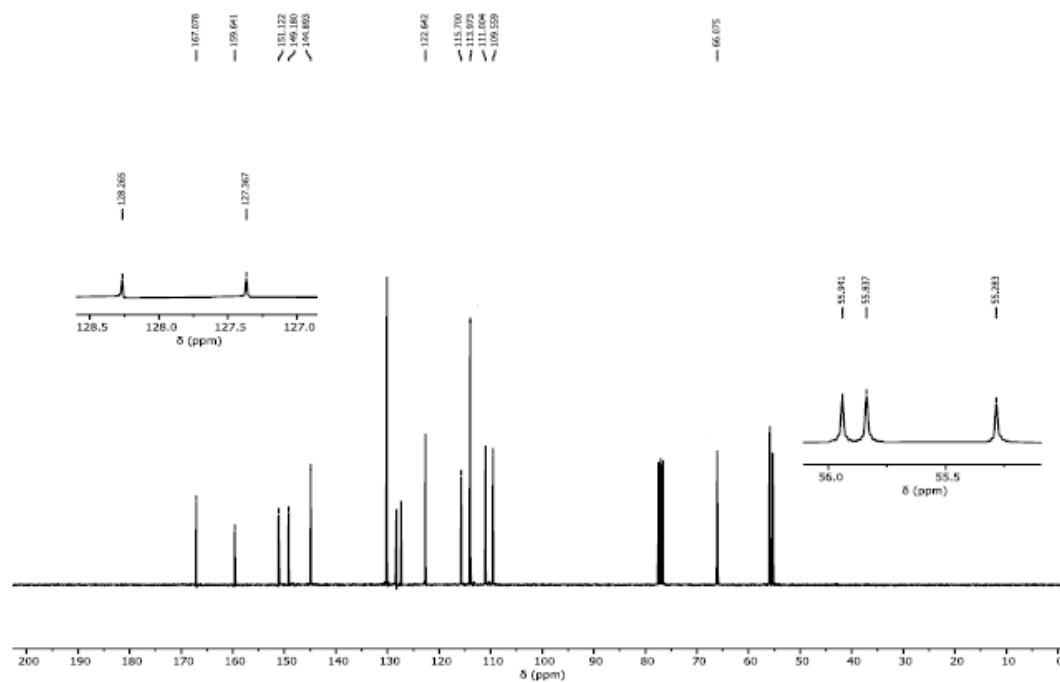

**Figure S73** –  $^{13}\text{C}$  NMR spectrum (75 MHz,  $\text{CDCl}_3$ ) of **5c**.

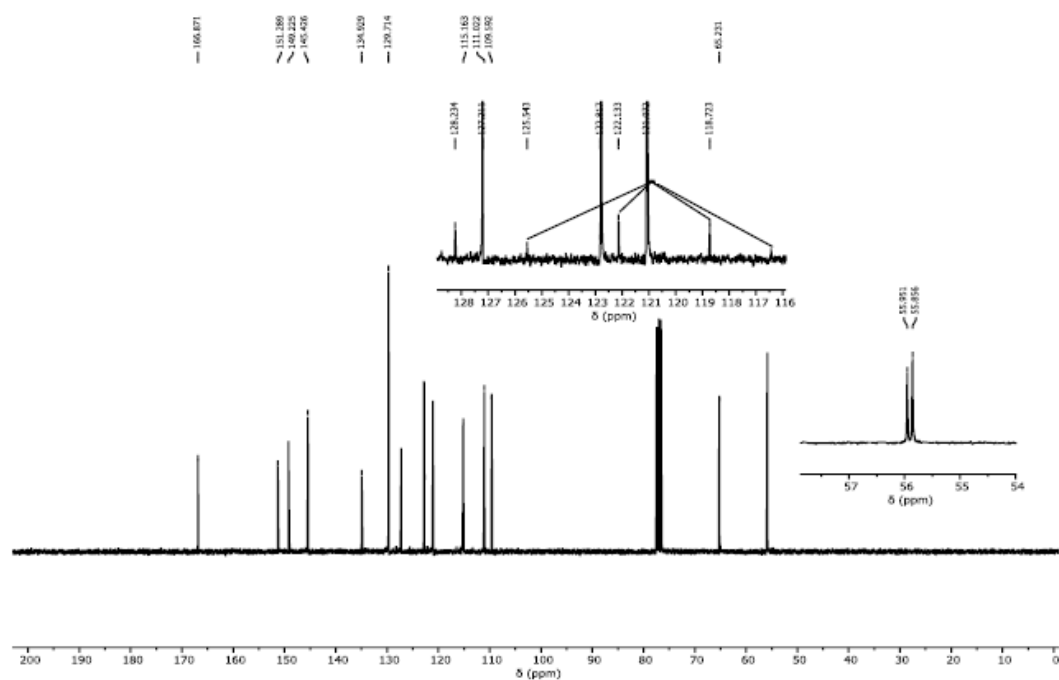

**Figure S74** –  $^{13}\text{C}$  NMR spectrum (75 MHz,  $\text{CDCl}_3$ ) of **5d**.

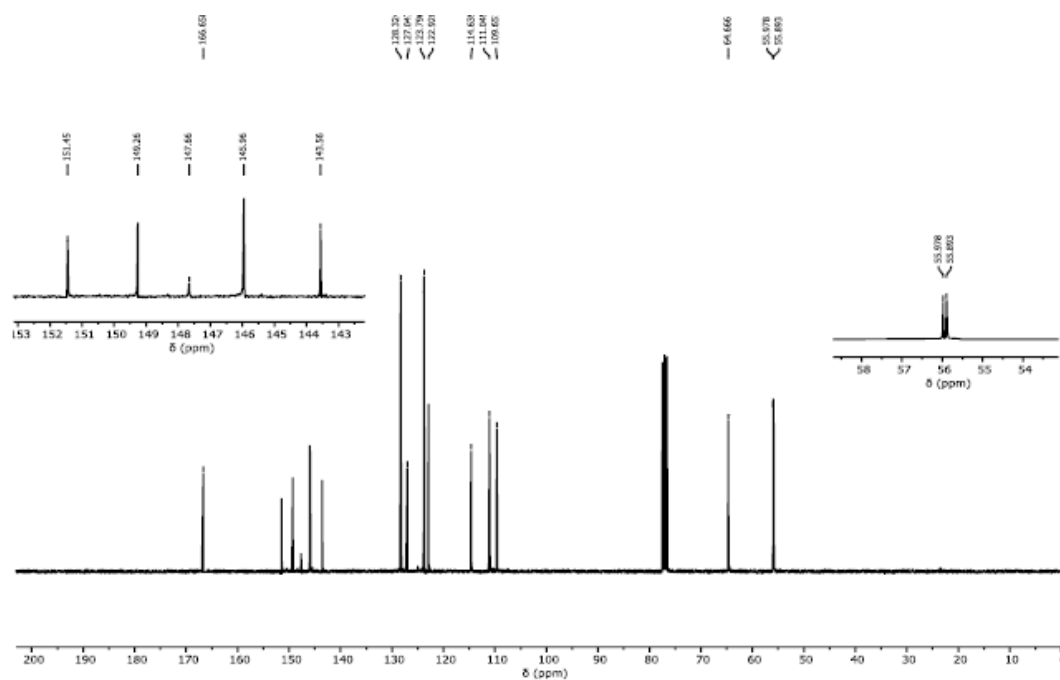

**Figure S75** –  $^{13}\text{C}$  NMR spectrum (75 MHz,  $\text{CDCl}_3$ ) of **5e**.

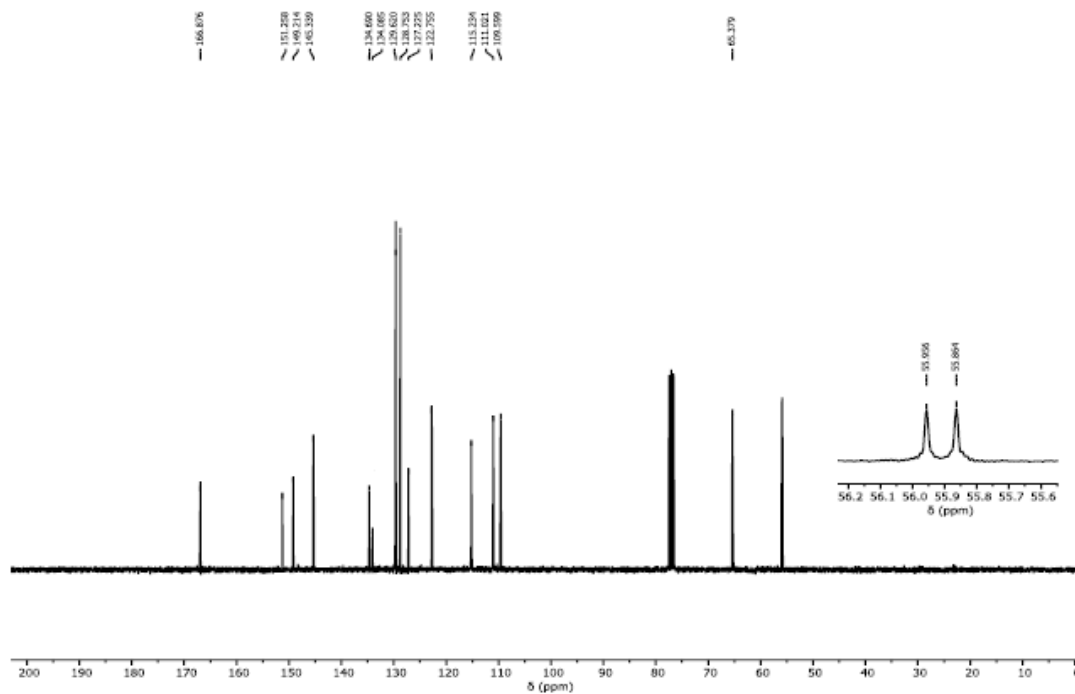

**Figure S76** –  $^{13}\text{C}$  NMR spectrum (75 MHz,  $\text{CDCl}_3$ ) of **5f**.

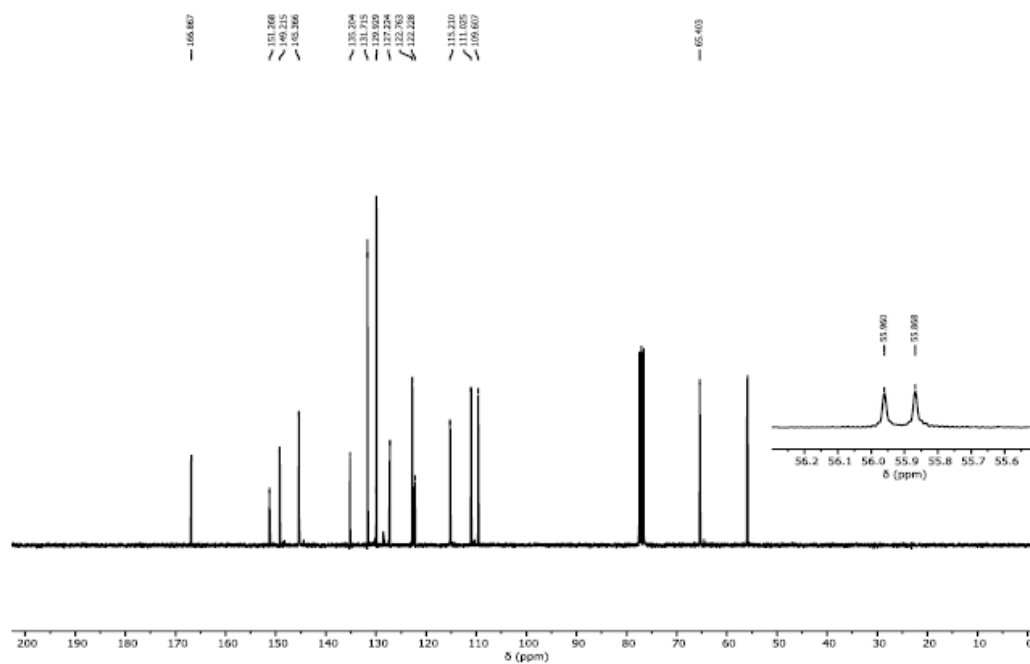

Figure S77 –  $^{13}\text{C}$  NMR spectrum (75 MHz,  $\text{CDCl}_3$ ) of **5g**.

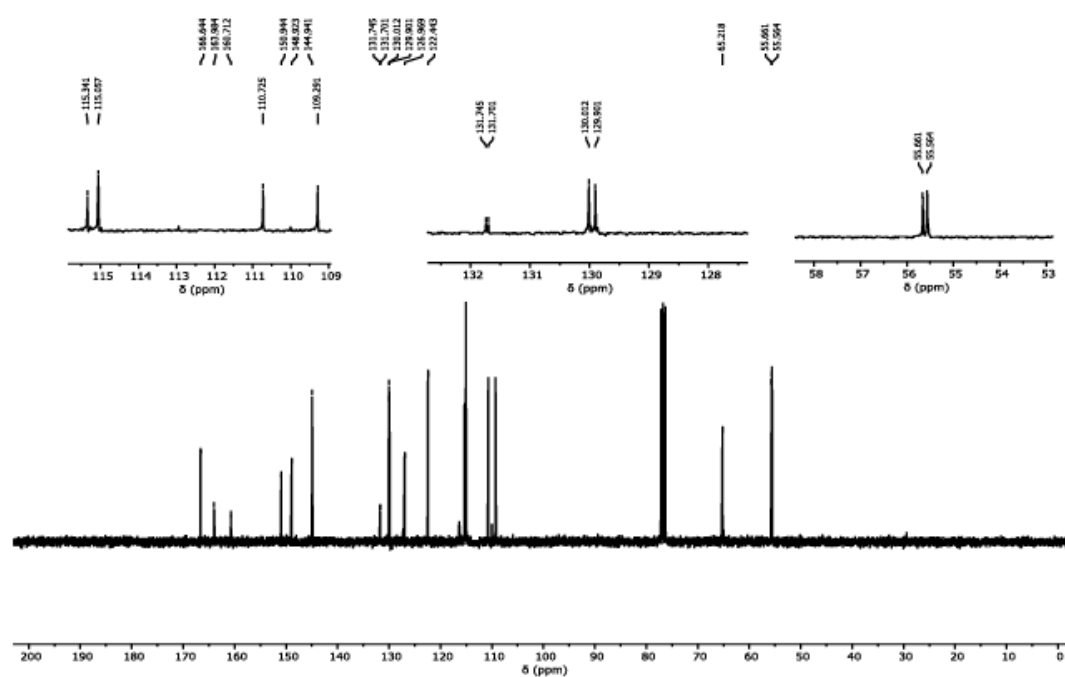

Figure S78 –  $^{13}\text{C}$  NMR spectrum (75 MHz,  $\text{CDCl}_3$ ) of **5h**.



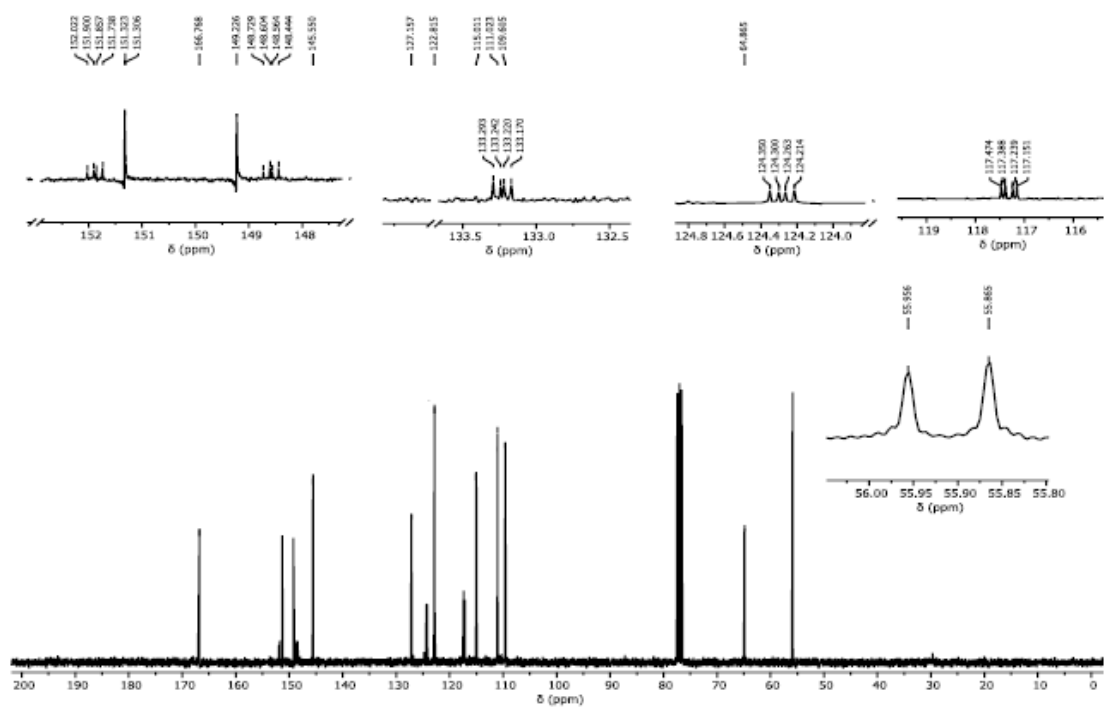

Figure S79 –  $^{13}\text{C}$  NMR spectrum (75 MHz,  $\text{CDCl}_3$ ) of **5i**.

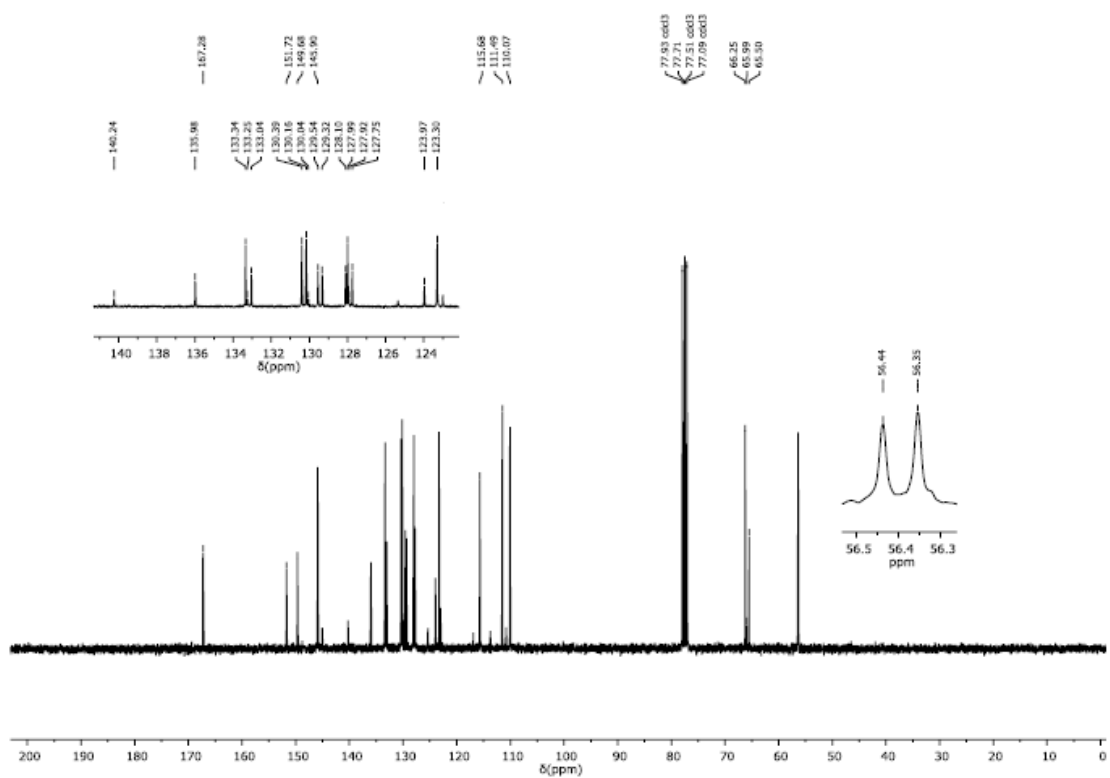

Figure S80 –  $^{13}\text{C}$  NMR spectrum (75 MHz,  $\text{CDCl}_3$ ) of **5j**.

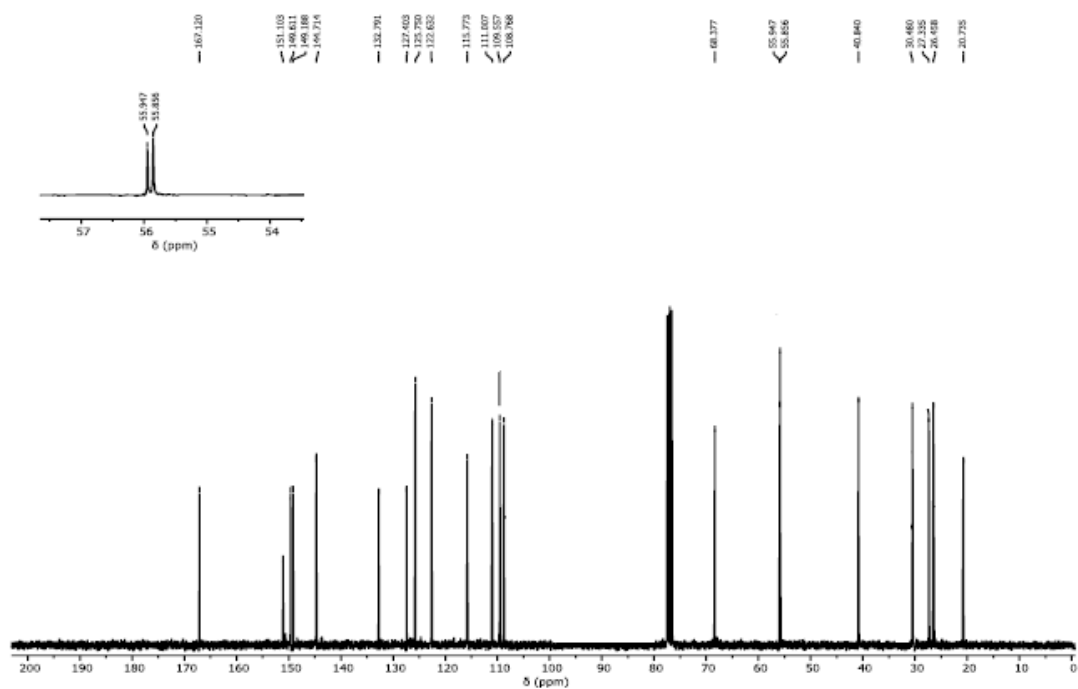

Figure S81 –  $^{13}\text{C}$  NMR spectrum (75 MHz,  $\text{CDCl}_3$ ) of **5k**.

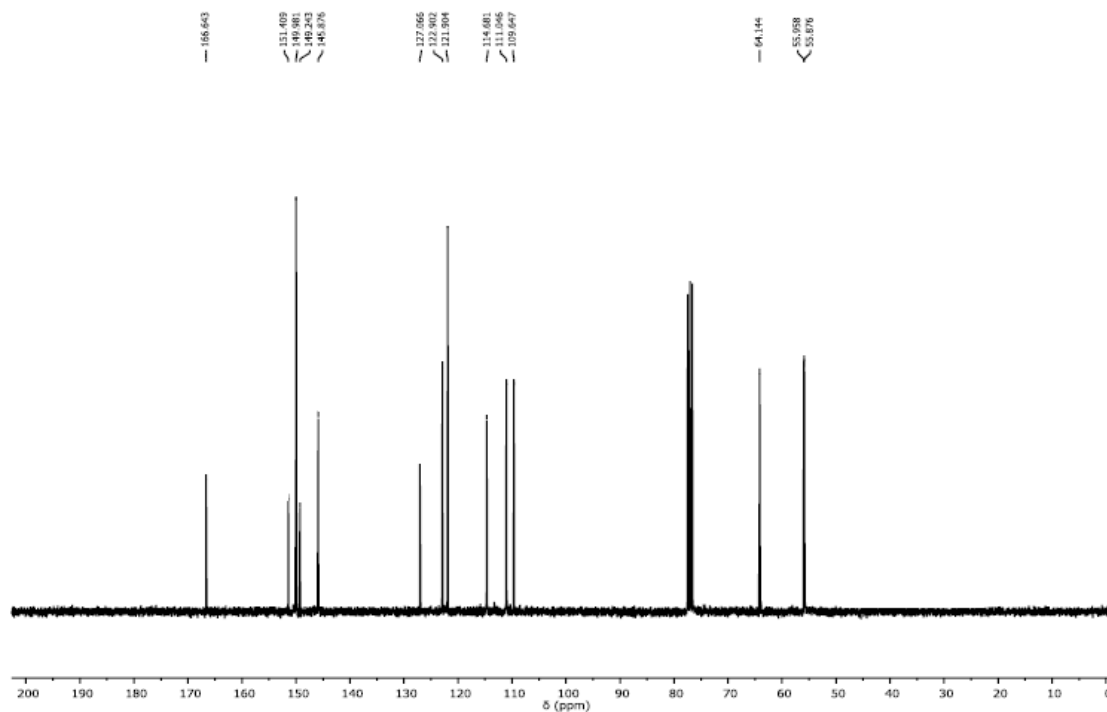

Figure S82 –  $^{13}\text{C}$  NMR spectrum (75 MHz,  $\text{CDCl}_3$ ) of **5l**.

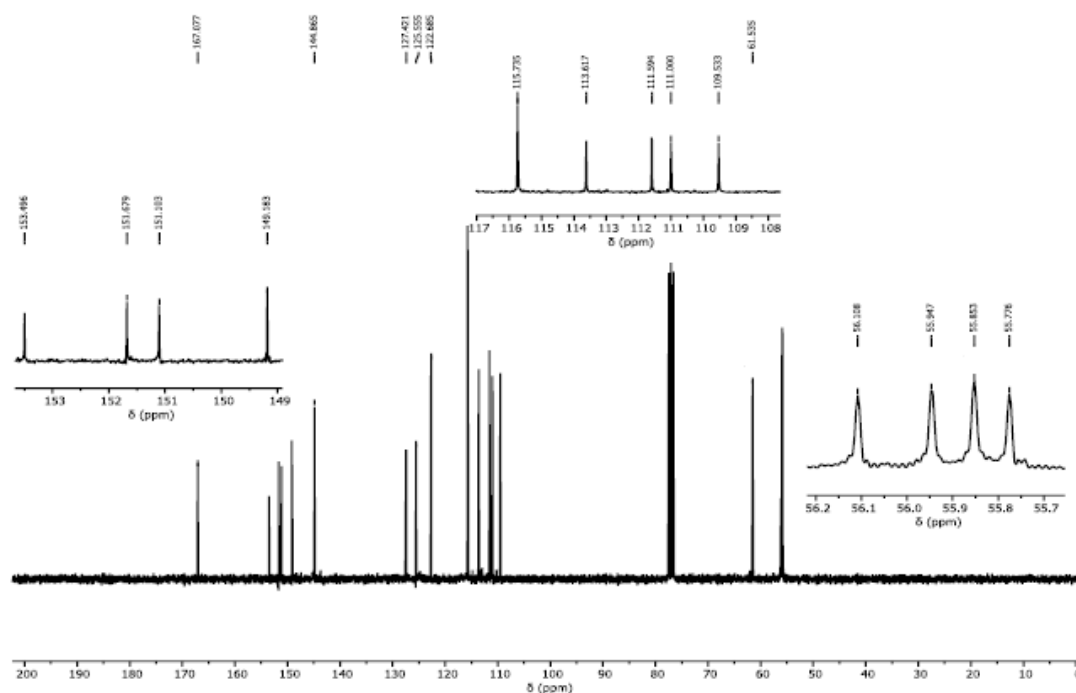

Figure S83 –  $^{13}\text{C}$  NMR spectrum (75 MHz,  $\text{CDCl}_3$ ) of **5m**.

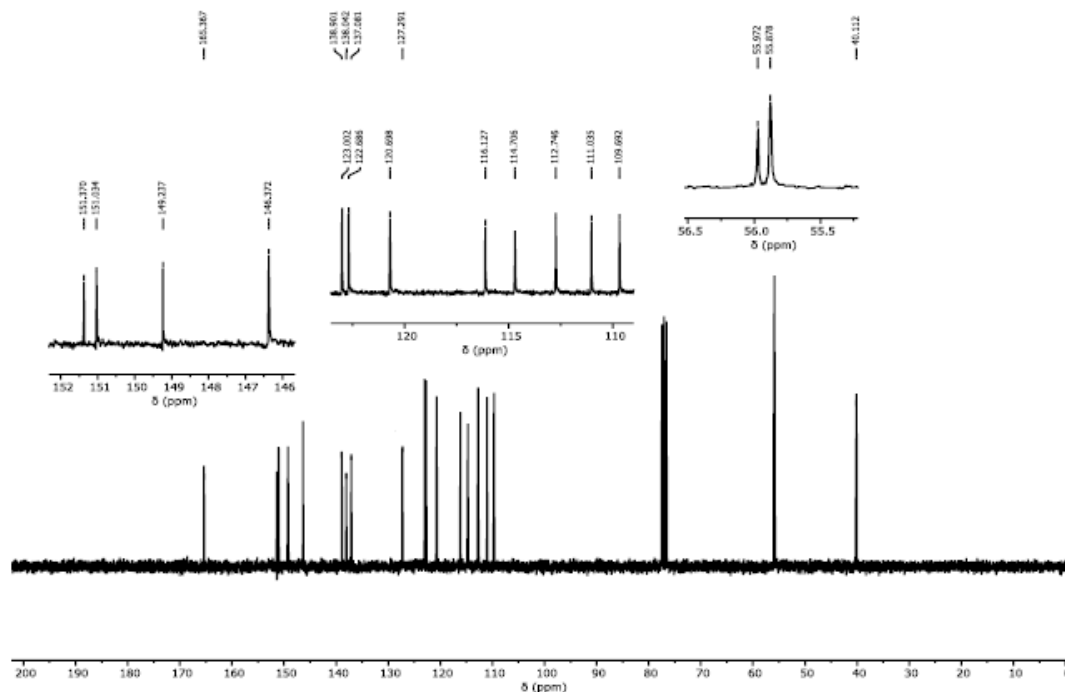

Figure S84 –  $^{13}\text{C}$  NMR spectrum (75 MHz,  $\text{CDCl}_3$ ) of **5n**.

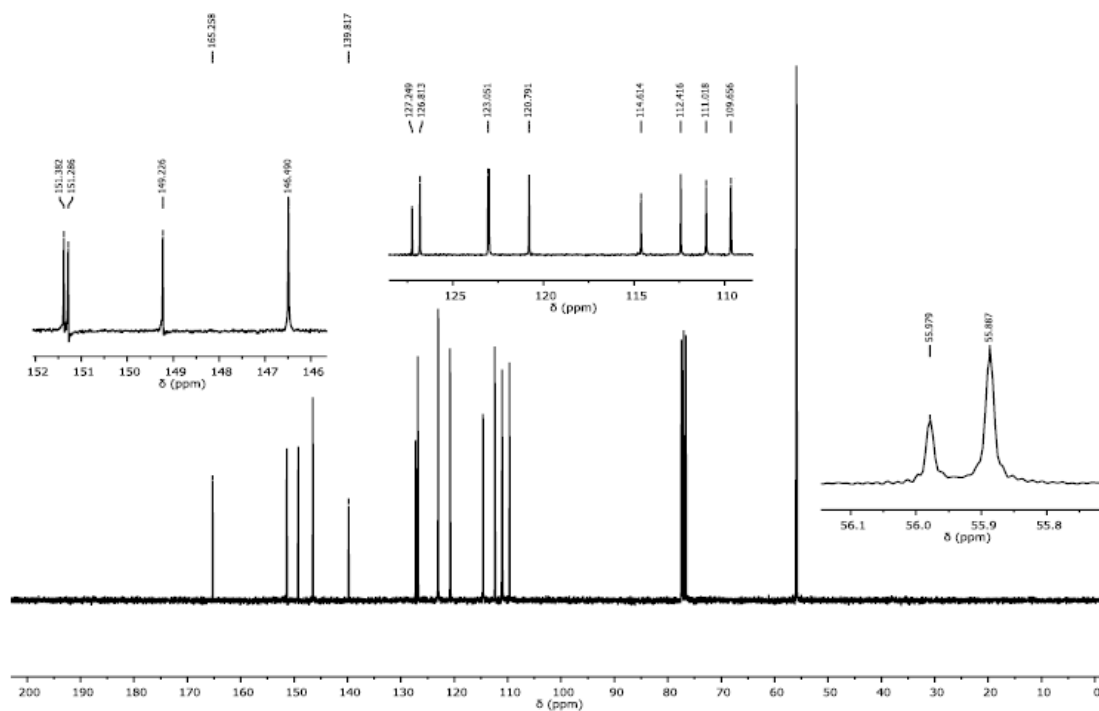

**Figure S85** –  $^{13}\text{C}$  NMR spectrum (75 MHz,  $\text{CDCl}_3$ ) of **5o**.

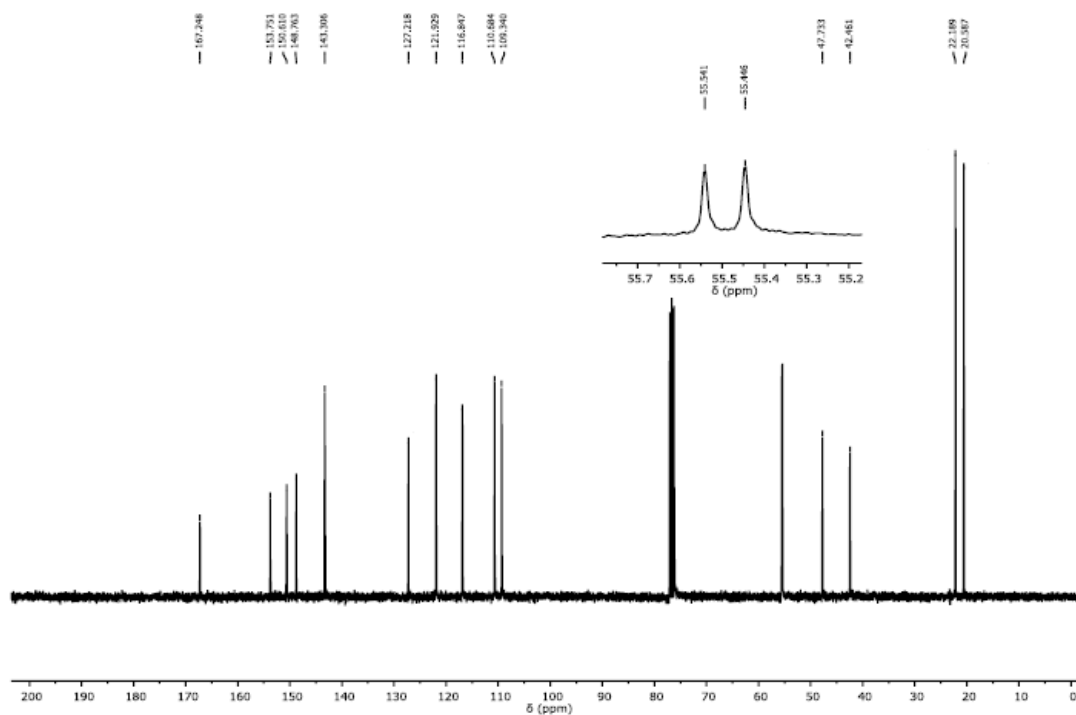

**Figure S86** –  $^{13}\text{C}$  NMR spectrum (75 MHz,  $\text{CDCl}_3$ ) of **5p**.

## **MASS SPECTRA OF SELECTED COMPOUNDS**

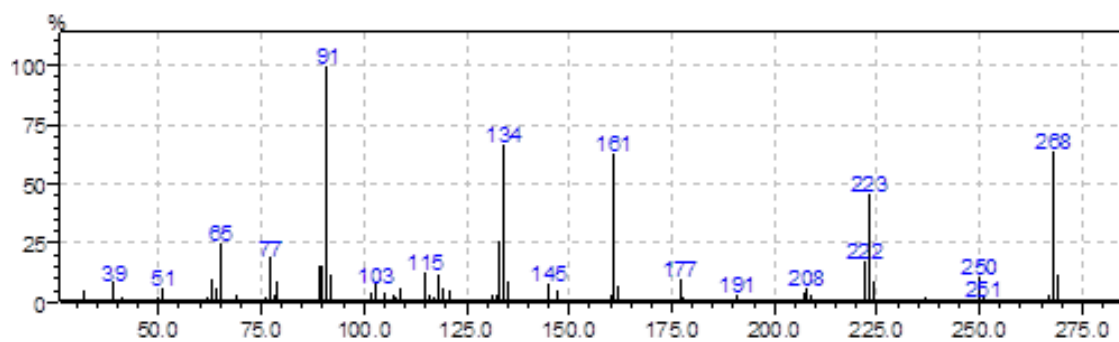

**Figure S87** – Mass spectrum of compound **4a**.

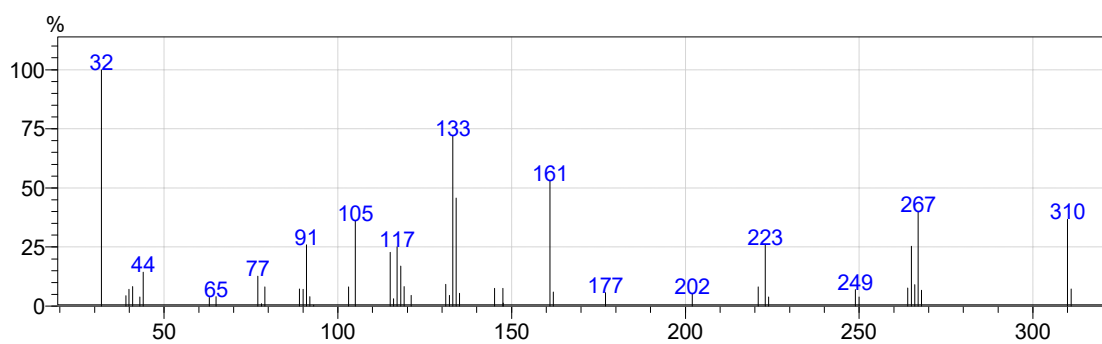

**Figure S88** – Mass spectrum of compound **4b**.

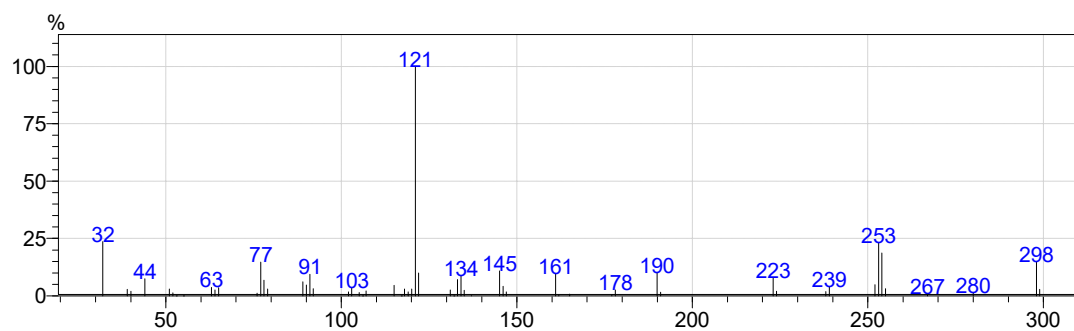

**Figure S89** – Mass spectrum of compound **4c**.

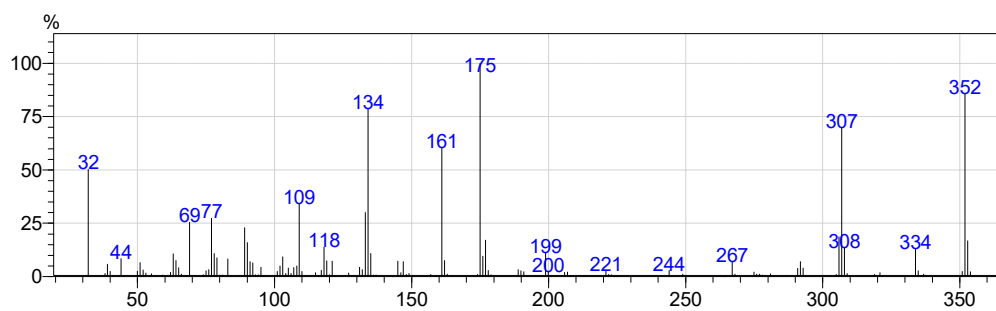

**Figure S90** – Mass spectrum of compound **4d**.

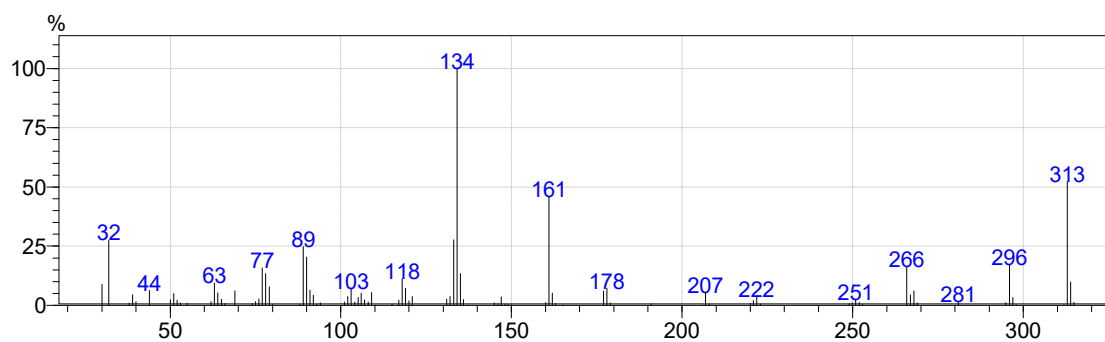

**Figure S91** – Mass spectrum of compound **4e**.

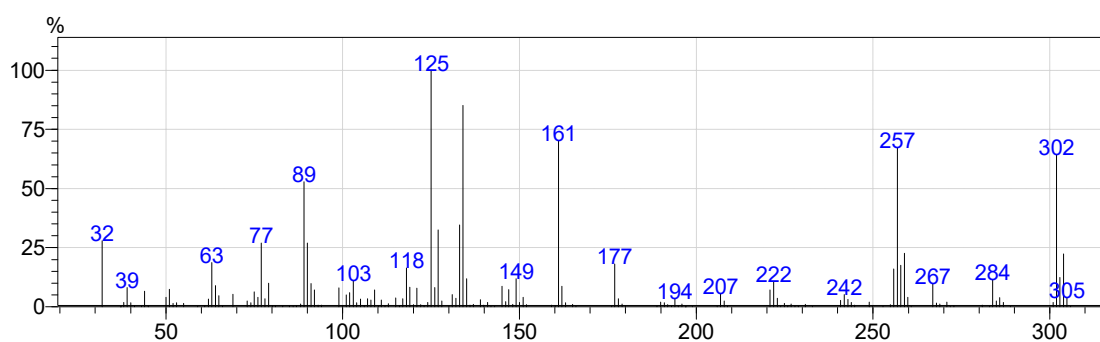

**Figure 92** – Mass spectrum of compound **4f**.



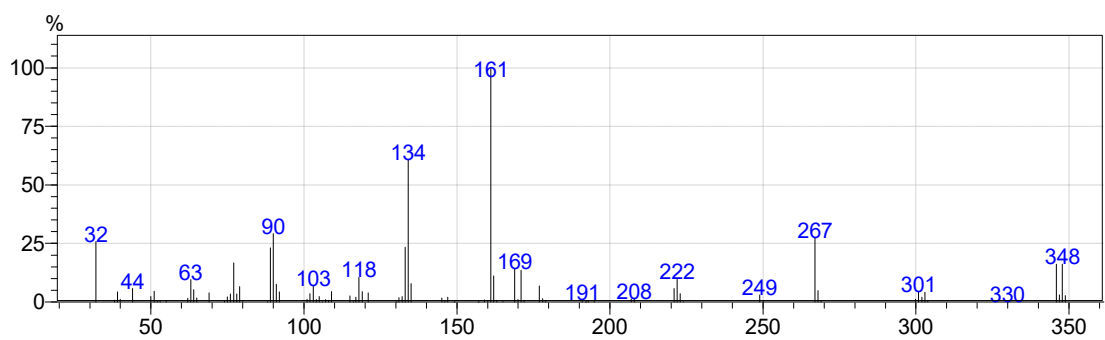

**Figure 93** – Mass spectrum of compound **4g**.

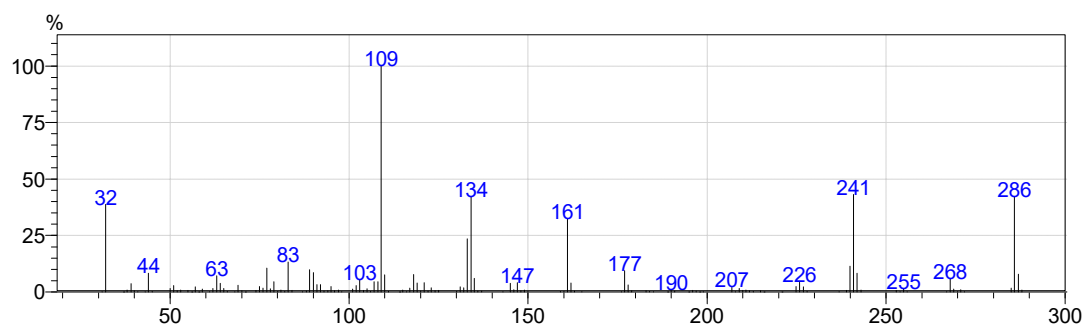

**Figure 94** – Mass spectrum of compound **4h**.

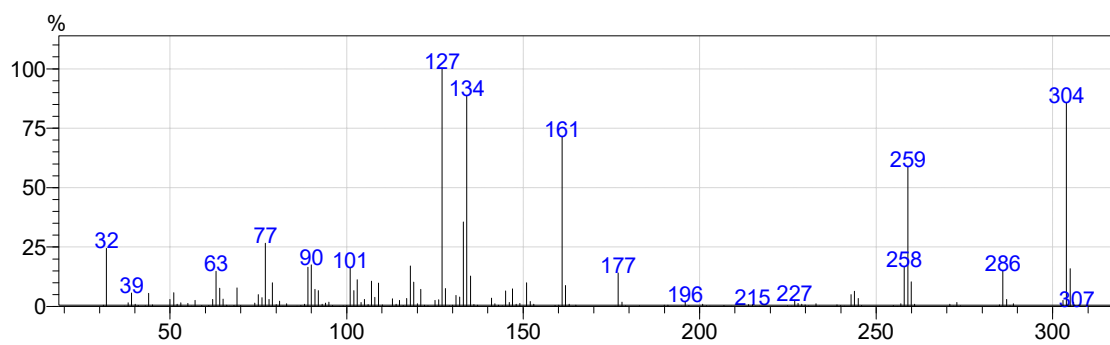

**Figure 95** – Mass spectrum of compound **4i**.

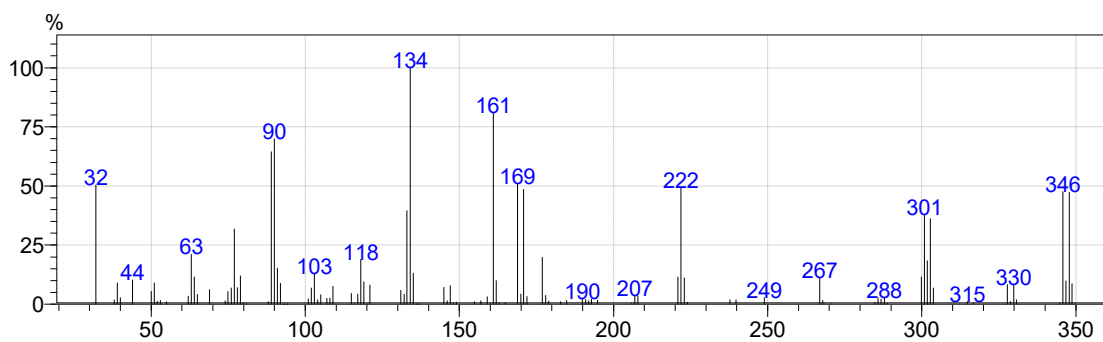

**Figure 96** – Mass spectrum of compound **4j**.

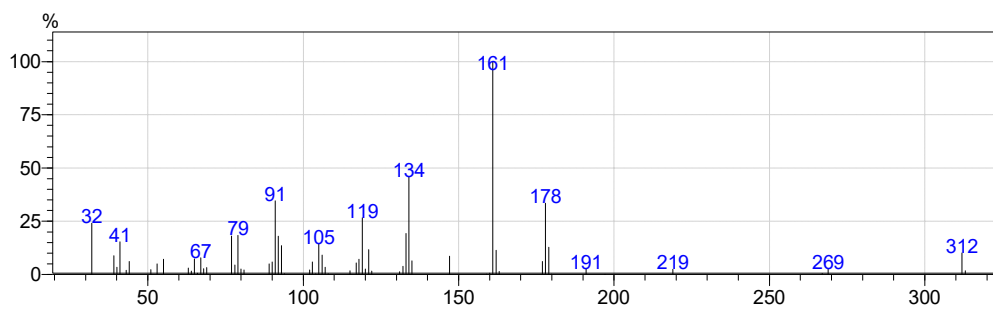

**Figure 97** – Mass spectrum of compound **4k**.

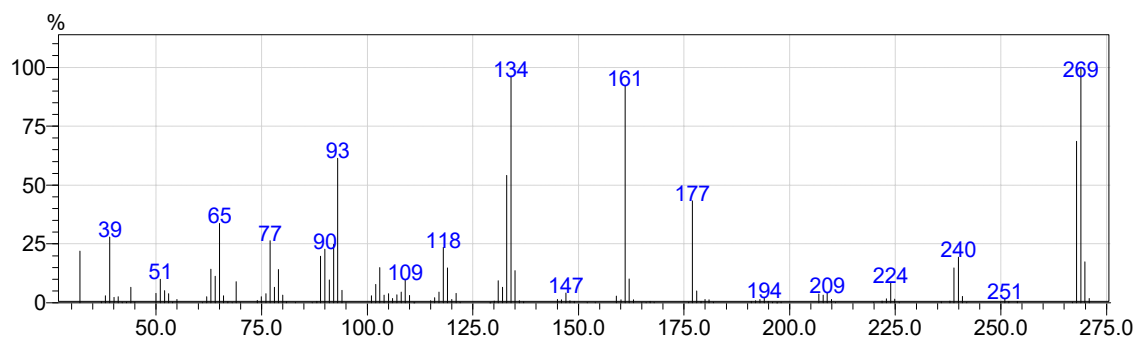

**Figure 98** – Mass spectrum of compound **4l**.

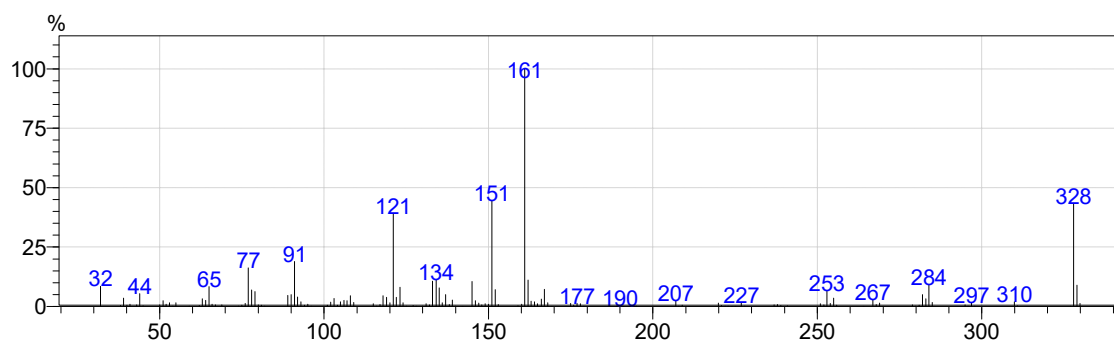

**Figure S99** – Mass spectrum of compound **4m**.

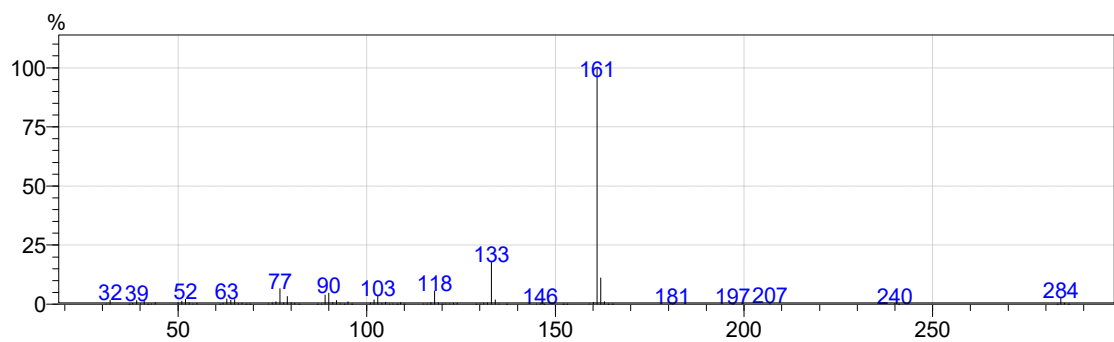

**Figure S100** – Mass spectrum of compound **4n**.

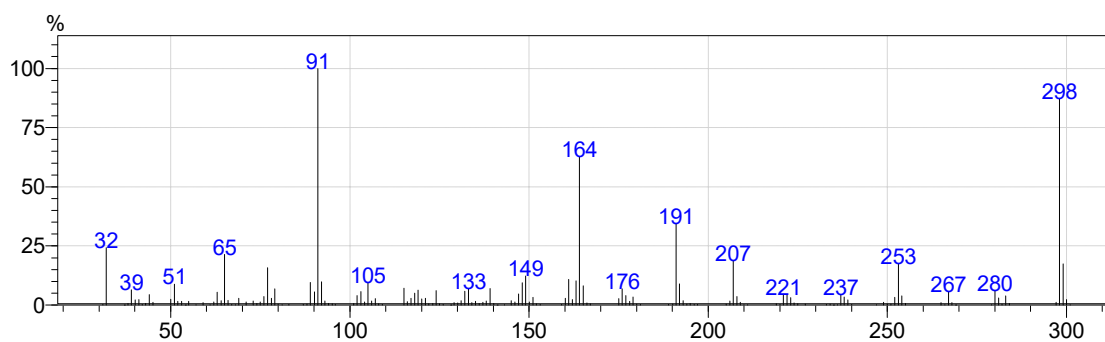

**Figure S101** – Mass spectrum of compound 5a.

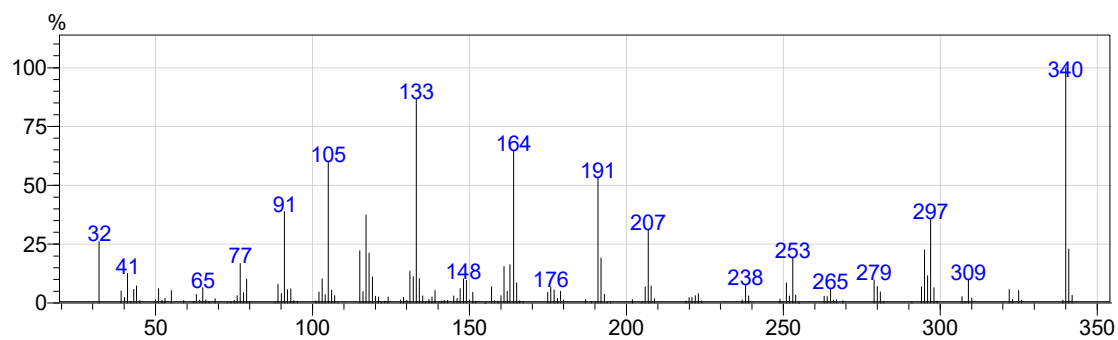

**Figure S102** – Mass spectrum of compound 5b.

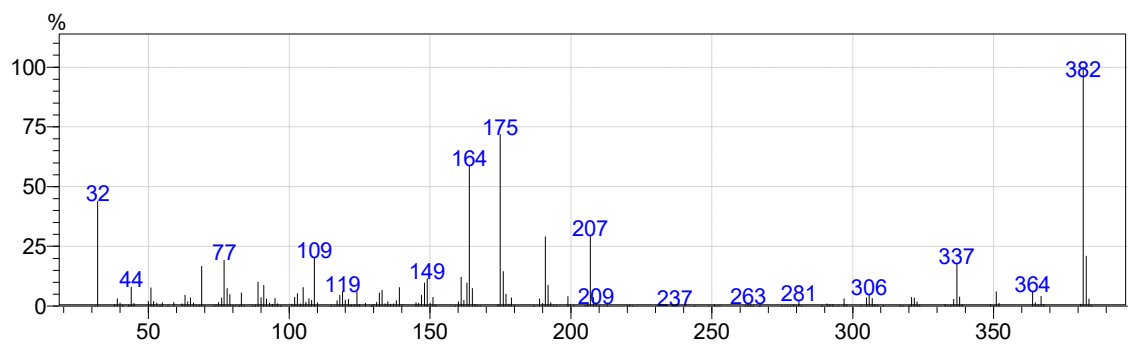

**Figure S103** – Mass spectrum of compound 5d.

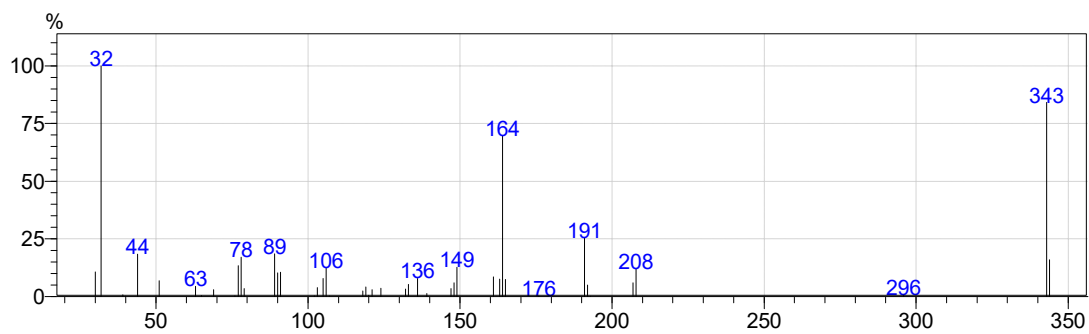

**Figure S104** – Mass spectrum of compound 5e.

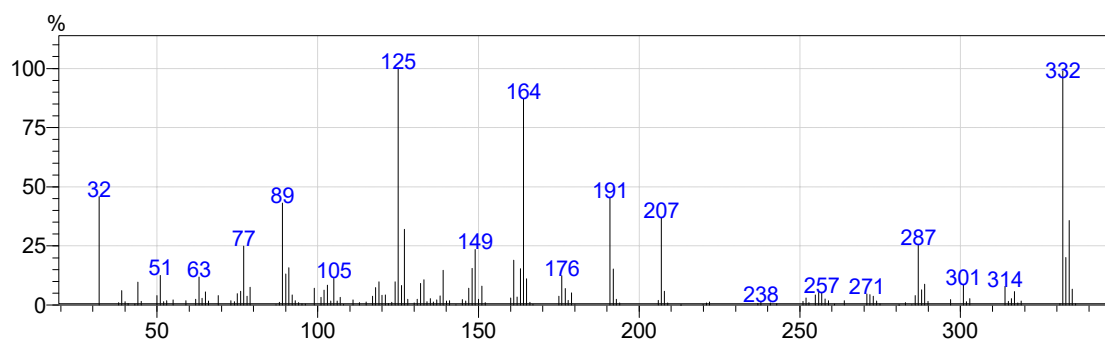

**Figure S105** – Mass spectrum of compound 5f.

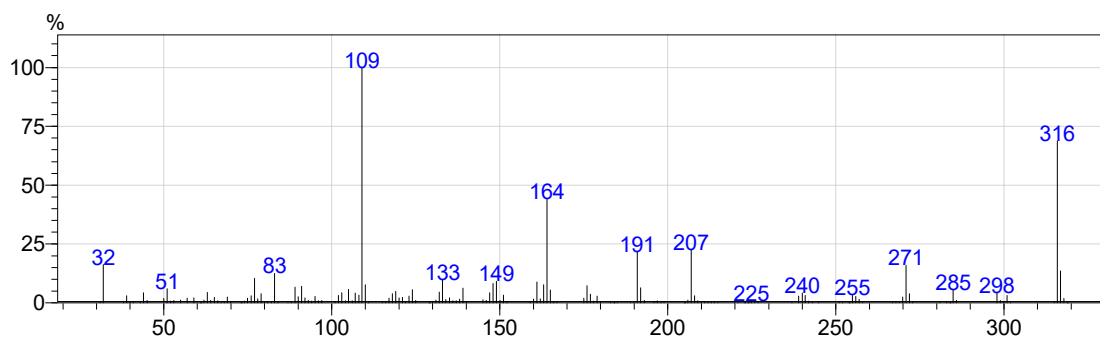

**Figure S106** – Mass spectrum of compound 5h.

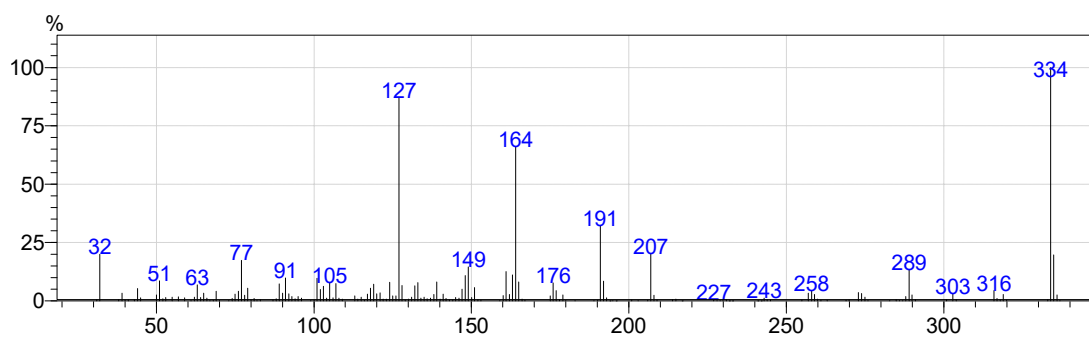

**Figure S107** – Mass spectrum of compound 5i.

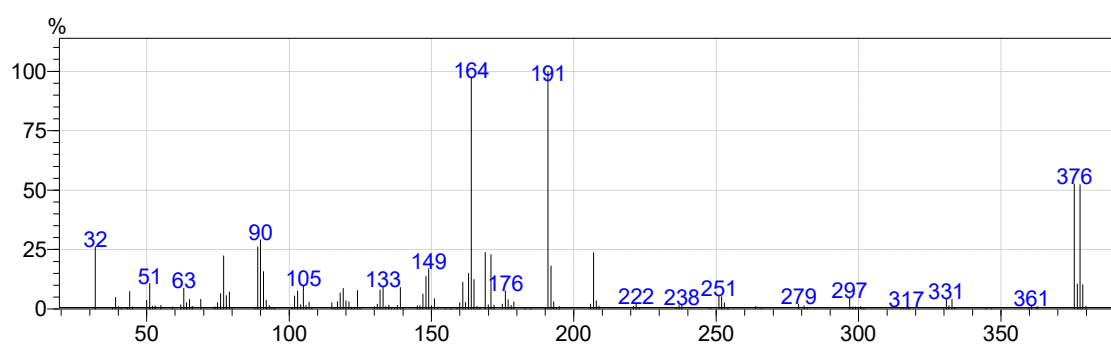

**Figure S108** – Mass spectrum of compound 5j.



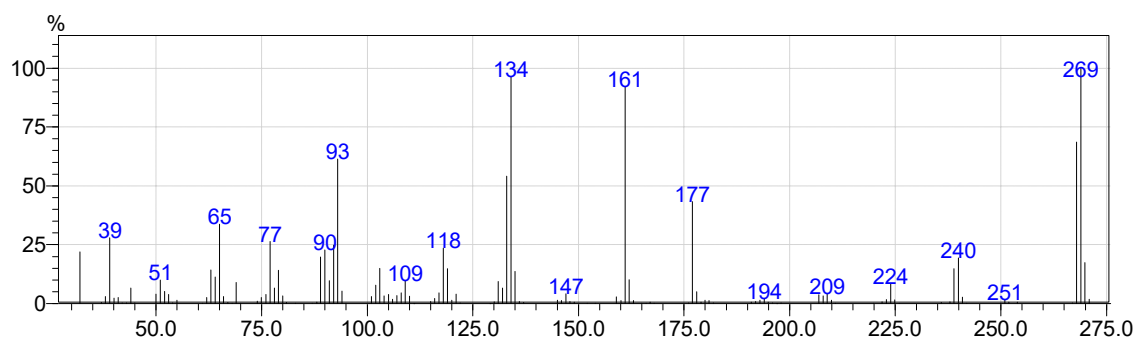

**Figure S109** – Mass spectrum of compound **5I**.

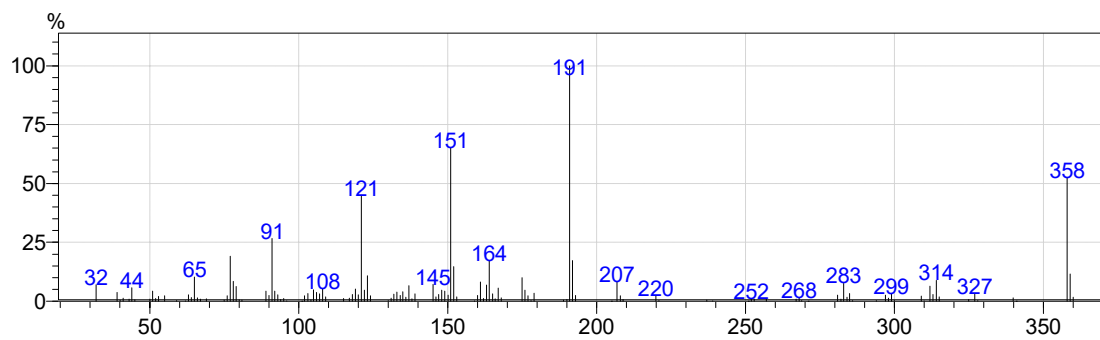

**Figure S110** – Mass spectrum of compound **5m**.

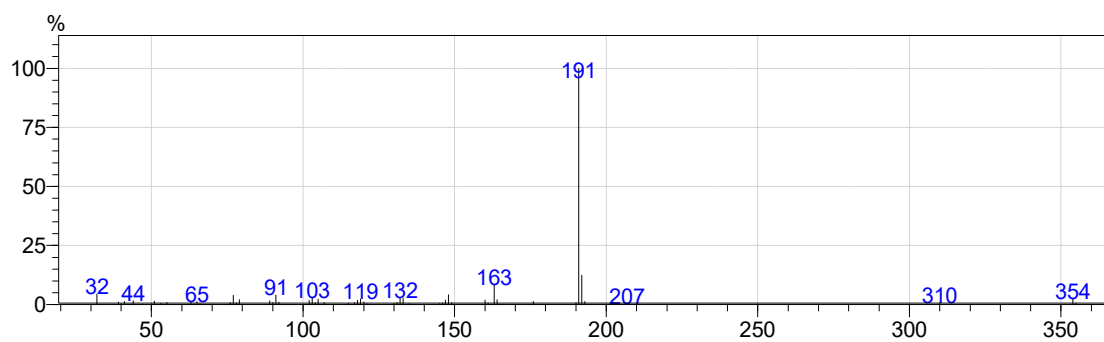

**Figure S111** – Mass spectrum of compound **5n**.

**CHARACTERIZATION OF COMPOUND (*E*)-2-METHOXYPHENYL 3-(3,4-DIMETHOXYPHENYL)ACRYLATE (5o) BY X-RAY DIFFRACTOMETRY**

Room temperature (298(2) K) single-crystal X-ray diffraction data were measured on a Rigaku Oxford Diffraction 2020 X-ray diffractometer. The crystals were mounted on a goniostate and exposed to X-ray radiation (Mo K $\alpha$  = 0.71073). The software used to collect data, structure solution, and refinements were the followings: CrysAlisPro 1.171.41.93a (Rigaku, OD, 2020) for collecting, refinements, and reduction of data; SHELST 2018/2 [48] and SHELXL 2018/3 [48] for structure solution and refinements; OLEX 2 1.5-beta [49] for structure analysis and molecular graphic construction. Nonhydrogen asymmetric units were determined using electronic density distribution via Fourier transformation. A riding model was used for hydrogen positions with fixed valence bond lengths and angles. Nonhydrogen and hydrogen atoms were refined as anisotropic and isotropic ( $U_{\text{iso}}(\text{H}) = 1.2U_{\text{iso}}(\text{C}_{\text{CH}})$  or  $1.5U_{\text{iso}}(\text{C}_{\text{CH}_3})$ ), respectively. Other collected parameters and the statistic refinements are shown in Table S1.

**Tabela S1** – Crystallographic data and refinements for compound **5o**

|                                                      |                                                |
|------------------------------------------------------|------------------------------------------------|
| Empirical formula                                    | C <sub>18</sub> H <sub>18</sub> O <sub>5</sub> |
| Formula weight                                       | 314.32                                         |
| Crystalline system                                   | Monoclinic                                     |
| Space group                                          | P 2 <sub>1</sub> /c                            |
| Z/Z'                                                 | 4/1                                            |
| T (K)/ $\lambda$ (Å)                                 | 293/0.71073                                    |
| Unit cell dimensions                                 | $a = 9.40396(6)$ Å                             |
|                                                      | $b = 7.8454(5)$ Å                              |
|                                                      | $c = 22.2482(13)$ Å                            |
|                                                      | $\alpha = 90^\circ$                            |
|                                                      | $\beta = 101.934(6)^\circ$                     |
|                                                      | $\gamma = 90^\circ$                            |
|                                                      |                                                |
| Volume of unit cell (Å <sup>3</sup> )                | 1605.94(18)                                    |
| Density – calculated (mg m <sup>-3</sup> )           | 1300                                           |
| Absorption coefficient $\mu$ (mm <sup>-1</sup> )     | 0.095                                          |
| 2 $\theta$ interval for data collection (°)          | 2.586 to 34.532                                |
| Intervals of index                                   | $h = -13-15$                                   |
|                                                      | $k = -11-12$                                   |
|                                                      | $l = -35-35$                                   |
| Collected reflections                                | 26452                                          |
| Independent reflections                              | 6533                                           |
| Observed reflections                                 | 3134                                           |
| Symmetry factor                                      | 0.0395                                         |
| Completeness to $\theta_{\text{max}}$ (%)            | 95.6                                           |
| F(000)                                               | 664.0                                          |
| Refined parameters                                   | 211                                            |
| Goodness-of-fit on F <sup>2</sup>                    | 1.009                                          |
| Residual index for I>2% (I) (R1)                     | 0.0526                                         |
| wR2 for all data                                     | 0.1689                                         |
| Largest difference peak and hole (e/Å <sup>3</sup> ) | 0.150 and -0.191                               |
| CCDC deposit number                                  | 2248204                                        |

The asymmetric unit of compound **5o** is depicted in Figure S112.

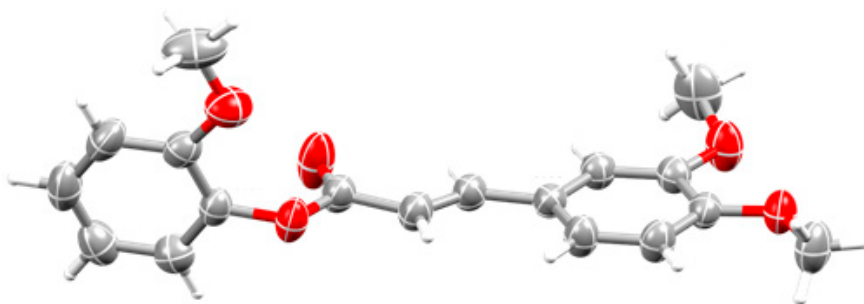

**Figure S112** – Asymmetric unit of compound **5o**. (50% probability ellipsoids for non hydrogen atoms, while hydrogens are arbitrary radius spheres)

The compound **5o** crystallizes in the P21/c monoclinic system, presenting only one molecule in the asymmetric unit. The compound is essentially planar from the 3,4-dimethoxy phenyl group to the carbonyl ester functionality, indicating delocalized electrons in this planar portion. However, the 2-methoxyphenyl group has its own plan. Moreover, the double bond presents a *trans* configuration, which agrees with the NMR data.

[48] Sheldrick, G. M. Crystal structure refinement with SHELXL. *Acta Crystallogr. Sect. C* **2015**, 71, 3-8.

[49] Dolomanov, O.V.; Bourhis, L.J.; Gildea, R.J.; Howard, J. A. K.; Puschmann, H. OLEX2: A complete structure solution, refinement and analysis program. *J. Appl. Crystall.* **2009**, 42, 339-341.
